# Supplementary material for: GLOFs in the WOS: bibliometrics, geographies and global trends of research on glacial lake outburst floods (Web of Science, 1979–2016)
Source: Copernicus journal article supplement (doi:10.5194/nhess-18-813-2018), 2018-03-14
Supplement: Supplementary file 1 [file SUPPLEMENT.xlsx]

## Sheet: HOTSPOTS
TITLE		ABSTRACT	KEYWORDS		CAS	HKH	KRK	ALP	ICL	SCA	ALA	GRL	NAC	CAN	PAN
12600 years of lake level changes, changing sills, ephemeral lakes and Niagara gorge erosion in the Niagara peninsula and eastern Lake Erie basin		Over the last 12 600 years, lake levels in the eastern Lake Erie basin have fluctuated dramatically, causing major changes in drainage patterns, flooding and draining ephemeral Lake Wainfleet several times and widening and narrowing the Niagara Gorge as the erosive effects of Niagara Falls waxed and waned. The control sill for Lake Erie levels was at first the Fort Erie/Buffalo sill, before the L…	lake levels; Lake Erie; Lake Wainfleet; Niagara Gorge; Niagara River; Niagara Peninsula palynology	-									1
2D Modelling of Megaflood due to Glacier Dam-break in Altai Mountains, Southern Siberia		One of the largest known megafloods due to glacier dam-break is that occurred during Late Quaternary in Altai Mountains, Southern Siberia. Hydrodynamic modelling is one of the viable approaches to enhancing the understanding of the ancient flood due to glacier dam-break. A well-balanced two dimensional hydrodynamic model, which can properly capture shock waves, cope with rugged bed topography and…	Glacier dam-break flood; Well-balanced; 2D hydrodynamic model; OpenMP	-
882 lakes of the Cordillrea Blanca: An inventory, classification, evolution and assessment of susceptibility to outburst floods		An inventory of the lakes within the Cordillrea Blanca of Peru was made based on manual analysis of high resolution optical images and was verified during field surveys. In total, 882 lakes were detected, classified and described by several qualitative and quantitative characteristics. The majority of the lakes were characterised as moraine-dammed lakes (35.2%), followed by bedrock-dammed lakes (…	High mountain lakes; GLOFs; Environmental change; Natural dams; Huascaran NP	-										1
A 1000-year history of large floods in the Upper Ganga catchment, central Himalaya, India		Determining the frequency, magnitude and causes of large floods over long periods in the flood-prone Himalaya is important for estimating the likelihood of future floods. A thoUSAnd year record (with some information from 2600 years ago) of the frequency and some estimates of velocities and discharges of large floods has been reconstructed in the Upper Ganga catchment, India, using written report…	Landslide lake outburst floods; Flood deposits; Climate change; Flood history; Himalaya	-		1
A 1500-year record of temperature and glacial response inferred from varved Iceberg Lake, southcentral alaska		We present a varve thickness chronology from glacier-dammed Iceberg Lake in the southern alaska icefields. Radiogenic evidence confirms that laminations are annual and record continuous sediment deposition from A.D. 442 to A.D. 1998. Varve thickness is positively correlated with Northern Hemisphere temperature trends, and more strongly with a local, similar to 600 yr long tree ring width chronolo…	alaska; Arctic climate; climatic history; glacial lakes; glacial sediments; glaciation fluctuations; little lee age; medieval warm period; stratigraphy; varves	-							1
A CENTURY OF INVESTIGATIONS ON OUTBURSTS OF THE ICE-DAMMED LAKE MERZBACHER (CENTRAL Tien SHAN)		Bavarian alpinist and researcher Gottfried Merzbacher discovered an ice-dammed lake in 1903 while trying to reach the mysterious Khan Tengri peak, located where kyrgyzstan, Kazakhstan, and China meet. This lake, which was later named after him, is currently two lakes in the Northern Inylchek Valley. At an altitude of 3300 m and 3400 m above sea level (a.s.l.), these two lakes are known as Lower L…	Global Change Observatory "Gottfried Merzbacher"; Glacier lake outburst floods; Lake Merzbacher; Climate change; Tien Shan	-	1
A COMPARISON OF 2 RECENT JOKULHLAUPS FROM AN ICE-DAMMED LAKE, SONDRE STROMFJORD, WEST Greenland				-								1
A comprehensive approach and methods for glacial lake outburst flood risk assessment, with examples from Nepal and the transboundary area		Like other mountainous areas, Nepal is highly vulnerable to glacial lake outburst floods (GLOFs), and this vulnerability has increased due to climate change. Risk reduction strategies must be based on a comprehensive risk assessment. A comprehensive methodological approach for GLOF risk assessment is described and illustrated in case studies of the potential GLOF risk posed in Nepal by four glaci…	GLOF risk management; GLOF; Himalayas; GLOF modelling; hazard mapping; glacial lakes; Nepal	-		1
A COMPUTER-MODEL ALONG A FLOW-LINE OF AN ICE DOME - CAPTURED ICE SHELF		The paper examines the 'captured ice shelf' hypothesis through the construction of a numerical model. Based on ice surface elevation, ice thickness, and ground topography, the velocity is calculated. The thickness is adjusted, taking into account the effects of mass balance and deformation. By calculating the fluid potential, the location of the water divide in the ice rim around the captured lak…		-
A continental shelf sedimentary record of Little Ice Age to modern glacial dynamics: Bering Glacier, alaska		The Bering Glacier System is the world's largest surging temperate glacier with seven events occurring over the past century under a range of north Pacific climatic conditions. Onshore records reveal changes in glacial termini positions and evidence of late Holocene glacial advances, but the Little Ice Age (LIA) record of potential glacial surging and associated flooding has not been examined. A …	Bering Glacier; Gulf of alaska; Glacial surge; Little Ice Age; Continental shelf; Sedimentation	-							1
A coupled sheet-conduit mechanism for jokulhlaup propagation		The largest glacier outburst flood ( jokulhlaup) ever recorded in iceland occurred in 1996 and came from subglacial lake Grimsvotn in Vatnajokull ice cap. Among other noteworthy features, this flood was characterized by an unprecedentedly high lake level prior to flood initiation, extremely rapid linear rise in lake discharge, delay between the onset of lake drainage and floodwater arrival at the…		-					1
A critical assessment of subglacial mega-floods: a case study of glacial sediments and landforms in south-central Alberta, Canada		The existing subglacial megaflood explanation of glacial sediment deposition and landform production in south-central Alberta relies upon four sets of observations and associated interpretations: (1) a subglacial genesis for all glacilacustrine sediments lying stratigraphically below a local melt-out till or "ice stagnation facies"; (2) a melt-out genesis for the "ice stagnation facies"; (3) a sy…		-									1
A First-order Method to Identify Potentially Dangerous Glacial Lakes in a Region of the Southeastern Tibetan Plateau		Though glacial lake outburst floods have become an urgent issue on the Tibetan Plateau, no standardized methods have been proposed so far to identify and prioritize potentially dangerous glacial lakes (PDGLs). Here, we developed a first-order approach to identify PDGLs in the Boshula Mountain Range, southeastern Tibetan Plateau. Five variables-mother glacier area, distance between lake and glacie…	Potentially dangerous glacial lakes; glacial lake outburst floods (GLOFs); moraine-dammed lake; southeastern Tibetan Plateau; China	-
A fluid dynamics approach to modelling the 18th March 2007 lahar at Mt. Ruapehu, New Zealand		Lahars are water-sediment mass flows from a volcanic source. They can be triggered by a variety of mechanisms and span a continuum of flow rheology and hydraulic properties, even within the same event. Lahars are extremely powerful landscaping agents and represent a considerable hazard potential. However, this highly dynamic character and a lack of direct measurements has made modelling lahars di…	Outburst flood; Mass flow; Lahar; Dam break; Mt. Ruapehu; New Zealand; Delft3d	-
A framework of numerical simulation on moraine-dammed glacial lake outburst floods		Glacial outburst floods (GLOFs) in alpine regions tend to be relatively complicated, multi-stage catastrophes, capable of causing significant geomorphologic changes in channel surroundings and posing severe threats to infrastructure and the safety and livelihoods of human communities. GLOF disasters have been observed and potential hazards can be foreseen due to the newly formed glacial lakes or …	moraine-dammed glacial lakes; glacial outburst floods; dam breaching mechanisms; dam-breach models; flood routing models	-
A glacial burst tsunami near Vestmannaeyjar, iceland		Violent glacial bursts (jokulhlaup) are huge floods produced by subglacial volcanic eruptions. They are well known in iceland. The biggest jokulhlaups come from Katla and can discharge water masses on a scale of several cubic kilometers into the ocean in just a few hours. Subglacial volcanoes can melt the glacier fast enough to produce 100,000-300,000 m(3)/s discharges for a long enough time to p…	jokulhlaup; flood; computational hydraulics; wave dynamics; numerical modeling	-					1
A glacial lake outburst flood associated with recent mountain glacier retreat, Patagonian Andes		Geomorphological mapping, sedimentology, lichenometry and dendrochronology were used to assess the nature and timing of glacier recession, moraine development and catastrophic mass movements in a tributary of the Leones valley, east of the Hielo Patagonico Norte, Chile. We show that during the 'Little Ice Age' Glaciar Calafate advanced downvalley to produce a terminal moraine. Recession of the gl…	glacier; Patagonia; mass movement; glacial lake outburst flood (GLOF); `Little Ice Age'; paraglacial	-											1
A global assessment of the societal impacts of glacier outburst floods		Glacier outburst floods are sudden releases of large amounts of water from a glacier. They are a pervasive natural hazard worldwide. They have an association with climate primarily via glacier mass balance and their impacts on Society partly depend on population pressure and land use. Given the ongoing changes in climate and land use and population distributions there is therefore an urgent need …	Jokulhlaup; GLOF; Glacier lake; Proglacial; Hazard; Risk	-	1	1	1	1	1	1	1	1	1	1	1
A HISTORY OF JOKULHLAUPS FROM STRANDLINE LAKE, alaska, USA				-							1
A jokulhlaup from a LaurenTian captured ice shelf to the Gulf of Mexico could have caused the bolling warming		Since the rapid rate of global warming at the onset of the Bolling interstadial became evident, its cause has been under debate. It coincides closely in time with a strong global transgression called meltwater pulse 1a. One attempt at solution says that a meltwater pulse of antarctic origin could cause an increase in North Atlantic Deep Water formation, and thus give rise to the Bolling interstad…	Wisconsin glaciation; megaflood; mwp-1a; meltwater pulse; interstadial; deglaciation; climate forcing; climate change; Mississippi Fan; Mississippi Canyon; ice age; atmospheric methane concentration; atmospheric carbon dioxide concentration; sea-level change; Unktehi	-	1
A JOKULHLAUP NEAR SONDRE STROMFJORD, WEST Greenland, AND SOME EFFECTS ON THE ICE-SHEET MARGIN				-								1
A lake detection algorithm (LDA) using Landsat 8 data: A comparative approach in glacial environment		Glacial lakes show a wide range of turbidity. Owing to this, the normalized difference water indices (NDWIs) as proposed by many researchers, do not give appropriate results in case of glacial lakes. In addition, the sub-pixel proportion of water and use of different optical band combinations are also reported to produce varying results. In the wake of the changing climate and increasing GLOFs (g…	NDWI; GIS; Landsat-8; Glacial lakes; Remote sensing	-
A late quaternary catastrophic flood in the Lahul Himalayas		Impressive flood deposits are described resulting from a catastrophic lake outburst in the Upper Chandra valley in the Lahul Himalaya, northern India. Reconstructions of the former glacial lake, Glacial Lake Batal, and the discharges were undertaken using landforms and sediment data. The glacial dam burst released 1.496 km(3) of water in 0.72 days, with peak discharges of between 21000 and 27000 …	Himalayas; high-magnitude flood event; northern India; glacial lake outburst; glacial geomorphology	-		1
A Laurentide outburst flooding event during the last interglacial period		Episodes of ice-sheet disintegration and meltwater release over glacial-interglacial cycles are recorded by discrete layers of detrital sediment in the labrador Sea(1,2). The most prominent layers reflect the release of iceberg armadas associated with cold Heinrich events(3), but the detrital sediment carried by glacial outburst floods from the melting Laurentide Ice Sheet is also preserved(4). H…		-								1	1
A loess record of pre-Late Wisconsin glacial outburst flooding, Pleistocene paleoenvironment, and Irvingtonian fauna from the Rulo site, southeastern Washington, USA		Worldwide, loess-paleosol sequences are archives of terrestrial Quaternary paleoenvironment data. The Rulo site is a newly described site in the Palouse loess of southeastern Washington State, USA. The site reveals a 19 m thick deposit of loess and flood sediment, preserving a total of 30 m of reconstructed stratigraphic section. Five unconformity-bound sequences of sediment are exposed at the si…	Loess; Palouse; Paleosols; Fossils; Vertebrates; Missoula floods	-									1
A meltwater model for Laurentide subglacial landscapes		It is proposed that many subglacial landforms result from erosion and deposition by catastrophic outburst floods. Actualistic and deterministic approaches to glacial geomorphology are described and assessed. The generation of models by fantasy is introduced as an important step in the evolution of a meltwater model for subglacial landscape evolution. Subsequent inductive testing of this model inv…		-									1
A multi-dimensional analysis of pro-glacial landscape change at Solheimajokull, southern iceland		Pro-glacial landscapes are some of the most active on Earth. Previous studies of pro-glacial landscape change have often been restricted to considering either sedimentological, geomorphological or topographic parameters in isolation and are often mono-dimensional. This study utilized field surveys and digital elevation model ( DEM) analyses to quantify planform, elevation and volumetric pro-glaci…	DEM; photogrammetry; LiDAR; sediment; moraine; glacier; river	-					1
A multi-level strategy for anticipating future glacier lake formation and associated hazard potentials		In the course of glacier retreat, new glacier lakes can develop. As such lakes can be a source of natural hazards, strategies for predicting future glacier lake formation are important for an early planning of safety measures. In this article, a multi-level strategy for the identification of overdeepened parts of the glacier beds and, hence, sites with potential future lake formation, is presente…		-				1
A new cycle of jokulhlaups at Russell Glacier, Kangerlussuaq, West Greenland		Jokulhlaups in 2007 and 2008 from an ice-dammed lake at the northern margin of Russell Glacier, West Greenland, marked the onset of a renewed jokulhlaup cycle after 20 years of stability. We present a record of successive ice-dammed lake drainage events and associated ice-margin dynamics spanning similar to 25 years. Robust calculations of lake volumes and peak discharges are made, based on inten…		-								1
A new remote hazard and risk assessment framework for glacial lakes in the Nepal Himalaya		Glacial lake outburst floods (GLOFs) pose a significant threat to downstream communities and infrastructure due to their potential to rapidly unleash stored lake water. The most common triggers of these GLOFs are mass movement entering the lake and/or the self-destruction of the terminal moraine due to hydrostatic pressures or a buried ice core. This study initially uses previous qualitative and …		-		1
A procedure for making objective preliminary assessments of outburst flood hazard from moraine-dammed lakes in southwestern British Columbia		Existing methods of evaluating the hazard posed by moraine-dammed lakes are unsystematic, subjective, and depend on the expertise and biases of the geoscientist. In this paper, we provide a framework for making objective preliminary assessments of outburst flood hazard in southwestern British Columbia. Our procedure relies on remote sensing methods and requires only limited knowledge of glacial p…	outburst flood; moraine-dammed lake; debris flow; hazard assessment; British Columbia	-									1
A QUALITATIVE VIEW OF SUB-ICE-SHEET LANDSCAPE EVOLUTION		Qualitative analysis of sub-ice-sheet landscapes is based on processes inferred from landform and sediment. Striation and plucking give information on the dynamic and thermodynamic conditions at the ice bed. Lodgement and melt-out tills indicate that basal accretion and freezing conditions were followed by melting during till deposition, under sliding ice in the case of lodgement and stagnant ice…	SUBGLACIAL LANDSCAPE; ICE SHEET; EROSION; ENTRAINMENT; TRANSPORT; DEPOSITION; OUTBURST FLOODS; THERMAL REGIME; LANDFORM	-
A rapidly growing moraine-dammed glacial lake on Ngozumpa Glacier, Nepal		Moraine-dammed glacial lakes are becoming increasingly common in the Himalaya as a result of glacier mass loss, causing concern about glacier lake outburst flood risk. In addition to extant lakes, the potential exists for many more to form, as more glaciers ablate down to the level of potential moraine dams. In this paper, we document the recent rapid growth of, a moraine-dammed lake on Ngozumpa …	Glacier; Glacial lake; Outburst flood; Hazard; Himalayas	-		1
A review and analysis of varve thickness records from glacial Lake Ojibway (Ontario and Quebec, Canada)		Varve thickness records from glacial Lake Ojibway provide a detailed picture of ice margin dynamics and paleohydrology for the Laurentide Ice Sheet during the early Holocene. The demise of Lake Ojibway occurred when an ice dam of the shrinking Laurentide Ice Sheet failed, perhaps releasing enough freshwater to impede Atlantic meridional overturning circulation and precipitate the 8200 cal BP clim…		-									1
A review of atmospheric and land surface processes with emphasis on flood generation in the Southern Himalayan rivers		Floods in the southern rim of the Indian Himalayas are a major cause of loss of life, property, crops, infrastructure, etc. They have long term socio-economic impacts on the habitat living along/across the Himalayas. In the recent decade extreme precipitation events have led to numerous flash floods in and around the Himalayan region. Sporadic case-based studies have tried to explain the mechanis…	Himalayas; Flood; Glacial lake outburst; Cloudburst; Lake dam outburst; Precipitation	-		1
A review of catastrophic drainage of moraine-dammed lakes in British Columbia		Moraine-dammed lakes are common in the high mountains of British Columbia. Most of these lakes formed when valley and cirque glaciers retreated from advanced positions achieved during the Little Ice Age. Many moraine dams in British Columbia are susceptible to failure because they are steep-sided, have relatively low width-to-height ratios, comprise loose, poorly sorted sediment, and may contain …		-									1
A review of fluvial floods in Chile, period 1574-2012: causes, recurrence and geographical effects(1)				-											1
A revised Canadian perspective: progress in glacier hydrology		Current research into glacier hydrology is occurring at a time when glaciers around the world, particularly those whose hydrological regimes affect populated areas, are shrinking as they go through a state of perpetual negative annual mass balance. Small glaciers alone are likely to contribute 0(.)5 to 1 mm year(-1) to global sea-level rise, with associated reductions in local freshwater resource…	glacier hydrology; mass balance; snow accumulation; meltwater production	-				1					1
A robust debris-flow and GLOF risk management strategy for a data-scarce catchment in Santa Teresa, Peru		The town of Santa Teresa (Cusco Region, Peru) has been affected by several large debris-flow events in the recent past, which destroyed parts of the town and resulted in a resettlement of the municipality. Here, we present a risk analysis and a risk management strategy for debris-flows and glacier lake outbursts in the Sacsara catchment. Data scarcity and limited understanding of both physical an…	Debris-flows; GLOF; RAMMS; Risk management; EarlyWarning System	-										1
A satellite perspective on jokulhlaups in Greenland		Methods by remote sensing techniques were developed to locate potential jokulhlaup lakes and to assess the volume of water discharged. To locate potential jokulhlaup lakes, a time sequence of LandSat satellite imagery covering the area was investigated with spectral mapping techniques. The investigations showed how LandSat images can be used to map surface water, glacial ice, and surface temporal…	arctic; Greenland; hydrology; jokulhlaup; remote sensing	-								1
A spectrum of jokulhlaup dynamics revealed by GPS measurements of glacier surface motion		GPS campaigns on glaciers during jokulhlaups show how subglacial floods affect glacier motion and shed light on the dynamics of such floods. Three such campaigns have been carried out on southern and western Vatnajokull, southeast iceland, over known jokulhlaup paths. Two slowly rising jokulhlaups from Grimsvotn and two rapidly rising jokulhlaups from the western and eastern Skafta cauldrons were…	glacier flow; glacier hydrology; jokulhlaups (GLOFs); subglacial lakes	-					1
A Younger Dryas (Loch Lomond Stadial) jokulhlaup deposit, Fort Augustus, Scotland		This study provides an insight into the impact of probably the largest flood ever to have been identified in mainland Britain by examining new sedimentary evidence from the Auchteraw terrace, Fort Augustus, Scotland. Study of three sections reveals a succession consisting of: (1) sheet gravels; (2) large trough-shaped depressions infilled with cross-stratified sands and gravels; (3) smaller-scare…		-
Abandonment chronology of glacial Lake Agassiz's northwestern outlet		Spillway scour lakes and basins in northwestern Saskatchewan were cored to determine when the spillways were abandoned. The cores contained the target contact of organic muck (gyttja) overlying inorganic sand or silty-clay rhythinites New AMS radiocarbon dates on terrestrial macrofossils, in conjunction with previously published and unpublished data from the area, indicate that the spillways were…	Lake Agassiz; vibracoring; chronology; northwestern outlet	-									1
ABLATION OF ICE-CORED MORAINE IN A HUMID, MARITIME CLIMATE: FOX GLACIER, New ZealAND		Depending on thickness, debris-cover can enhance or reduce ablation, compared to bare-ice conditions. In the geological record, hummocky moraines often represent the final product of the melt-out of ice-cored moraines, and the presence or absence of such moraine deposits can have paleoclimatic implications. To evaluate the effects of varying debris-cover and climate on ice-melt in a maritime mid-…	ablation; debris-cover; Fox Glacier; ice-cored moraine; New Zealand	-
ABOUT 40 LAST GLACIAL LAKE Missoula JOKULHLAUPS THROUGH SOUTHERN Washington				-									1
Abrupt weakening of the Indian summer monsoon at 8.2 kyr BP		An oxygen isotope record of biogenic carbonate from paleolake Riwasa in northwestern (NW) India provides a history of the Indian Summer Monsoon (ISM) from similar to 11 to 6 kyr B.P. The lake was dry throughout the Late Glacial period when aeolian sands were deposited. Lacustrine sedimentation commenced in the early Holocene and the lake deepened significantly at similar to 9.4 kyr B.P., indicati…	paleoclimate; stable isotopes	-		1
Accommodation Space Controls on the Latest Pleistocene and Holocene (16-0 ka) Sediment Size and Bypassing in the Lower Columbia River Valley: A Large Fluvial-Tidal System in Oregon and Washington, USA		In this study, we establish the roles that increasing basin accommodation space have on sediment size and bypassing in the transgressive fill (16-0 ka) in the submerged Lower Columbia River Valley (LCRV). The antecedent forearc valley (225 km in length, 4-8 km in width, and 60-115 m in axial valley depth) is characterized by high sediment supply rates (10-15 million t y(-1)) but no delta at its m…	Basin accommodation space; incised valley; Holocene transgression; sediment size; sediment bypassing	-									1
Active tectonics in Eastern Lunana (NW Bhutan): Implications for the seismic and glacial hazard potential of the Bhutan Himalaya		[ 1] Paleoseismological investigations, brittle fault analysis, and paleostrain calculations combined with the interpretation of satellite imagery and flood wave modeling were used to investigate the seismic and associated glacial hazard potential in Eastern Lunana, a remote area in NW Bhutan. Seismically induced liquefaction features, cracked pebbles, and a surface rupture of about 6.8 km length…		-		1
Adaptation to changing water resources in the Ganges basin, northern India		An ensemble of regional climate model (RCM) runs from the EU HighNoon project are used to project future air temperatures and precipitation on a 25 km grid for the Ganges basin in northern India, with a view to assessing impact of climate change on water resources and determining what multi-sector adaptation measures and policies might be adopted at different spatial scales. The RCM results sugge…	Climate change; Adaptation policies; Ganges; Water resources	-		1
Aeolian dune-field development in a water table-controlled system: Skeidararsandur, Southern iceland		Aeolian dune fields characterized by partly vegetated bedforms undergoing active construction and with interdune depressions that lie at or close to the water table are widespread on Skeidararsandur, Southern iceland. The largest aeolian dune complex on the sandur covers an area of 80 km2 and is characterized by four distinct landform types: (i) spatially isolated aeolian dunes; (ii) extensive ar…	Aeolian; cold climate; dune; iceland; jokulhlaup; nebkha; sandur; Skeidararsandur; water table	-					1
After the Flood. Mobility as an Adaptation Strategy in High Mountain Oases. The Case of Pasu in Gojal, Hunza Valley, Karakoram		The high mountain environment of the Hunza Valley in the Karakoram is characterised by significant potential energy, extended glaciation and related events that tend to threaten habitations and settlements. The village oasis of Pasu is taken as a case in point to highlight adaptation and coping strategies over a longer period. The village lands of Pasu have been shrinking over time owing to glaci…		-			1
Age constraints and paleoseismic implication of rock avalanches in the northern Patagonian Andes, Argentina		Landslides and rock avalanches are far more common features than once believed in the glacial valleys of the northern Patagonian Andes of Argentina. We describe three rock avalanches located in northwestern Neuquen province that generated land slide-dammed lakes. Cosmogenic radionuclide Cl-36 dating constrains their average ages as Late Pleistocene for the Lagunas de Varvarco rock avalanches (79.…	rock avalanches; paleoscismicity; landslide-dammed lakes; Neuquen	-											1
Airborne and spaceborne DEM- and laser altimetry-derived surface elevation and volume changes of the Bering Glacier system, alaska, USA, and Yukon, Canada, 1972-2006		Using airborne and spaceborne high-resolution digital elevation models and laser altimetry, we present estimates of interannual and multi-decadal surface elevation changes on the Bering Glacier system, alaska, USA, and Yukon, Canada, from 1972 to 2006. We find: (1) the rate of lowering during 1972-95 was 0.9 +/- 0.1 m a(-1); (2) this rate accelerated to 3.0 +/- 0.7 m a(-1) during 1995-2000; and (…		-							1		1
An active subglacial water system in West antarctica mapped from space		Satellite laser altimeter elevation profiles from 2003 to 2006 collected over the lower parts of Whillans and Mercer ice streams, West antarctica, reveal 14 regions of temporally varying elevation, which we interpret as the surface expression of subglacial water movement. Vertical motion and spatial extent of two of the largest regions are confirmed by satellite image differencing. A major, previ…		-
An approach for estimating the breach probabilities of moraine-dammed lakes in the Chinese Himalayas using remote-sensing data		To make first-order estimates of the probability of moraine-dammed lake outburst flood (MDLOF) and prioritize the probabilities of breaching posed by potentially dangerous moraine-dammed lakes (PDMDLs) in the Chinese Himalayas, an objective approach is presented. We first select five indicators to identify PDMDLs according to four predesigned criteria. The climatic background was regarded as the …		-		1
An assessment of conditions before and after the 1998 Tam Pokhari outburst in the Nepal Himalaya and an evaluation of the future outburst hazard		On 3 September 1998, a glacial lake outburst flood (GLOF) that originated from Tam Pokhari occurred in the Hinku valley of the eastern Nepal Himalaya. This study analyses the lake's geomorphic and hydrologic conditions prior to the outburst, and evaluates the conditions that could contribute to a future flood through photogrammetric techniques. We processed high-resolution Corona KH-4A (2.7m) and…	Tam Pokhari; Nepal Himalaya; glacial lake outburst flood; photogrammetric techniques; potentially dangerous glacial lakes	-		1
An assessment procedure for glacial hazards in the Swiss Alps		Glacial hazards such as ice avalanches, glacial lake outburst floods, and debris flows have caused severe damage in populated mountain regions such as the Swiss Alps. Assessment of such hazards must consider basic glaciological, geomorphological, and hydraulic principles together with experience gained from previous events. An approach is presented here to assess the maximum event magnitude and p…	glacial hazards; lake outburst; debris flow; ice avalanche; hazard assessment procedure; probability of occurrence	-				1
An Early Permian, paleopolar, postglacial, river-dominated deltaic succession in the Mackellar-Fairchild formations at Turnabout Ridge, Central Transantarctic Mountains, antarctica		Turnabout Ridge, a remote outcrop belt in the Beardmore Glacier Region of the Central Transantarctic Mountains, comprises subglacial-glaciomarine deposits of the Pagoda Formation (Fm) overlain by a postglacial deltaic succession of the Mackellar-Fairchild formations (fms). Four depositional environments were identified in the Mackellar-Fairchild fms: 1) prodelta to distal-delta-front deposits tha…	Subaqueous terminal distributary channels; Hyperpycnites; Delta front; Icehouse-greenhouse; Epeiric seaway	-
An ice-contact rhythmite (turbidite) succession deposited during the November 1996 catastrophic outburst flood (jokulhlaup), Skeioararjokull, iceland		This paper presents new evidence of coarse-grained deposition from a turbulent suspension within a low-energy 'slack-water' location during a recent well-documented, volcanically related, high-magnitude glacier outburst flood or jokulhlaup, Skeioararjokull, iceland. This study uses established spatial and temporal constraints on processes observed during the November 1996 jokulhlaup to interpret …	rhythmites; turbidites; slack-water; jokulhlaup; flood; glacier-margins	-					1
An improved method to represent DEM uncertainty in glacial lake outburst flood propagation using stochastic simulations		Modelling glacial lake outburst floods (GLOFs) or 'jokulhlaups', necessarily involves the propagation of large and often stochastic uncertainties throughout the source to impact process chain. Since flood routing is primarily a function of underlying topography, communication of digital elevation model (DEM) uncertainty should accompany such modelling efforts. Here, a new stochastic first-pass as…	GLOF; Flow path; Monte Carlo; Uncertainty; Digital elevation model; Bhutan	-		1
An Integrated Assessment of Vulnerability to Glacial Hazards A Case Study in the Cordillrea Blanca, Peru		The Rio Santa valley in the Cordillrea Blanca, Peru, has been repeatedly affected by severe glacial flood disasters in the past decades. The continuing high rate of glacier retreat has led to the formation and rapid growth of a large number of glacial lakes. Due to the risk of lake outburst floods, downstream communities are confronted with serious hazards. The regional capital of Huaraz is one o…	Glacial hazards; vulnerability; integrated assessment; Cordillrea Blanca; Peru	-										1
An integrated socio-environmental framework for glacier hazard management and climate change adaptation: lessons from Lake 513, Cordillrea Blanca, Peru		Glacier hazards threaten societies in mountain regions worldwide. Glacial lake outburst floods (GLOFs) pose risks to exposed and vulnerable populations and can be linked in part to long-term post-Little Ice Age climate change because precariously dammed glacial lakes sometimes formed as glaciers generally retreated after the mid-1800s. This paper provides an interdisciplinary and historical analy…		-										1
An inventory of glacial lakes in the Third Pole region and their changes in response to global warming		No glacial lake census exists for the Third Pole region, which includes the Pamir-Hindu Kush-Karakoram-Himalayas and the Tibetan Plateau. Therefore, comprehensive information is lacking about the distribution of and changes in glacial lakes caused by current global warming conditions. In this study, the first glacial lake inventories for the Third Pole were conducted for similar to 1990, 2000, an…	Glacial lake inventory; Glacier-fed lakes; Third Pole; Global warming	-	1	1	1
An overview of glacial hazards in the Himalayas		Glaciers and snowfields call form potential hazards in the Himalayas, and in similarly glacierised regions of the world. Some glaciological phenomena can have significant impacts upon society over a short time scale (minutes-days), such as ice/snow avalanches and glacial floods. Other related hazards call be equally serious but less obvious when considered on a much longer time scale (months-year…		-		1
AN UNUSUAL JOKULHLAUP INVOLVING POTHOLES ON BLACK RAPIDS GLACIER, alaska RANGE, alaska, USA				-							1
An unusual jokulhlaup resulting from subglacial volcanism, Solheimajokull, iceland		Jokulhlaups (glacial outburst floods) are frequent in glaciated terrain. Jokulhlaups exhibiting a sudden rise to peak discharge have not been subject to detailed investigation. A volcanically-generated flood burst from Solheimajokull, iceland in July 1999. This paper accounts for the causes, characteristics and impacts of this flood. Pre- and post-flood fieldwork was carried out at Solheimajokull…		-					1
Analysis and dynamic modeling of a moraine failure and glacier lake outburst flood at Ventisquero Negro, Patagonian Andes (Argentina)		Although moraine dams are inherently prone to failure because of their often weak structure, loose internal composition and lack of an engineered spillway, the understanding of dam breaching processes remains largely incomplete and appropriate modeling approaches are scarce. This paper analyzes a recent glacier lake outburst, caused by the failure of the terminal moraine of Ventisquero Negro (Pat…	Moraine breach; Glacier lake outburst flood (GLOF); Ventisquero Negro (Patagonia); Dam break modeling; BASEMENT; Outburst hydrograph	-											1
Analysis of climate effect on the moraine dammed lake outburst of Tibet		This paper is for study of flood hazard of moraine damned lake failures caused glacier avalanche. According to Data of the investigation of 13 failures of (11 Moraine dammed lakes) in Tibet, features of the avalanche and failure were analyzed. Climatic Characteristics were studied correspondingly by utilizing the data of 9 meteorological stations nearby. By analyzing the climatic characteristics …		-
Analysis of current trends in climate parameters, river discharge and glaciers in the Aksu River basin (Central Asia)		Climate variability and change play a crucial role in the vulnerable system of the Aksu River basin located in kyrgyzstan and northwest China, providing precious water resources for the intense oasis agriculture of the Xinjiang Province (China). Ubiquitous warming and increase in precipitation (in the lower part of the basin) have been detected. Glaciers in the region are retreating. Seasonal tre…	river discharge; climate parameters; trend analysis; glaciers; Aksu River basin; glacier lake outburst floods	-	1
Analysis of changes in climate and river discharge with focus on seasonal runoff predictability in the Aksu River Basin		The River Aksu is the principal tributary to the River Tarim, providing about three quarters of its discharge. It originates in kyrgyzstan and flows into the arid areas of the Xinjiang Uyghur Autonomous Region in China, where an extensive irrigated agriculture has been developed in the river oases. The aim of the present contribution is to review the current trends in temperature, precipitation, …	Temperature; Precipitation; Streamflow; Trend detection; River Tarim; River Aksu	-	1
Analysis of the first jokulhlaup at Blamannsisen, northern norway, and implications for future events		The first known jokulhlaup from the Blamannsisen ice cap in northern norway began on 6 September 2001. It lasted 35 hours and emptied the lake Ovre Messingmalmvatn (similar to 4.0 X 10(7) m(3)). Before the event, the lake drained steadily via a rock spillway into sweden. The water from the jokulhlaup drained into the hydropower reservoir Sisovatn, and so was financially beneficial to norway. Glac…		-						1
Annually resolved events of Younger Dryas glaciation in Lochaber (Glen Roy and Glen Spean), Western Scottish Highlands		This paper presents the results of micromorphological analysis of laminated sediments that accumulated in ice-dammed lakes in Lochaber (Glen Roy and vicinity) during the Younger Dryas (Loch Lomond) Stadial. These lakes were responsible for the formation of the famous 'Parallel Roads of Glen Roy' (Agassiz, 1840), prominent shorelines cut into the valley sides of Glen Roy and adjacent valleys. Annu…	Parallel Roads of Glen Roy; micromorphology; varves; Younger Dryas; chronology	-									1
Appearance of extreme monsoonal rainfall events and their impact on erosion in the Himalaya		Monsoonal rainfall in the Himalaya dominates erosion and sediment transport through the fluvial system. In addition to the strong seasonal nature of the Indian summer monsoon, striking interannual variations in monsoonal strength characterize longer records. For example, during any given year, rain may penetrate further into the orogen, even though peak rainfall amounts almost always occur at top…		-		1
Application of 2D hydrodynamic modelling to high-magnitude outburst floods: An example from Kverkfjoll, iceland		High-magnitude outburst floods cause rapid landscape change and are a hazard to life, property and infrastructure. However, high-magnitude fluvial processes and mechanisms of erosion, transport and deposition are very poorly understood, and remain largely unquantified. This poor understanding is partly because of the inherent difficulty of directly measuring high-magnitude outburst floods, but al…	high-magnitude outburst floods; palaeohydrology; hydraulics; 2D hydrodynamic; iceland	-					1
Application of GIS and remote sensing to land degradation in Hindu Kush - Himalaya region: Effects of glacier lake outburst floods on the river corridors, mountain valleys and downstream plains				-		1
Architectural analysis of a volcaniclastic jokulhlaup deposit, southern iceland: sedimentary evidence for supercritical flow		The 1918 eruption of the glacially capped Katla volcano, southern iceland, generated a violent jokulhlaup, or glacial outburst flood, inundating a large area of Myrdalssandur, the proglacial outwash plain, where it deposited ca 1 km(3) of volcaniclastic sediment. The character of the 1918 jokulhlaup is contentious, having been variously categorized as a turbulent water flow, a hyperconcentrated f…	antidunes; jokulhlaup; Katla; supercritical flow; volcaniclastic	-					1
Architectural-landsystem analysis of a modern glacial landscape, Solheimajokull, southern iceland		Glacial terrains are commonly recorded using a landsystem approach, which allows detailed documentation of the geomorphological evolution of the landscape. However, landsystem analysis of Quaternary subsurface stratigraphies in which landforms are not apparent or preserved is problematic, making delineation of the sedimentary architecture of a glaciated basin infill difficult. The purpose of this…	Glacial landsystems; Architectural element analysis; Modern analogue; Allostratigraphy; iceland	-					1
Architecture and sedimentation of outwash fans in front of the Myrdalsjokull ice cap, iceland		In this study, we introduce the architecture and style of sedimentation of two outwash fans in front of the Myrdalsjokull ice cap, central south iceland, that broaden different types of ice-marginal sedimentation. At Kotlujokull, a southeastern outlet of the ice cap, fan formation was monitored from the late 1970s to 2002; thus, the style of sedimentation is well understood and the relationship t…	outwash fans; supraglacial; hochsAnder; sediment architecture; Myrdalsjokull; iceland	-					1
Assessing downstream flood impacts due to a potential GLOF from Imja Tsho in Nepal		Glacial-dominated areas pose unique challenges to downstream communities in adapting to recent and continuing global climate change, including increased threats of glacial lake outburst floods (GLOFs) that can increase risk due to flooding of downstream communities and cause substantial impacts on regional social, environmental and economic systems. The Imja glacial lake (or Imja Tsho) in Nepal, …		-		1
Assessing lahars from ice-capped volcanoes using ASTER satellite data, the SRTM DTM and two different flow models: case study on Iztaccihuatl (Central Mexico)		Lahars frequently affect the slopes of ice-capped volcanoes. They can be triggered by volcano-ice interactions during eruptions but also by processes such as intense precipitation or by outbursts of glacial water bodies not directly related to eruptive activity. We use remote sensing, GIS and lahar models in combination with ground observations for an initial lahar hazard assessment on Iztaccihua…		-
Assessing the influence of the Merzbacher Lake outburst floods on discharge using the hydrological model SWIM in the Aksu headwaters, kyrgyzstan/NW China		Glacial lake outburst floods (GLOF) often have a significant impact on downstream users. Including their effects in hydrological models, identifying past occurrences and assessing their potential impacts are challenges for hydrologists working in mountainous catchments. The regularly outbursting Merzbacher Lake is located in the headwaters of the Aksu River, the most important source of water dis…	GLOF; jokulhlaup; Aksu River; Tarim River; Soil and Water Integrated Model; Merzbacher Lake	-	1
Assessment and Simulation of Glacial Lake Outburst Floods for Dhauliganga Basin in Northwestern Himalayan Region		Glacial lake outburst flood (GLOF) is created when water dammed by a glacier or a moraine is released. Some of the glacial lakes are unstable and most of them are potentially susceptible to sudden discharge of large volumes of water and debris which causes floods downstream i.e., GLOF. Many glacial lakes are known to have formed in the Himalaya in the last half century, and a number of GLOF event…	Glacial lake outburst flood (GLOF); Simulation; GLOF modeling; Himalayan region; MIKE-11	-		1
Assessment and Simulation of Glacier Lake Outburst Floods for Longbasaba and Pida Lakes, China		Longbasaba and Pida lakes are two moraine-dammed lakes located at the headwaters of the Geiqu River, a tributary of the Pumqu River in the Chinese Himalayas, at an elevation of about 5700 m. The minimum distance between the two takes is 24 m and their difference in elevation is about 76 m. Breach risks were assessed on the basis of field surveys carried out in the summers of 2004, 2005, and 2006.…	Moraine-dammed lake; Pumqu River Basin; GLOF; assessment and simulation; Himalayas; China	-		1
Assessment of glacial lake development and prospects of outburst susceptibility: Chamlang South Glacier, eastern Nepal Himalaya		Chamlang South Tsho has been identified as one of the six high-priority glacial lakes in terms of glacial lake outburst flood (GLOF) danger in Nepal Himalaya, despite the fact that no detailed investigations of the lake had been hitherto undertaken. We conducted detailed mapping of the lake and its surroundings along with field surveys in October 2009 to determine the developmental history of Cha…		-		1
Assessment of hydro-morphodynamic modelling and geomorphological impacts of a sediment-charged jokulhlaup, at Solheimajokull, iceland		Understanding of complex flood-riverbed interaction processes in large-scale (field) outburst floods remains incomplete, not least due to a lack of well-constrained field data on hydraulics and sediment transport, but also because consensus on an appropriate model framework has yet to be agreed. This study presents a novel full 2D hydro-morphodynamic model containing both bedload and suspended lo…	Morphodynamic model; Outburst floods; Sediment transport; River morphology	-					1
Assessment of possible jokulhlaups from Lake Demmevatn in norway		Artificial drainage tunnels were constructed after repeated catastrophic jokulhlaups from the glacier-dammed Lake Demmevatn. Models of glacier change and jokulhlaup discharge were used to develop scenarios in which the rock tunnels were blocked. The results show how the maximum jokulhlaup discharge depends on the volume of water in the lake and on the drainage mechanism. The discharge depends on …	jokulhlaup; outburst discharge model; Glacier Hardangerjokulen; norway	-						1
Assessment of potential outburst floods from the Tsho Rolpa glacial lake in Nepal		Flood and sediment disasters caused by glacial lake outbursts have occurred frequently in recent years in the Himalayas of Nepal. Glacial lake outburst floods (GLOFs) can cause catastrophic flooding in downstream areas with serious damage to lives and property. It is thus important to investigate outburst floods from potentially dangerous glacial lakes. In this study, the characteristics of poten…	Integrated modeling system; The Tsho Rolpa glacial lake; Moraine dam failure; Seepage flow; Water overtopping; Possible threats; Damages	-		1
Assessment of supraglacial lake growth from multi-temporal satellite data-a case study of Vasundhara Tal, Kumaun Himalaya, India		The climate change of the twentieth century has a pronounced effect on glacier environments of the Himalaya. The formation of supraglacial lakes and moraine dammed lakes and glacial lake outburst flood (GLOF) is major concern in countries such as India, Bhutan, Tibet, Nepal and Pakistan. The hazardous lakes, however, are situated in remote areas therefore very difficult to monitor through ground …	Remote sensing; supraglacial lake; GLOF; Natural hazards; Kumaun Himalaya	-		1
ASSESSMENT OF THE EVOLUTION IN VELOCITY OF TWO DEBRIS-COVERED VALLEY GLACIERS IN Nepal AND New ZealAND		Feature tracking of orthorectified pairs of Advanced Spaceborne Thermal Emission and Reflection Radiometer satellite images is used to calculate velocities for the Tasman Glacier, New Zealand (2002-2014) and the Khumbu Glacier, Nepal (2001-2008). Velocities in the middle and upper ablation zones of both glaciers show a long-term decrease of similar to 10-20%, while the terminus of Khumbu Glacier …	ice velocity; Khumbu Glacier; Tasman Glacier	-		1
Astoria Fan sediments, DSDP site 174, Cascadia Basin: Hf-Nd-Pb constraints on provenance and outburst flooding		The Astoria submarine fan, located off the coast of Washington and Oregon, has grown throughout the Pleistocene from continental input delivered by the Columbia River drainage system. Enormous floods from the sudden release of glacial lake water occurred periodically during the Pleistocene, carrying vast amounts of sediment to the Pacific Ocean. Deep Sea Drilling Project (DSDP) site 174, located …	hafnium; neodymium; lead; cataclysmic floods; isotopes	-									1
Bar deposition in glacial outburst floods: scaling, post-flood reworking, and implications for the geomorphological and sedimentary record		The appearance of a flood deposit in the geomorphological and sedimentary record is a product of the both the processes operating during the flood, and those that occur afterwards and overprinting the deposit with a record of 'normal' processes. Nearly half of the total discharge of the November 1996 jokulhlaup on Skeidararsandur was discharged through the Skeidara river. The flood deposits have …	iceland; braided river; jokulhlaup; sandur; proglacial; fluvial; scale invariance	-					1
Basal icequakes during changing subglacial water pressures beneath Gornergletscher, Switzerland		Using dense networks of three-component seismometers installed in direct contact with the ice, the seismic activity of Gornergletscher, Switzerland, was investigated during the summers of 2004 and 2006, as subglacial water pressures varied drastically. These pressure variations are due to the diurnal cycle of meltwater input as well as the subglacial drainage of Gornersee, a nearby marginal ice-d…		-				1
Basanite glaciovolcanism at Llangorse mountain, northern British Columbia, Canada		The Llangorse volcanic field is located in northwest British Columbia, Canada, and comprises erosional remnants of Miocene to Holocene volcanic edifices, lava flows or dykes. The focus of this study is a single overthickened, 100-m-thick-valley-filling lava flow that is Middle-Pleistocene in age and located immediately south of Llangorse Mountain. The lava flow is basanitic in composition and con…	glaciovolcanism; basanite; lahar; palagonite; thermal-model; British Columbia	-									1
Behaviour of particle-laden flows into the ocean: experimental simulation and geological implications		The behaviour of subaerial particle-laden gravity currents (e.g. pyroclastic flows, lahars, debris flows, sediment-bearing floods and jokulhlaups) flowing into the sea has been simulated with analogue experiments. Flows of either saline solution, simple suspensions of silicon carbide (SiC) in water or complex suspensions of SiC and plastic particles in methanol were released down a slope into a t…	Jokulhlaups; particulate gravity currents; pyroclastic	-
BOULDER RING STRUCTURES PRODUCED DURING JOKULHLAUP FLOWS - ORIGIN AND HYDRAULIC SIGNIFICANCE		This paper investigates the origin of a series of ring structures developed on Myrdalssandur, south iceland, following a major, volcanically - triggered jokulhlaup in 1918. The ring structures are characterized by boulder-rich rims up to 4 m high and 40 m in diameter. The rims were found to be composed of diamicton which dips steeply into the central hollow, which is infilled with laminated fines…		-					1
Breaching of an ice dam at Qorlortossup tasia, south Greenland		In July 2003 an ice-dammed lake was suddenly drained in an outburst flood at Qorlortorssup tasia in south Greenland, the site of a projected hydropower station. The lake developed during the first decades of the 20th century as a result of the recession of the ice cap in this area. It used to drain over a shallow rock spillway towards Sermeq kangigdleq, the adjacent outlet glacier to the north. I…		-								1
Breaking the seal at Grimsvotn, iceland		Of several problems associated with theoretical explanations of the jokulhlaups which emerge from the outlet glacier Skeioararjokull of the ice cap Vatnajokull in southeast iceland, the mechanism of flood initiation is one that has hitherto defied explanation. We provide, such an explanation based on a careful analysis of the classical Nye-Rothlisberger model; near the subglacial lake Grimsvotn, …		-					1
Buried and open tunnel valleys in Denmark - erosion beneath multiple ice sheets		Tunnel valleys are large, elongate and irregular depressions Cut beneath the margin of former ice sheets. They are generally believed to play a substantial role for the entire hydraulic system beneath ice sheets and thus also for ice sheet behaviour. Their origin, however, remains poorly understood. Examination of newly collected Danish hydrogeophysical and lithological data has revealed numerous…		-
Buried glacier ice in southern iceland and its wider significance		Geo-electrical resistivity surveys have been carried out at recently deglaciated sites in front of three glaciers in southern iceland: Skeioarajokull, Hrutarjokull, and Virkisjokull. The results show the presence of old glacier ice beneath debris mantles of various thickness. We conclude that buried glacier ice has survived for at least 50 years at Virkisjokull and Hrutarjokull, and probably for …	buried ice; resistivity surveys; iceland; dating; deglaciation	-					1
Calcareous Upper Pleistocene lowstand deposits indicate shelf/slope tectonic instability		Calcareous deposits, including shell, hash, and oolites, have been recorded in Upper Pleistocene lowstand deposits seaward of major rivers such as the Mississippi and the Ganges. These calcareous sediments indicate a major reduction or cessation of terrigenous deposition during lowstand/glacial maximum. Extensive high-energy sediments, including coarse sands and gravels, can bracket thin, low-ene…		-
Can lichenometry be used to date the "Little Ice Age" glacial, maximum in iceland?		In iceland, there are numerous examples of glacier advances dated to the latter half of the last century. However, in marked contrast to the Alps and northern Europe, the record of historical-age moraines before ca. 1850 is rather sparse. This paper examines to what extent this pattern reflects the actual history of glacier fluctuations, and to what extent it could be a function of preservation a…	glaciers; iceland; lichenometry; tephrochronology	-				1	1
Candidate subglacial volcanoes in the south polar region of mars: Morphology, morphometry, and eruption conditions		[1] A number of isolated mountains mapped in the south polar region of mars are documented using mars Global Surveyor (MGS) mars Orbiter Laser Altimeter (MOLA) and mars Orbiter Camera (MOC) data. These mountains have average separation distances of similar to175 km, they are typically 30-40 km in diameter and 1000-1500 m high, and their bases fall near an elevation of similar to1200 m. A signific…	mars; south polar; Dorsa Argentea Formation; subglacial volcanism; Hesperian	-
Canyon formation constraints on the discharge of catastrophic outburst floods of Earth and mars		Catastrophic outburst floods carved amphitheater-headed canyons on Earth and mars, and the steep headwalls of these canyons suggest that some formed by upstream headwall propagation through waterfall erosion processes. Because topography evolves in concert with water flow during canyon erosion, we suggest that bedrock canyon morphology preserves hydraulic information about canyon-forming floods. …		-					1				1
CAPACITY BUILDING FOR COLLECTING PRIMARY DATA THROUGH CROWDSOURCING - AN EXAMPLE OF DISASTER AFFECTED UTTARAKHAND STATE (India)		Uttarakhand State of India suffered a widespread devastation in June 2013 due to floods caused by excessive rain in the upper reaches of the Himalaya, glacial lake outburst flood (GLOF) and landslides. Restoration process in this mountainous State calls for scientifically sound planning so that the vulnerabilities and risks to such natural hazards are minimised and developmental processes are sus…	Crowdsourcing; Capacity Building; Disaster Management; MANU; Mobile Application; Uttarakhand	-		1
CASE FOR PERIODIC, COLOSSAL JOKULHLAUPS FROM PLEISTOCENE GLACIAL LAKE Missoula				-									1
Cataclysmic Scabland flooding: Insights from a simple depth-averaged numerical model		This work presents numerical assessments of possible routing paths for the reported late Pleistocene Missoula floods, which involved Earth's largest known peak discharges of freshwater. For our numerical model, we adopt the diffusion wave approximation of the shallow-water equation with the empirical Manning coefficient. This simplification is required because (1) most previous studies are one-di…	cataclysmic floods; channeled Scabland; glacial lake Missoula; numerical simulation; depth-averaged	-									1
Catastrophic discharge of fluvial sediment to the ocean: Evidence of Jokulhlaups events in the Alsek Sea Valley, southeast alaska (USA)				-							1
Catastrophic flood sediments in Chryse Basin, mars, and Quincy Basin, Washington: Application of sandar facies model		Viking visible and thermal infrared observations and terrestrial catastrophic flood deposits provide clues to identify the outflow channel sediments that went into Chryse Basin on mars. On Earth, sandar (outwash plains formed by coalescence of many jokulhlaup floods) are described in terms of three laterally adjacent facies: proximal, midfan, and distal. The Missoula Flood sediments deposited in …		-									1
Catastrophic flooding, palaeolakes, and late Quaternary drainage reorganization in northern Eurasia		We review the long history of Russian scientific study of the major late Quaternary palaeodrainages and palaeolakes in northern Eurasia to provide overviews of (1) past research efforts (mainly published in the Russian language) and (2) recent studies that include contributions from those outside of the former Soviet Union region. There are two major groups of catastrophic flooding phenomena and …	northern Eurasia; catastrophic flooding; palaeolakes; palaeodrainages; drainage reorganization; glaciation; late Quaternary	-
CATASTROPHIC GLACIAL OUTBURST FLOOD (JOKULHLAUP) MECHANISM FOR DEBRIS FLOW GENERATION AT THE SPIRAL TUNNELS, KICKING HORSE RIVER BASIN, BRITISH-COLUMBIA				-
Catastrophic impact of extreme flood events on the morphology and evolution of the lower Jokulsa a Fjollum (northeast iceland) during the Holocene		The impact of extreme flood events is rarely considered in studies of long-term landscape evolution, despite the potential for catastrophic landscape change in a short period of time. Here, we use an integrated approach of geomorphological mapping, topographic analysis and geophysical surveys to identify and quantify the impact of extreme flood events (jokulhlaups) along the Jokulsa a Fjollum, ic…	Bedrock erosion; Extreme floods; Rivers; Gorges; iceland; Electrical resistivity tomography	-					1
Catastrophic middle Pleistocene jokulhlaups in the upper Susquehanna River: Distinctive landforms from breakout floods in the central Appalachians		Widespread till and moraines record excursions of middle-Pleistocene ice that flowed up-slope into several watersheds of the Valley and Ridge Province along the West Branch of the Susquehanna River. A unique landform assemblage was created by ice-damming and jokulhlaups emanating from high gradient mountain watersheds. This combination of topography formed by multiple eastward-plunging anticlinal…	Jokulhlaup; Ice-damming; Susquehanna River; Middle Pleistocene; Valley and Ridge; Geomorphology	-
Catastrophic partial drainage of Pangong Tso, northern India and Tibet		Catastrophic partial drainage of Pangong Tso, one of the largest lakes in Tibet, is supported by the geomorphology of the Tangtse Valley, Ladakh, northern India and cosmogenic Be-10 nuclide ages of roche moutonnees, strath terraces, and a flood deposit downstream from the former spillway. The former spillway for Pangong Tso is similar to 20m-high and likely allowed similar to 18 km(3) of water to…	Floods; Ladakh; Himalaya; Be-10 dating; Strath terraces; Pangong Tso	-		1
Cauldron subsidence and subglacial floods		Ice cauldrons are depressions which form at the surface of ice sheets when an underlying subglacial lake empties, in particular when subglacial volcanic eruptions occur. Notable examples of such cauldrons occur on the surface of the Vatnajokull ice cap in iceland. More generally, cauldrons will form when a subglacial lake empties during a jokulhlaup. The rate of subsidence of the ice surface is r…		-					1
Causes of catastrophic failure of Tam Pokhari moraine dam in the Mt. Everest region		The moraine dam of the Tam Pokhari glacial lake breached on 3 September 1998 and caused a catastrophic flood in the downstream areas. To learn from the event, a field survey was conducted. The survey team found that a landslide, which is considered to be responsible for the outburst flood, occurred in the northeast-facing slope of the moraine dam. The dam internal structure played a crucial role …	Climatic change; Mountain hazard; Moraine dam formation and failure; Slope stability; Landslides; Himalaya	-		1
Circulation and thermodynamics in a subglacial geothermal lake under the Western Skafta cauldron of the Vatnajokull ice cap, iceland		The subglacial, geothermal lake beneath the Western Skafta cauldron ( depression) in the Vatnajokull ice cap, iceland, was accessed by hot water drilling through the overlying 300 m-thick ice shelf. Most of the ca. 100-m water column was near 4.7 degrees C, but was underlain by a distinct similar to 10 m-deep water mass at 3.5 degrees C. The sensible heat content of the lake water is approximatel…		-					1
Climate Change and Slope Instability		Pronounced step-wise atmospheric warming during the 20th century reduced ice cover in most of Earth's mountains by 25-50 percent. Net changes in temperatures responsible for this remarkable deglacierization are less than 2 degrees C, a small fraction of the warming that occurred at the end of the Pleistocene. Yet the effects of warming of the past century have been profound. Alpine permafrost, wh…	Landslides; Climate change; Permafrost thaw; Deglacieriztaion; Jokulhlaup; Moraine dam; Glacier dam	-
Climate change impacts on glacial lakes and glacierized basins in Nepal and implications for water resources		An increasing number of glacial lakes have been observed in recent years in Nepal and other Himalayan countries. Glacial lake outburst floods (GLOFs) causing destruction of life, agricultural land, hydropower installations, and other costly infrastructure have also occurred more frequently in recent years in Nepal, Tibet (China) and elsewhere in the Himalayas. Recent temperature and discharge dat…	climate change; glaciers; glacial lake; glacial lake outburst flood (GLOF); low flow; water resources; Himalayas; India; Nepal; Tibet (China)	-		1
Climate change in Nepal and its impact on Himalayan glaciers		Climate change can be particularly hard-hitting for small underdeveloped countries, relying heavily on natural resources for the economy and livelihoods. Nepal is one among these countries, being landlocked, with diverse physiographical characteristics within a relatively small territory and with rugged terrain. Poverty is widespread and the capacity of people and the country to cope with climate…	Himalayas; Glacial lake outburst flood; Glacier fluctuations; River discharge; Livelihoods	-		1
Climate Change Issues of Nepal: Challenges and Perspectives for Future Generations		Himalayan nation Nepal, a land locked country lies between China and India. Kathmandu, a historical and World heritage city is situated in central part of Nepal. Nepal is endowed with second position in water resources in the world, and comprises of more than 6,000 rivers and rivulets; however it faces serious water crunch and water pollution; deterioration of ecosystem and depletion of ground wa…	climate change; Nepal; threats	-		1
Climate change signature of small-scale parasequences from Lateglacial-Holocene transgressive deposits of the Arno valley fill		Despite recent report of short-term cyclicity from Lateglacial-Holocene deposits of several coastal plains worldwide, no precise documentation of the key factors controlling cyclic facies architecture has been made available by previous work. Detailed sedimentological analysis of a continuously-cored borehole, around the town of Pisa, in western Tuscany, provides evidence for the occurrence of th…	Climate change; Millennial-scale cycles; Parasequence; Pollen; Holocene; Tuscany	-
Climate Change, Perceptions, and Social Heterogeneity in Pharak, Mount Everest Region of Nepal		Based on 15 months of research conducted between 2010 and 2012, this paper examines how climate change is unfolding for Sherpas in Pharak, the southern part of Nepal's Everest region. Sherpas are noticing environmental changes, undergoing socioeconomic transformation, being introduced to climate change, and becoming exposed to multiple forms of environmental knowledge from various sources. Thus, …	climate change; perceptions; social heterogeneity; Nepal; Sherpas	-		1
Climatic control on river discharge simulations, Zackenberg River drainage basin, northeast Greenland		A spatially distributed, physically based, hydrologic modeling system (MIKE SHE) was applied to quantify intra- and inter-annual discharge from the snow and glacierized Zackenberg River drainage basin (512 km 2; 20% glacier cover) in northeast Greenland. Evolution of snow accumulation, distribution by wind-blown snow, blowing-snow sublimation, and snow and ice surface melt were simulated by a spa…	Arctic; Greenland; IPCC A2 and B2; MIKE SHE runoff modelling; SnowModel; water balance; Zackenberg	-								1
Climatic control on the peak discharge of glacier outburst floods		Lakes impounded by natural ice dams occur in many glacier regions. Their sudden emptying along subglacial paths can unleash similar to 1 km(3) of floodwater, but predicting the peak discharge of these subglacial outburst floods ('jokulhlaups') is notoriously difficult. To study how environmental factors control jokulhlaup magnitude, we use thermo- mechanical modelling to interpret a 40- year floo…		-	1
Climatic changes and their impact on socio-economic sectors in the Bhutan Himalayas: an implementation strategy		This paper contributes to an enhanced understanding of present climatic conditions, observed climate trends and regional climate vulnerability of the Bhutan Himalayas. Bhutan's complex, often high-altitude terrain and the severe impact of the Indian summer monsoon leads to a strong exposure of the countries' key economic sectors (agriculture, forestry, hydropower generation and tourism) to climat…	Regional climate variability and change; Socio-economic impacts; Climate change adaptation; Vulnerability hot spot; Eastern Himalayas	-		1
Climatic response of Quaternary alluvial deposits in the upper Kali Gandaki valley (West Nepal)		The terraces at the confluence of Kali Gandaki and Miristi Khola (West Nepal) consist of coarse-grained deposits which are considered to be Late Pleistocene to Holocene in age. The stacking pattern of lithofacies is characterised by an alternation of fluvial and debris flow deposits. These periodic changes in sedimentation processes are attributed to climatic variations. Deposits of extended, hig…	climatic response; alluvial deposits; Quaternary; Kali Gandaki Valley; Nepal	-		1
Climatic Variability and Impacts on Biodiversity at Local Level: A case Study from Kanchanjanga Conservation Area, Nepal		Impacts of climatic variability on biodiversity and livelihood aspects were examined in Kanchanjunga Conservation Area (KCA) Nepal The area is characterized with unique gene pool, cultural, archeological, and historic values. Field reconnaissance survey, interaction with local communities and institutions were carried out for obtaining the necessary information. Linear trend analysis of climatic …	biodiversity; climate change; KCA; climatic variability; trend analysis	-		1
Climatic variations and geomorphology of the Indus River valley, between Nimo and Batalik, Ladakh (NW Trans Himalayas) during Late Quaternary		The Indus River valley is tectonically unstable, exhibiting complex topography, landscape relief, and varied sedimentation. The major geomorphic landforms are alluvial fans, debris cones, fluvio-lacustrine deposits, scree, and talus cones. In the present work, a transect between Nimo and Batalik along the river was studied to consider the geomorphological landform evolution during the Quaternary …	Late Quaternary; North-west Himalaya; Ladakh; Indus; Palaeolake	-		1
Coastal aeolian dune development, Solheimasandur, southern iceland		A coastal aeolian dune field on the distal parts of Solheimasandur, southern iceland is currently undergoing active construction. Ongoing sand deflation in the foreshore is demonstrated by the preservation of sand ridges in the downwind lee of obstacles, while a backshore sandsheet is characterised by actively accumulating long-wavelength wind ripples. The main region of aeolian accumulation is i…	aeolian; dune; nebkha; sandur; iceland; Solheimasandur; cold climate	-					1
Collapse of sediment-filled crevasses associated with floods and mass flows in the proximal zone of the Pernunnummi sandurdelta, III Salpausselka, SW finland		We aim to explain the complex geomorphology and sedimentology of the proximal zone of the Pernunnummi sandurdelta, which forms the most prominent portion of the Ill Salpausselka ice-marginal complex of the former scandinavian ice sheet in SW finland. We focus on the sedimentology of distinct, diamicton-covered glaciofluvial and glaciolacustrine landforms (kames), making accurate interpretations o…		-						1
Combination of SAR remote sensing and GIS for monitoring subglacial volcanic activity - recent results from Vatnajokull ice cap (iceland)		This paper presents latest results from the combined use of SAR (Synthetic Aperture Radar) remote sensing and GIS providing detailed insights into recent volcanic activity under Vatnajokull ice cap (iceland). Glaciers atop active volcanoes pose a constant potential danger to adjacent inhabited regions and infrastructure. Besides the usual volcanic hazards (lava flows, pyroclastic clouds, tephra f…		-					1
Comment on "Approach to estimating the maximum depth for glacially induced hydraulic jacking in fractured crystalline rock at Forsmark, sweden" by M. Lonnqvist and H. Hokmark			natural hydraulic fractures; glacially induced; Forsmark; jokulhlaups; megafloods; glacial incisions	-						1
Comments on: "Paleohydrautics of the last outburst flood from glacial Lake Agassiz and the 8200 BP cold event" by Clarke et al. [Quaternary Science Reviews 23 (2004) 389-407]				-									1
Community response to climatic hazards in northern Pakistan		Chitral is a landlocked and mountainous region of northern Pakistan located in the Hindu Kush mountains, with a total population of around 400,000 in 50,000 households. The inhabitants of Chitral face a variety of problems associated with climatic hazards throughout the year, such as heavy snowfall in winter, flash floods in summer, glacial outbursts, soil erosion, landslides, occasional earthqua…		-		1
Comparative methods for distinguishing flakes from geofacts: a case study from the Wenas Creek Mammoth site		Archaeologists have long struggled with distinguishing lithic materials modified by humans (artifacts) from natural objects (e.g., geofacts or zoofacts). This problem is especially difficult for finds of small numbers of flake-like lithic specimens, and particularly for very old finds. We attempt to address the artifact versus geofact problem at a paleontology site by employing three systematic a…	Chipped stone; Flake; Debitage; Geofact; Wenas Creek; Mammoth	-
Comparing a 1D hydraulic model with a 2D hydraulic model for the simulation of extreme glacial outburst floods		Glacial outburst floods jokulhlaups) destroy a significant amount of infrastructure in proglacial areas. Nevertheless, few studies have simulated extreme jokulhlaup inundation using hydraulic modelling. In this study, we demonstrate the capability of one-dimensional jokulhlaup simulation (HEC-RAS modelling software) and compare simulation results with those from a two-dimensional finite element m…	glacial outburst flood; hydraulic modelling; jokulhlaup; iceland	-					1
Comparison of modeled water input and measured discharge prior to a release event: Unteraargletscher, Bernese Alps, Switzerland		A distributed temperature index melt model including potential clear-sky solar radiation was applied to Unteraargletscher, Bernese Alps, Switzerland, to quantify water input to the glacial hydrological system during the ablation season 1999. Model parameters were determined by calibrating calculated melt with ablation measurements. Discharge was measured in the proglacial stream for 18 days until…		-				1
Complex circular subsidence structures in tephra deposited on large blocks of ice: Varoa tuff cone, Oraefajokull, iceland		Several broadly circular structures up to 16 m in diameter, into which higher strata have sagged and locally collapsed, are present in a tephra outcrop on southwest Oraefajokull, southern iceland. The tephra was sourced in a nearby basaltic tuff cone at Varoa. The structures have not previously been described in tuff cones, and they probably formed by the melting out of large buried blocks of ice…	Ice-melt subsidence; Lapilli tuff; Tuff cone; Hofsfjall; Subglacial; Jokulhlaup; Kettle hole; Eemian; Holocene	-					1
Constraining the timing of the most recent cataclysmic flood event from ice-dammed lakes in the Russian Altai Mountains, Siberia, using cosmogenic in situ Be-10		Ice-dammed lakes were repeatedly formed in intermontane basins in the Russian Altai Mountains throughout the Pleistocene. These cataclysmic outburst floods, caused by ice-dam failures, were documented as Earth's largest flood waves by other geoscientists. Using in situ Be-10, we successfully dated surfaces of flood-associated boulders located in a former lake basin and downvalley from a former ic…	Altai Mountains; Be-10; outburst flood; paleolake	-
Constraints on paleolake levels, spillways and glacial lake history, north-central Ontario, Canada		The recognition of ice-marginal deltas constructed during the formation of the Nakina II moraine and a previously unrecognized spillway, in the vicinity of Longlac, northern Ontario, indicates that existing concepts of ancestral lake level history and drainage systems in the Lake Superior-Lake Nipigon region is inadequate. Based on isostatically corrected digital elevation maps, ice-marginal delt…	Nakina moraines; Lake Nakina; Lake Minong; Lake Agassiz; Lake Ojibway; Mullet Outlet; Pic River	-									1
Constraints on the dynamics of subglacial basalt eruptions from geological and geochemical observations at Kverkfjoll, NE-iceland		The Kverkfjoll area, NE iceland is characterised by subglacial basalt pillow lavas erupted under thick ice during the last major glaciation in iceland. The water contents of slightly vesiculated glassy rims of pillows in six localities range from 0.85 +/- 0.03 to 1.04 +/- 0.03 wt%. The water content measurements allow the ice thickness to be estimated at between 1.2 and 1.6 km, with the range ref…	pillow lavas; subglacial volcanism; iceland; ice thickness estimates; Jokulhlaups	-					1
Contemporary glacier retreat triggers a rapid landslide response, Great Aletsch Glacier, Switzerland		The destabilization and catastrophic failure of landslides triggered by retreating glaciers is an expected outcome of global climate change and poses a significant threat to inhabitants of glaciated mountain valleys around the globe. Of particular importance are the formation of landslide-dammed lakes, outburst floods, and related sediment entrainment. Based on field observations and remote sensi…		-				1
Controls on englacial sediment deposition during the November 1996 jokulhlaup, Skeidararjokull, iceland		This paper presents sedimentary evidence for rapid englacial debris entrainment during jokulhlaups. Previous studies of jokulhlaup sedimentology have focused predominantly on proglacial impact, rather than depositional processes within glaciers. However, observations of supraglacial floodwater outbursts suggest that englacial sediment emplacement is possible during jokulhlaups. The November 1996 …	jokulhlaup; englacial debris entrainment; glaciofluvial sediment; hydrofracturing; iceland	-					1
Controls on the development of supraglacial floodwater outlets during jokulhlaups		Recent field observations have revealed that jokulhlaups with a near-instantaneous rise to peak discharge can generate temporary hydraulic pressures capable of forcing floodwater through the surface of glaciers. This paper identifies and explains the controls on the development of supraglacial jokulhlaup outlets. Field evidence is presented from two recent icelandic jokulhlaups, which produced mu…	jokulhlaup; subglacial hydrology; flood routing; hydrofractilring; supraglacial; iceland	-					1
Controls on the formation and sudden drainage of glacier-impounded lakes: implications for jokulhlaup characteristics		Over the past few years there has been an increase in understanding of glacier-impounded or 'ice-dammed' lake behaviour. The spectacular jokulhlaup (catastrophic flood) from Grimsvotn, iceland in November 1996 has both raised the profile of such events and emphasized the need for awareness of the processes involved. This review summarizes the extent of current knowledge of ice-dammed lakes, highl…	flood hydrograph; flood routing; ice-dammed lake; jokulhlaup; threshold; trigger mechanism	-					1
Controls on the sedimentary architecture of a single event englacial esker: Skeioararjokull, iceland		Eskers have been used to infer the dynamics and palaeo-hydrology of large ice sheets yet there are few suitable contemporary analogues for esker sedimentation during Quaternary glaciations. Consequently, models of esker sedimentation have been derived from morpho-sedimentary analyses of Quaternary eskers, but these lack rigorous constraints on their depositional timescales. We identify the contro…		-					1
Controls on the sedimentology of an ice-contact jokulhlaup-dominated delta, Kangerlussuaq, west Greenland		This paper characterises the sedimentary impact of a glacial outburst flood or 'jokulhlaup' on an ice-contact delta topset at Russell Glacier, Kangerlussuaq, west Greenland. Rapid drainage of ail ice-dammed lake in July 1987 generated a jokulhlaup with a peak discharge of similar to 1300 m(3) s(-1), which drained across a 500-m-wide, 200-m-long, delta top into a proglacial lake. The delta topset …	Greenland; jokulhlaup; delta; Kangerlussuaq; rapid lake level change; sedimentology	-								1
Controls on the sedimentology of the November 1996 jokulhlaup deposits, Skeioararsandur, iceland		This paper examines controls on the sedimentology of deposits associated with the spectacular November 1996 jokulhlaup (glacial outburst flood, from the icelandic 'jokul' (glacial) and 'hlaup' (outburst) pronounced 'yow-koul-lauwp') on the proximal zone of the Skeioararsandur, iceland, the world's largest active glacial outwash plain. A volcanic eruption beneath the Vatnajokull ice-cap began on 3…		-					1
Cooling and freshening at 8.2 ka on the NW iceland Shelf recorded in paired delta O-18 and Mg/Ca measurements of the benthic foraminifer Cibicides lobatulus		A shallow marine sediment core from NW iceland provides evidence for a brief cooling and freshening at similar to 8200 cal yr BP, consistent with the hypothesis that the catastrophic outburst flood of the proglacial lakes Oijbway and Agassiz caused the 8.2 ka event. This is the first high-resolution record reconstructing near-surface temperatures and delta O-18(sw) by paired measurements of Mg/Ca…	Mg/Ca temperature calibration; Cibicides lobatulus; 8.2 event; icelandic shelf; North Atlantic; Irminger Current	-									1
Cosmogenic He-3 concentrations in ancient flood deposits from the Coombs Hills, northern Dry Valleys, East antarctica: interpreting exposure ages and erosion rates		In situ produced cosmogenic He-3 analyses provide independent support for the model of a stable, hyper-arid polar climate persisting in East antarctica since the mid-Miocene and provide quantitative constraints on long-term rates of erosion within the Dry Valleys. In the Coombs Hills area, a series of cobble-size boulders form mega-ripples with wavelengths of approximately 50 m. Their topographic…	stable cosmogenic isotopes He-3; exposure age; erosion rates; paleoclimatology; landscape evolution; Dry Valleys	-
Coupled 2D Hydrodynamic and Sediment Transport Modeling of Megaflood due to Glacier Dam-break in Altai Mountains, Southern Siberia		One of the largest known megafloods on earth resulted from a glacier dam-break, which occurred during the Late Quaternary in the Altai Mountains in Southern Siberia. Computational modeling is one of the viable approaches to enhancing the understanding of the flood events. The computational domain of this flood is over 9460 km(2) and about 3.784 x 10(6) cells are involved as a 50 m x 50 m mesh is …	Glacier dam-break flood; Well-balanced; 2D hydrodynamic and sediment transport model; OpenMP parallelization	-
Coupled fluid dynamics-sediment transport modelling of a Crater Lake break-out lahar: Mt. Ruapehu, New Zealand		Lahars, and other sudden onset floods, are highly dynamic with temporally and spatially evolving sediment loads. Numerical models of sudden onset flood behaviour, particularly those applied to real world events, have tended to neglect sediment transport processes. This is a serious though perhaps understandable shortcoming given a lack of field measurements on flow-bed interactions, the extra com…	Lahar; Sudden onset flood; Outburst flood; Mass flow; Dam break	-
Coupling glacial lake impact, dam breach, and flood processes: A modeling perspective		Glacial lake outburst floods (GLOFs) are highly mobile mixtures of water and sediment that occur suddenly and are capable of traveling tens to hundreds of kilometers with peak discharges and volumes several orders of magnitude larger than those of normal floods. They travel along existing river channels, in some instances into populated downstream regions, and thus pose a risk to people and infra…	Glacial lake outburst flood (GLOF); Process chain; Dynamic modeling; Natural hazard; BASEMENT; FLO-2D; RAMMS	-	1	1		1							1
Criteria for distinguishing high magnitude flood events in the proglacial fluvial sedimentary record		Recognizing high magnitude or extreme floods in the sedimentary record is important if estimates of their geomorphic and sedimentary significance over long time scales (i.e. 10(2)-10(3) years) are to be made. Standard regime or palaeocompetence based palaeohydraulic approaches present one set of solutions to this problem. An alternative is to examine the sedimentary record to determine the domina…	catastrophic flooding; magnitude and frequency; jokulhlaup; glaciofluvial; sandur; braided rivers; sedimentology; palaeohydrology	-					1
Dam break - Outburst flood propagation and transient hydraulics: A geosciences perspective		Dam break outburst floods are sudden, short-lived and high-magnitude discharges of water and sediment propagating over an initially 'dry' terrain. Both field observations by geoscientists and experimental measurements by engineers have produced understanding of outburst floods but neither approach has satisfactorily supplied data that is directly of use to hazard managers. This study draws togeth…	Unsteady flow; Surging flow; Sediment transport; Flume experiment; Jokulhlaup; Lahar	-
Database of glacial lake outburst floods (GLOFs)-IPL project No. 179		This article summarises activities and preliminary results of the International Programme on Landslides Project no. 179 "Database of glacial lake outburst floods (GLOFs)". This project is planned for 3years (2013-2015); the main objectives of the first year are (1) to create an online database and (2) to select collaborating partners. A survey of existing and relevant documents, information and o…	GLOFs; Natural hazards; Database; International collaboration; Cordillrea Blanca	-	1	1	1	1	1	1	1	1	1	1	1
Debris flow disaster at Larcha, upper Bhotekoshi Valley, central Nepal		Damage, destruction and casualties related to landslide and debris flow are common phenomena in the Himalaya, especially during the summer monsoon. This fact was tragically illustrated on 22 July 1996, when Larcha, situated at the 109-km mark of the Arniko Highway, upper Bhotekoshi Valley, central Nepal, experienced a catastrophic debris flow powered by the Bhairab Kunda Stream. Of the 22 houses …	Arniko Highway; colluvium; debris flow; glacial lake outburst flood; Higher Himalaya; Larcha; Lesser Himalaya; monsoon; upper Bhotekoshi Valley	-		1
Debris flow hazard of glacial lakes in the Central Caucasus		Glacier retreat is accompanied by formation of lakes within glacier moraines. The lakes may produce outburst floods which can transform into destructive debris flows. In the Central Caucasus this hazard has not been sufficiently studied, and the location and size of glacial lakes is not shown on the topographical maps. We have combined field and remote sensing research to Study glacial lakes and …	glacial lake outburst; debris flow; natural disaster; Central Caucasus	-
Debris flow initiation in proglacial gullies on Mount Rainier, Washington		Effects of climate change, retreating glaciers, and changing storm patterns on debris flow hazards concern managers in the Cascade Range (USA) and mountainous areas worldwide. During an intense rainstorm in November 2006, seven debris flows initiated from proglacial gullies of separate basins on the flanks of Mount Rainier. Gully heads at glacier termini and widespread failure of gully walls impl…	Debris flow; In-gully debris flow initiation; Glacier retreat; Climate change; Hazards; Cascade volcanoes	-									1
DEBRIS FLOWS RESULTING FROM GLACIAL-LAKE OUTBURST FLOODS IN TIBET, CHINA		During the last 70 years of general climatic amelioration, 18 glacial-lake outburst floods (GLOFs) and related debris flows have occurred from 15 moraine-dammed lakes in Tibet, China. Catastrophic loss of life and property has occurred because of the following factors: the large volumes of water discharged, the steep gradients of the U-shaped channels, and the amount and texture of the downstream…	glacial-lake outburst; floods; debris flow; flow transformation; sediment bulking; Tibet	-
Debris-flow distribution and hazards along the Sichuan-Tibet and Sino-Nepal highway, Tibet, China		The Sichuan-Tibet and Sino-Nepal highways, the main highways in south Tibet, are vital not only for the local economic development, but also for the national defense. The absence of railways in this area leads to a dependence on highway transportation. However, the highways are severely threatened by a wide distribution of mountain hazards, such as debris flows, landslides, and avalanches. These …	debris flow; distribution; hazards; highway; Tibet	-		1
Deep-sea sedimentary record of the late Wisconsin cataclysmic floods from the Columbia River		New results from Ocean Drilling Program Site 1037 and U.S. Geological Survey high-resolution seismic-reflection profiles confirm the great thickness, fast deposition rate, distant source, and convolute path of turbidites that fill the Escanaba Trough, the rift valley of the southernmost segment of the Gorda Ridge. Accelerator mass spectrometry C-14 measurements provide the first direct dating of …		-									1
Deformation of an early Preboreal deposit at Nykvarn (SE sweden) as a result of the bulldozing effect of a grounding iceberg		An early Preboreal glaciomarine deposit near Nykvarn (SE sweden) consists, from bottom to top, of a submarine outwash fall, a full (glacio)marine deposit, and a near-coast marine unit of poorly sorted ice-rafted debris. The top part of the Succession shows soft-sediment deformations that have the same characteristics as material moved forward by a bulldozer. These deformation structures are inter…		-						1
Deglacial and Holocene sediment distribution in Hestvatn, South iceland, derived from a seismic and multibeam survey		More than 100 km of seismic reflection profiles together with a new multibeam survey of the sediment fill in lake Hestvatn, South iceland, reveal two sub-basins filled with up to 44 m of deglacial and Holocene sediment. The chronology is constrained by geochemically characterized tephra layers and radiocarbon dates on marine molluscs. The Vedde Ash and Saksunarvatn Ash provide key chronological c…		-					1
Deglaciation and volcano-seismic activity in Northern iceland: Holocene and early Eemian		The North Volcanic Zone of iceland was unglaciated during most interglacials. Subsequently, the region was covered by the Weich-selian ice cap. A widespread interglacial complex, the Syora Formation, has been mapped in this zone. It covers probably O.I.S.5e, 5d and 5c. Its formation and preservation are discussed in terms of rift and volcanism activity, in interrelations with the former deglaciat…	volcanism; seismites; tephra; deglaciation; NE iceland; Eemian; deglaciations	-					1
Dendrochronology and lichenometry: colonization, growth rates and dating of geomorphological events on the east side of the North Patagonian Icefield, Chile		This paper highlights the importance for dating accuracy of initial studies of delay before colonization for both trees and lichens and tree age below core height, particularly in recently deglaciated terrain where colonization and growth rates may vary widely due to differences in micro-environment. It demonstrates, for the first time, how dendrochronology and lichenometry can be used together i…	dendrochronology; lichenometry; colonization; growth rate; trimline; dating	-											1
Depositional processes and the inferred history of ice-margin retreat associated with the deglaciation of the Cordilleran Ice Sheet: The sedimentary record from Flathead Lake, northwest Montana, USA		A series of piston cores from Flathead Lake, Montana, USA and a new radiocarbon date from the sedimentary record provide the basis for describing sedimentary processes related to deglaciation of the Flathead Lobe of the Cordilleran Ice Sheet and for interpreting the retreat history of the lobe. The oldest part of Flathead Lake sediment core records is Late Pleistocene in age and consists of cm-sc…	Hyperpycnal flows; Event beds; Turbidites; Late Pleistocene; Flathead Lake; Glacial outburst floods; Pro-glacial lake; Cordilleran Ice Sheet; Deglaciation history	-									1
DEPOSITIONAL RECORD OF A GLACIAL-LAKE OUTBURST - GLACIAL LAKE SOURIS, NORTH-DAKOTA		Glacial Lake Souris, located in what is now North Dakota, was inundated by about 74 km3 of sediment-laden water from the outburst of Glacial Lake Regina (Saskatchewan). Glacial-lake outbursts were common during the late Pleistocene, but detailed studies of outburst-deposited sediments in lake environments have not been done. The purpose of this paper is to document the sedimentologic effect of th…		-
Deposits related to the failure of the Malpasset Dam in 1959 An analogue for hyperpycnal deposits from jokulhlaups		Sediment cores collected in the Gulf of Frejus (SE France) contain submarine deposits related to the failure of the Malpasset Dam in 1959. These deposits constitute a dark, sandy terrigeneous layer of 10-40 cm thickness lying above an erosion surface. The deposits are composed of ungraded, non-bioturbated sands and silts displaying no apparent sedimentary structure, but rich in organic matter and…	flood; freezing; inertia flow; jokulhlaup; Malpasset Dam break; surge-flow; SE France	-				1	1
Design flood estimates in mountain streams - the need for a geomorphic approach		Estimates of design flood frequencies are routinely required for engineering purposes on ungauged streams and streams with a limited period of streamflow record. In these cases, the design flood is determined either by rainfall frequency-duration analysis, regional analysis of streamflow data, or by extrapolation of a short record from a gauged stream. Although these types of analyses are valuabl…	debris flows; debris floods; landslide dams; flood hazards; outburst floods; frequency analysis	-
DETAILED AND HIGHLY ACCURATE 3D MODELS OF HIGH MOUNTAIN AREAS BY THE MACS-Himalaya AERIAL CAMERA PLATFORM		Remote sensing in areas with extreme altitude differences is particularly challenging. In high mountain areas specifically, steep slopes result in reduced ground pixel resolution and degraded quality in the DEM. Exceptionally high brightness differences can in part no longer be imaged by the sensors. Nevertheless, detailed information about mountainous regions is highly relevant: time and again g…	3D Model; Himalaya; MACS; Aerial Camera; DEM; Mt. Everest; glacier mass balance; HDR	-		1
Detection of a subglacial lake in Glacier de Tete Rousse (Mont Blanc area, France)		The processes that form intraglacial lakes are poorly understood because of the difficulty in detecting and assessing such hidden lakes. Extensive geophysical surveys were performed between 2007 and 2010 in order to reassess the risk of an outburst flood from Glacier de Tete Rousse, French Alps, where outburst flooding from an intraglacial lake caused 175 fatalities in 1892. Our geophysical surve…		-				1
Development and infill of Vistulian glacial Lake Gniew (N Poland): a sedimentological analysis		A substantial glaciolacustrine unit in northern Poland, between the valleys of the Vistula and Wierzvca rivers, was deposited in glacial Lake Gniew during the climatic amelioration of the Late Vistulian. It covers an area of 35 km(2) and has an average thickness of 7 in, but locally reaches over 20 m. Four sedimentary facies are distinguished. The silty/clayey rhythmites of facies A are interpret…	Vistulian; glacial lake; sedimentology; glaciolacustrine deposits; massive clay; jokulhlaup	-
DEVELOPMENT OF GLACIAL LAKE INVENTORY IN Bhutan USING "DAICHI" (ALOS)		The objective of this study is to develop new glacial lake inventory to understand existing condition using the optical imageries of the Panchromatic Remote-sensing Instrument for Stereo Mapping (PRISM) and the Advanced Visible and Near Infrared Radiometer type 2 (AVNIR-2) onboard the Advanced Land Observing Satellite (ALOS, nicknamed "Daichi"). Glacial lakes can be caused outburst flood when nat…	ALOS; Daichi; PRISM; AVNIR-2; DSM; glacial lake; cryosphere	-		1
Digital landscapes of deglaciation: identifying Late Quaternary glacial lake outburst floods using LiDAR		High resolution DEMs obtained from LiDAR topographic data have led to improved landform inventories (e.g. landslides and fault scarps) and understanding of geomorphic event frequency. Here we use airborne LiDAR mapping to investigate meltwater pathways associated with the Tweed Valley palaeo ice-stream (UK). In particular we focus on a gorge downstream of Palaeolake Milfield, previously mapped as…	LiDAR; geomorphological mapping; glacial lake outburst floods; Late Quaternary; landscape evolution	-
Discovery of relict subglacial lakes and their geometry and mechanism of drainage		Recent proxy measurements reveal that subglacial lakes beneath modern ice sheets periodically store and release large volumes of water, providing an important but poorly understood influence on contemporary ice dynamics and mass balance. This is because direct observations of how lake drainage initiates and proceeds are lacking. Here we present physical evidence of the mechanism and geometry of l…		-									1
Discussion of 'Field evidence and hydraulic modeling of a large Holocene jokulhlaup at Jokulsa a Fjollum channel, iceland' by Douglas Howard, Sheryl Luzzadder-Beach and Timothy Beach, 2012		This paper discusses Howard et al. (2012) who reconstruct the peak discharge of a glacial outburst flood, or jokulhlaup', for part of the jokulsa a Fjollum in north-central iceland. They propose that this flood was the largest on Earth. We consider that the magnitude of the jokulhlaup proposed by Howard et al. (2012) warrants much more robust field evidence and demands more carefully parameterise…	Jokulsa a Fjollum; iceland; Outburst flood; Landscape; Hydraulics	-					1
Discharge and suspended sediment dynamics during two jokulhlaups in the Skafta river, iceland		This paper investigates the dynamics and significance of discharge and suspended sediment transport (SST) during two jokulhlaups (glacier outburst floods) in the Skafta River, south iceland. Jokulhlaups occur frequently in many glacial environments and are highly significant in the gemorphological evolution of river basins and coastal environments. However, direct high-resolution monitoring of jo…	iceland; glacial outburst floods; jokulhlaup; suspended sediment; turbidity; discharge; volcanic activity; steam explosions	-					1
Discharge magnitude and frequency as a control on proglacial fluvial sedimentary systems		Recent work on active, inactive and Quaternary proglacial outwash plains or sandur, subjected to contrasting magnitude and frequency regimes has yielded new insights into the controls on sandur evolution. This paper provides a review of recent research on magnitude and frequency in proglacial systems. The primary objective of this paper is to demonstrate that sandur influenced by repeated high ma…	sandur; braided river; jokulhlaup; floods; glacial meltwatcr; sedimentology; geomorphology; iceland	-					1
Distinguishing high surf from volcanic long-period earthquakes		Repeating long-period (LP) earthquakes are observed at active volcanoes worldwide and are typically attributed to unsteady pressure fluctuations associated with fluid migration through the volcanic plumbing system. Nonvolcanic sources of LP signals include ice movement and glacial outburst floods, and the waveform characteristics and frequency content of these events often make them difficult to …	Long-period seismicity; volcanoes; infrasound; surf	-
Distribution and interannual variability of supraglacial lakes on debris-covered glaciers in the Khan Tengri-Tumor Mountains, Central Asia		Supraglacial lakes are widely formed on debris-covered glaciers in the Khan Tengri-Tumor Mountains (KTTM), Tianshan, Central Asia. Study of their distribution characters based on regional-wide remote sensing investigations is still lacking, but it can promote our understanding about the influence of supraglacial lakes on the surface melting, hydrology and dynamics of debris-covered glaciers in th…	remote sensing; supraglacial lake; Glaciology; debris-covered glacier; Khan Tengri-Tumor Tianshan	-	1
Documentary and tree-ring evidence for a long-term interval without ice impoundments from Glaciar Perito Moreno, Patagonia, Argentina		Glaciar Perito Moreno (hereafter GPM; 50 degrees 30' S and 72 degrees 50' W) is a major outlet glacier from the South Patagonia Icefield. In contrast to most Patagonian glaciers, glaciological studies indicate that GPM has been advancing or remained stable during the 20th century. The advances periodically block Canal de los Tempanos creating an ice dam that impounds Brazo Sur-Rico arms of Lago A…	environmental history; ice dams and floods; late Holocene; tree-ring analysis	-											1
Drainage events from a glacier-dammed lake, Bear Glacier, alaska: Remote sensing and field observations		We investigated drainage events from a glacier-dammed lake on Bear Glacier, alaska, and associated outburst floods and hazards. The glacier-dammed lake, which we call Ice Lake, is 17.5 km up-glacier from Bear Glacier's terminus at Bear Glacier Lake. We combine field observations and remote sensing to examine temporal changes in the size of Ice Lake, the frequency and timing of its drainage, and d…	Glacial lake outburst flood; Jokulhlaups; Hazards; Proglacial lake; Ice-dammed lake; Normalized-difference water index	-							1
Drainage of a glacial lake through an ice spillway		Debris cover on glacier surfaces forms topography that can trap water in surface lakes. Such lakes may overflow and drain by melting a gorge through a low point in the ice barrier. If the spillway elevation melts downward faster than the lake level drops, a rapid (unstable) discharge results. We show that unstable discharge will occur when the area of the lake exceeds a critical area evaluated in…		-							1
Drainage system behaviour of a High-Arctic polythermal glacier		Measurements made at John Evans Glacier, eastern Ellesmere Island, Nunavut, Canada in 1994 and 1996 provide new insight into the internal hydrology of polythermal glaciers. During the early part of each melt season, supraglacial waters enter the glacier via a crevasse field about dr km from the terminus and are stored in a subglacial reservoir. Release of the water from the reservoir occurs initi…		-									1
Dye tracing a jokulhlaup: I. Subglacial water transit speed and water-storage mechanism		We present results of an investigation of two jokulhlaups (glacial lake outburst floods) at Gornergletscher, Switzerland, using dye-tracer experiments and complementary hydrological measurements. Repeated dye injections into moulins showed that tracer transit speeds were larger after the lake had emptied, but when proglacial discharge was still high, than during the main phase of the jokulhlaup. …		-				1
Dye tracing a jokulhlaup: II. Testing a jokulhlaup model against flow speeds inferred from measurements		Observational data allowing the validation of jokulhlaup models are sparse. We were able to inject dye tracer directly into the drainage channel of a glacial lake during the onset of its outburst. This made it possible to test an established jokulhlaup model, not only against discharge measurements, but for the first time also against water flow speeds inferred from measurements. We drive the jok…		-
Dynamic distributed drainage implied by the flow evolution of the 1996-1998 Adventure Trench subglacial lake discharge		The transport of subglacial water beneath the East antarctic Ice Sheet is an enigmatic and difficult to observe process which may affect the flow of the overlying ice and mixing of the oceans in the sub ice shelf cavities, and ultimately global climate. Periodic outbursts are a critical mechanism in this process. Recent analysis of satellite data has inferred a subglacial hydraulic discharge tota…	East antarctica; subglacial lakes; jokulhlaup; radar; Adventure Subglacial Trench; hydrology; ice-ocean interactions; polar science; remote sensing; climate change; sea level; ice shelf; cryosphere	-
Dynamic simulation of catastrophic late Pleistocene glacial-lake drainage, Altai Mountains, central Asia		Numerical simulations of the catastrophic draining of Pleistocene glacial-lake Kuray-Chuja quantify the discharge history of the draining event in detail. The plan-view basin flows are modelled as water emptied due to the instantaneous failure of the impounding ice-dam when the lake was at maximum capacity. The Chuja Basin water exited as a jet-flow into the Kuray Basin via a narrow conjoining va…	lake drainage; catastrophic floods; gravel bedforms; Altai Mountains; Siberia	-
Dynamics of subglacial floods		The Nye model of jokulhlaups is able to explain both their periodicity and even the detailed shape of the flood hydrograph. In this paper, we show how the model can be used to predict the shape of the hydrographs from the subglacial lake Grimsvotn beneath Vatnajokull in iceland, and we comment on three particular issues that have proved contentious in the application of the Nye model: the role of…	jokulhlaups; Grimsvotn; Vatnajokull; Nye model	-					1
Early recognition of glacial lake hazards in the Himalaya using remote sensing datasets		Glacier recession in high-Himalayan catchments leads to the formation of moraine-dammed lakes on many debris-covered glacier tongues. Such lakes are hazardous to communities and infrastructure downstream because of their potential to breach catastrophically, and their early recognition is required if remedial efforts are to be timely and cost-effective. Whilst the development of supraglacial lake…	supraglacial lakes; hazard development; outburst flood; interferometry; remote sensing; Himalaya	-		1
Early to mid-Holocene Atlantic water influx and deglacial meltwater events, Beaufort Sea slope, Arctic Ocean		Holocene high-resolution cores from the margin of the Arctic Ocean are rare. Core P189AR-P45 collected in 405-m water depth on the Beaufort Sea slope, west of the Mackenzie River delta (70degrees33.03' N and 141degrees52.08' W), is in close vertical Proximity to the present-day upper limit of modified Atlantic water. The 5.11-m core spans the interval between similar to 6800 and 10,400 C-14 yr B.…	Beaufort sea; Artic Ocean; Atlantic water; early Holocene	-									1
Early Warning of Glacial Lake Outburst Floods and Climate Change Monitoring, YarkantRiver, PR China		The catchment area of YarkantRiver is located in the KarakoramMountains in the southwest of Xinjiang Uygur Autonomous Region, P.R. China. In the last decades, several glacial lake outburst floods (GLOF) damaged infrastructure and claimed human lives along YarkantRiver in the TarimBasin. The spontaneous floods are a threat to over 1 Mio inhabitants in the floodplains of Yarkant River and are causi…	Glacial Lake Outburst Flood (GLOF); Early Warning System; Remote sensing; Risk management; Climate Change monitoring	-			1
Earth analog for high-latitude landforms and recent flows on mars: Icy debris fans in the Wrangell Volcanic Field, alaska		New mars Reconnaissance Orbiter HiRise and CRISM imagery of polar layered terrain of mars reveals striking similarities to icy debris fans along the base of steep escarpments in alaska formed in high-latitude periglacial environments. Process and morphologic observations of a deglaciating site in the Wrangell Mountains reveal a complex suite of supraglacial processes involved in the construction …	Earth; mars; mars, polar geology; Geological processes; mars, surface; mars, polar caps	-							1
Effects of glacier retreat on the outbursts of Goesvatnet, southwest Spitsbergen, svalbard		Effects of the retreat of Gasbreen, southwest Spitsbergen, svalbard, on the evolution of the ice-dammed lake Goesvatnet are shown for the period 1899-1991. The retreat and lowering of the damming ice masses have changed not only the stored lake volume, the lake geometry and the elevation, slope and length of the subglacial outlet tunnel, but also the frequency and magnitude of outburst floods of …		-
EFFECTS OF ICE-FRONT COLLAPSE AND FLOOD GENERATION ON A PROGLACIAL RIVER CHANNEL NEAR KANGERLUSSUAQ (SONDRE-STROMFJORD), WEST Greenland		River discharge measurements downstream of the Russell Glacier, near Kangerlussuaq (Sondre Stromfjord), West Greenland revealed the occurrence of short-term discharge fluctuations during the 1991 melt season. Frontal ice-cliff collapse results in temporary river damming, producing initial decreases in discharge and subsequent sudden hood peaks on dam failure. Fluctuations are less than two hours …	ICE FRONT COLLAPSE; FLOOD GENERATION; SONDRE STROMFJORD; Greenland	-								1
EFFECTS OF RIVER MORPHOLOGICAL CHANGE ON INUNDATION MODELLING DURING EXTREME FLOOD SEQUENCES		Flooding modelling has generally concentrated on clear-water simulation without the incorporation of morphological change. However, field evidence shows that extreme floods can cause significant changes in the river channel. Increasingly attention has been paid to the influences of morphological changes within floods. Yet, the significance of morphological changes on inundation modelling is still…	Morphological change; inundation modelling; outburst flood; flood sequences	-					1
Effects of seismic surge waves and implications for moraine-dammed lake outburst		Moraine dams usually collapse due to overtopping by the surge wave in the dammed lake, and the surge wave is most likely caused by an earthquake. The seismic water wave (SWW) is a major factor causing the dam to break in the earthquake zone. This paper focused on the SWW by model experiments with a shaking water tank under conditions of various water depths, seismic waves, and peak ground acceler…	seismic water wave; shaking water tank experiment; seismic wave; moraine-dammed lake outburst	-
Effects of subglacial geothermal activity observed by satellite radar interferometry		We use one day Synthetic Aperture Radar (SAR) interferograms from data of the Earth Remote Sensing Satellites ERS-1 and ERS-2 to study ice how and uplift of two surface depressions within the Vatnajokull ice cap, iceland. The ice cauldrons are created by melting at subglacial geothermal areas. Meltwater accumulates in a reservoir under the cauldrons over 2 to 3 years until it drains in a jokulhla…		-					1
Efficacy of bedrock erosion by subglacial water flow		Bedrock erosion by sediment-bearing subglacial water remains little-studied; however, the process is thought to contribute to bedrock erosion rates in glaciated landscapes and is implicated in the excavation of tunnel valleys and the incision of inner gorges. We adapt physics-based models of fluvial abrasion to the subglacial environment, assembling the first model designed to quantify bedrock er…		-
Empirical modelling of outburst flood hydrographs		Naturally impounded lakes dammed by earth material like moraines and landslide deposits or glacier ice are capable of draining abruptly involving enormous amounts of water by overflow, seepage or drainage through pipes. Such kinds of outburst floods are among the largest floods by magnitude and provide a serious hazard due to their frequently unexpected occurrence. A new model approach based on p…	hydrograph; regression equations; normalisation; flood duration; GLOF	-
Energy expenditure and geomorphic work of the cataclysmic Missoula flooding in the Columbia River Gorge, USA		Cataclysmic releases from the glacially dammed Lake Missoula, producing exceptionally large floods, have resulted in significant erosional processes occurring over relatively short time spans. Erosional landforms produced by the cataclysmic Missoula floods appear to follow a temporal sequence in many areas of eastern Washington State. This study has focused on the sequence observed between Celilo…	floods; palaeohydrology; stream power; Missoula flooding	-									1
Erosion and deposition in the proglacial zone: the 1996 jokulhlaup on Skeioararsandur, southeast iceland		The November 1996 jokulhlaup from Skeioararjokull Glacier, iceland, had little impact on the proximal surface of Skeioararsandur, though most channel change occurred in the proximal zone. Patterns of erosion and deposition were revealed by aerial photography, repeat-pass interferometry and field survey. The jokulhlaup bypassed the proximal zone because meltwater ponded in an ice-marginal depressi…	sandur; iceland; interferometry; jokulhlaup; proglacial zone	-					1
Erosion and morphology of a debris flow caused by a glacial lake outburst flood, Western norway		This article documents a 240,000-m(3) debris flow resulting from a glacial lake outburst flood in Fjaerland, Western norway, May 8, 2004. The event started when a glacial lake breached a moraine ridge. The ensuing debris flow was able to erode material along its path, increasing in volume from about 25,000 to 240,000 m(3) before depositing about 3 km from its starting point. Field investigations,…	debris flow; erosion; entrainment; glacier hazard; Fjaerland; norway	-						1
Erosion during extreme flood events dominates Holocene canyon evolution in northeast iceland		Extreme flood events have the potential to cause catastrophic landscape change in short periods of time (100 to 103 h). However, their impacts are rarely considered in studies of long-term landscape evolution (>10(3) y), because the mechanisms of erosion during such floods are poorly constrained. Here we use topographic analysis and cosmogenic He-3 surface exposure dating of fluvially sculpted su…	bedrock erosion; extreme floods; knickpoints; iceland; cosmogenic He-3	-					1
Erosion of the Tsangpo Gorge by megafloods, Eastern Himalaya		At the southeastern margin of the Tibetan Plateau, the Yarlung-Tsangpo River plunges through the Himalaya to drop >2 km through the Tsangpo Gorge. Upstream, relict glacial dams and impounded lake terraces suggest that Quaternary lakes as large as 800 km(3) catastrophically drained through the gorge as megafloods. We report on new megaflood deposits downstream of the gorge and use detrital zircon …		-		1
ESTIMATES OF THE MAGNITUDE OF GLACIER OUTBURST FLOODS FROM LAKE DONJEK, Yukon-TERRITORY, Canada				-									1
Estimating millennial-scale rates of dust incorporation into eroding hillslope regolith using cosmogenic nuclides and immobile weathering tracers		Dust fluxes are of wide interest because of the effects of dust on climate, oceanic primary productivity, terrestrial biogeochemical cycles, and regolith composition. Estimating long-term dust deposition rates, however, can be difficult, especially in steep, eroding terrain. Here we present a geochemical mass balance method for estimating long-term average rates of dust incorporation into regolit…		-
Estimating Spatial and Temporal Variability in Surface Kinematics of the Inylchek Glacier, Central Asia, using TerraSAR-X Data		We use 124 scenes of TerraSAR-X data that were acquired in 2009 and 2010 to analyse the spatial and temporal variability in surface kinematics of the debris-covered Inylchek Glacier, located in the Tien Shan mountain range in Central Asia. By applying the feature tracking method to the intensity information of the radar data and combining the results from the ascending and descending orbits, we d…	Inylchek glacier; TerraSAR-X; feature tracking; seasonal surface kinematics; glacial lake outburst flood	-	1
Estimating the Characteristics of Runoff Inflow into Lake Gojal in Ungauged, Highly Glacierized Upper Hunza River Basin, Pakistan		Motivated by the potential flood outburst of Lake Gojal in the ungauged highly glacierized (27%) upper Hunza River Basin (HRB) in Pakistan that was dammed by a massive landslide on 4 January 2010, we attempt to analyze the characteristics of water inflow to the lake employing remote sensing data, two hydrological models, and sparsely observed data. One of the models (Model I) is a monthly degree-…	ungauged; glacierized; runoff modeling; sensitivity analysis	-
Estimating the inundation area of a massive, hypothetical jokulhlaup from northwest Vatnajokull, iceland		Jokulhlaups are the consequence of a sudden and significant release of meltwater from the edge of a glacier. Such floods are sourced commonly from ice-dammed lakes, but occasional volcanic eruptions beneath ice can produce intense jokulhlaups due to prodigious rates of meltwater release. Globally, volcanogenic jokulhlaups have caused fatalities and damage to infrastructure within effected catchme…	glacial outburst flood; iceland; hydraulic modelling; GIS	-					1
Estimating the volume of Alpine glacial lakes		Supraglacial, moraine-dammed and ice-dammed lakes represent a potential glacial lake outburst flood (GLOF) threat to downstream communities in many mountain regions. This has motivated the development of empirical relationships to predict lake volume given a measurement of lake surface area obtained from satellite imagery. Such relationships are based on the notion that lake depth, area and volum…		-
Estimation of erosion, deposition, and net volumetric change caused by the 1996 Skeioararsandur jokulhlaup, iceland, from synthetic aperture radar interferometry		Using repeat-pass satellite synthetic aperture radar interferometry, we develop a methodology to measure flood-induced erosion and deposition and apply it to a record 1996 glacier outburst flood (jokulhlaup) on Skeioararsandur, iceland. The procedures include (1) coregistration of backscatter intensity images to observe morphological differences; (2) mapping of interferometric phase correlation t…		-					1
ESTIMATION OF GLACIER LAKE OUTBURST FLOOD AND ITS IMPACT ON A HYDRO-PROJECT IN Nepal				-		1
Eurasian catastrophic floods: The Tsasuchei jokulhlaup in southern Transbaikalia				-
Evaluating the growth characteristics of a glacial lake and its degree of danger of outburst flooding: Imja Glacier, Khumbu Himal, Nepal		The Imja Glacier Lake (Imja Tsho) (1.03 km2 in 2007) is repeatedly cited as one of the most dangerous glacial lakes in the Himalaya with a glacial lake outburst flood (GLOF) claimed to be imminent. Knowledge of lake development and its dynamics, however, is limited and forecasts of a possible outburst are not scientifically based. Nevertheless, prospects for such a catastrophe are repeatedly exag…	glacial lake; glacial lake outburst flood (GLOF); Himalaya; Imja Glacier; Imja Tsho; Khumbu Himal	-		1
Evaluation of ASTER GDEM and SRTM and their suitability in hydraulic modelling of a glacial lake outburst flood in southeast Tibet		The resolution and accuracy of digital elevation models (DEMs) can affect the hydraulic simulation results for predicting the effects of glacial lake outburst floods (GLOFs). However, for the Tibetan Plateau, high-quality DEM data are often not available, leaving researchers with near-global, freely available DEMs, such as the Advanced Spaceborne Thermal Emission and Reflection Radiometer Global …	ASTER GDEM; SRTM; HEC-RAS; glacial lake outburst flood; hydraulic modelling	-
Evaluation of different freshwater forcing scenarios for the 8.2 ka BP event in a coupled climate model		To improve our understanding of the mechanism causing the 8.2 ka BP event, we investigated the response of ocean circulation in the ECBilt-CLIO-VECODE (Version 3) model to various freshwater fluxes into the labrador Sea. Starting from an early Holocene climate state we released freshwater pulses varying in volume and duration based on published estimates. In addition we tested the effect of a bas…		-
Evaluation of glacial outburst flood hypothesis for the Big Lost River, Idaho		Geomorphic evidence along the Big Lost River in Idaho suggests that a catastrophic flood likely occurred earlier than previously thought. Previous researchers described flood-related features in the Box Canyon area and suggested that a large flood might have originated about 20 to 30 ka from Glacial Lake East Fork, about 100 kin upstream of Box Canyon. Geomorphic mapping of glacial till and outwa…		-
EVALUATIONS FOR POTENTIAL OF GLACIAL LAKE OUTBURST FLOODS (GLOFS) IN THE Bhutan Himalaya USING PRISM AND AVNIR-2 ONBOARD ALOS		The objectives of this study are to validate generated Digital Surface Models (DSMs) by PRISM onboard the Advanced Land Observing Satellite (ALOS, nicknamed "Daichi") in snow and glacier regions to contribute to the evaluation of potential Glacial Lake Outburst Floods (GLOFs) and their mitigation in the Bhutan Himalaya. Glacial lake inventory will also be generated to investigate the expansion pr…	Hazards; Hydrology; DEM/DTM	-		1					1
Evidence for Holocene megafloods down the Tsangpo River Gorge, southeastern Tibet		Lacustrine and alluvial terraces and sediments record the extent of at least two Holocene glacially dammed lakes immediately upstream of the Tsangpo River gorge at the eastern syntaxis of the Himalaya. The larger lake covered 2835 km(2), with a maximum depth of 680 m and contained an estimated 832 km 3 of water; the smaller lake contained an estimated 80 km(3) of water. Radiocarbon dating of wood…	outburst floods; Tsangpo River; Himalaya; Namche Barwa; paleolakes	-		1
Evidence for Mountain Glacier Changes in Semi-arid Environments based on Remote Sensing Data		Countries like Iran, which are geographically situated in a rather arid and warm regions, will suffer more from global warming than countries located in humid and semi-humid regions. In such environments, analyzing the variations of mountain glaciers can reveal several aspects of climate change patterns more efficiently in comparison to the other geo-indicators. The present study reports some evi…	Arid environments; Mountain glaciers; Supra-glacial Lake; Debris-free area; Object oriented classification	-
Evidence for rapid sedimentation in a tunnel channel, Oak Ridges Moraine, southern Ontario, Canada		In south-central Ontario, a Late Wisconsinan regional unconformity consisting of tunnel channels and drumlinized till crops out north of Lake Ontario. The tunnel channels are locally infilled and the unconformity buried by sediment of the Oak Ridges Moraine. Based on seismic reflection profiling and drillcore, the tunnel channels are known to continue beneath the moraine. Detailed sedimentologica…	glaciation; tunnel channel; subglacial processes; moraine; Ontario; Canada	-									1
EVIDENCE, AGE, AND THICKNESS OF A FROZEN PALEOLAKE IN UTOPIA-PLANITIA, mars		Recent mapping studies west of Elysium Mons, mars, have pinpointed subice features that suggest the existence of a frozen paleolake in Utopia Planitia as recently as 1.8 billion years ago. The subice features are interpreted to be hyaloclastic ridges and hills, table mountains, associated jokulhlaup deposits, and fluvial channels. Photoclinometric studies of these features and of a basal scarp ar…		-
Evolution and outburst risk analysis of moraine-dammed lakes in the central Chinese Himalaya		The recent evolution and outburst risk of two typical moraine-dammed lakes, Galong and Gangxi, central Chinese Himalaya, are analyzed using topographic maps from 1974 and Landsat satellite imagery acquired in 1988, 2000 and 2014. The datasets show the areas of Galong and Gangxi lakes increasing at rates of 0.45 and 0.34 km(2)/year during the period 1974-2014, an expansion of 501% and 107%, respec…	Moraine-dammed lake; recent evolution; outburst risk analysis; central Chinese Himalaya	-		1
Evolution of Eureka Flat: A dust-producing engine of the Palouse loess, USA		Seclimentologic, stratigraphic, and pedologic evidence demonstrates that Eureka Flat (EF), a narrow, 80-km-long deflation plain in south-central Washington, USA, is the source for the thick and widespread loess of the Palouse region. Located in the southern Columbia Plateau, EF has been a depocenter for abundant clay-to-sand-sized sediment derived from repeated glacial outburst floods that swept …		-									1
Evolution of glacial lakes from the Northern Patagonia Icefield and terrestrial water storage in a sea-level rise context		An increase of glacial lake area of 66.0 km(2) has been measured at the periphery of the Northern Patagonia Icefield (NPI) between 1945 and 2011. Results have been obtained by digitizing the glacial lakes from Lliboutry's topographic map and from various multitemporal Landsat satellite scenes (1976, 1987, 2001 and 2011). This first complete glacial lake inventory of the NPI indicates a total lake…	Patagonia; glacial lake; terrestrial water storage; sea level rise	-											1
Evolution of glacier-dammed lakes through space and time; Brady Glacier, alaska, USA		Glacier-dammed lakes and their associated jokulhlaups cause severe flooding in downstream areas and substantially influence glacier dynamics. Brady Glacier in southeast alaska is well suited for a study of these phenomena because it presently dams 10 large (>1 km(2)) lakes. Our objectives are to demonstrate how Brady Glacier and its lakes have co-evolved in the past and to apply this knowledge to…	Tidewater glacier; Glacier-dammed lake; Remote sensing; Brady Glacier; Glacier fluctuation	-							1
Evolution of the Eastern flank of the North Patagonian Ice Field: The deactivation of the Deseado River (Argentina) and the activation of the Baker River (Chile)		Patagonia had significant morphological changes when moraines at the foot of the Andes caused reversals in the drainage of rivers that crossed flat plateaus. Several examples of such basins are known from evidences of misfit valleys and the activation of short watersheds with rapids. The Deseado River drained the second largest lake of South america (Buenos Aires-General Carrera) and another glac…	drainage reversals; glacial-lake outbursts floods; North Patagonian Ice Field; subduction of active ridge	-											1
Expansion of glacier lakes in recent decades in the Bhutan Himalayas		An inventory of glacier lakes was compiled based on observations carried out for 30 glacier lakes in the northern and northwestern parts of Bhutan in autumn 1998. Risk assessments for glacier lake outburst floods were made for these glacier lakes. Historical variations of glacier lakes and glacier termini were examined using photographs, satellite images, maps and published observations. In the n…		-		1
Experimental insights on geomorphological processes within dam break outburst floods		Hydraulic behavior and unsteady sediment transport within dam break outburst floods are inherently inter-dependent, yet poorly constrained. This study experimentally determined how the mobility and clast size of channel bed sediments affected the peak flow depth and flow velocities, wave propagation and attenuation, sediment entrainment and duration of transport, flood power, energy transfer and …	Dam break; Outburst flood; Flash flood; Flume; Clast size; Sediment transport	-
Experimental studies of heat transfer at the dynamic magma ice/water interface: Application to subglacially emplaced lava		Experiments simulating processes operating in volcano-ice interactions were carried out to explain and quantify lava thermal properties and processes of heat transfer from pure lava melt to water and ice and from hot crystalline lava to water. The samples used (70-200 g) were obtained from an intermediate lava flow (benmoreite-trachyte) that was emplaced under and within the outlet glacier Gigjok…		-
Explosive rhyolite tuya formation: classic examples from Kerlingarfjoll, iceland		Rhyolite eruptions in iceland mostly take place at long-lived central volcanoes, examples of which are found associated with each of the present-day rift-zone ice caps. Subglacial eruptions at Merlingarfjoll central volcano produced rhyolite tuyas that are notable for their exposures of early-erupted pyroclastic material. Observations from a number of these edifices are synthesised into a general…		-					1
Extensive deposits on the Pacific plate from Late Pleistocene North american glacial lake outbursts		One of the major unresolved issues of the Late Pleistocene catastrophic-flood events in the northwestern United States (e.g., from glacial Lake Missoula) has been what happened when the flood discharge reached the ocean. This study compiles available 3.5-kHz high-resolution and airgun seismic reflection data, long-range sidescan sonar images, and sediment core data to define the distribution of f…		-									1
Extreme events in streams and rivers in arctic and subarctic regions in an uncertain future		We review the predicted changes in extreme events following climate change in flowing waters in arctic and subarctic regions. These regions are characterised by tundra or taiga ecosystems in either erosional or depositional glacial landforms or presently glacierised areas of the Northern Hemisphere. The ecological and geomorphic effects of extreme meteorological and hydrological events, such as e…	climate change; extreme events; floods; permafrost; rivers	-
Fault-dominated deformation in an ice dam during annual filling and drainage of a marginal lake		Ice-dammed Hidden Creek Lake, alaska, USA, outbursts annually in about 2-3 days. As the lake fills, a wedge of water penetrates beneath the glacier, and the surface of this 'ice dam' rises; the surface then falls as the lake drains. Detailed optical surveying of the glacier near the lake allows characterization of ice-dam deformation. Surface uplift rate is close to the rate of lake-level rise wi…		-							1
Field evidence and hydraulic modeling of a large Holocene jokulhlaup at Jokulsa a Fjollum channel, iceland		Field investigation and hydraulic modeling of the Jokulsa a Fjollum outflow channel in the northern highlands of iceland suggest a larger than previously modeled jokulhlaup catastrophic release of glacial floodwaters probably occurring just after early Holocene deglaciation. Although earlier investigations described a similar large paleoflood event, our hydraulic model parameter estimates and flo…	Jokulhlaup; Paleohydrology; Paleofloods; Hydraulic modeling; iceland; mars	-					1
Flash floods due to glacier lake outburst floods in the mountainous regions of Nepal: A case study of Kawache Glacier Lake outburst flood		Natural disasters like Glacier Lake Outburst Flood (GLOF) severely disrupt livelihoods, infrastructures and community development whether they occur at the large or medium scale. The latest GLOF occurred in the head reach of Madi River, a main tributary of Gandaki River. From 1954 to 2002, floods have affected over a million people in Nepal. The episode of Kawache Glacier Lake Outburst Flood that…	Flash floods; glacier; global warming; landslides; temperature	-		1
Flash floods in mountain areas		The main causes of flash floods in mountain areas are cloud bursts or stationary rainfall, heavy rainfall and rapid snow melt in high mountain areas, glacial lake outbursts, failure of dams built up by landslides, rock falls or debris flows, and overspill following the failure of water power reservoir dams. The sudden rise and rapid fall of water levels, as well as the high flow velocities combin…	flash floods; extreme precipitation; debris flows; hazard maps; flood risk management; Switzerland	-				1
Flood disasters and insurance		Worldwide, flood is the number one cause of losses from natural events. Flood insurance has attracted more and more attention in recent years, not only in the fields of science and politics but also within the insurance industry itself. Although the list of great natural disasters is headed by storms, and despite the relatively low density of insurance against flooding, the large number of local …		-
Flood from Grimsvotn subglacial caldera 1996: Composition of suspended matter		Since the settlement of iceland (870 AD) at least 80 subglacial volcanic eruptions have been reported, many of them causing tremendous outburst floods or jokulhlaups. The 1996 Gjalp subglacial eruption under the Vatnajokull ice cap triggered a catastrophic jokulhlaup. During the eruption 3 km of ice were melted. The meltwater flowed along the glacier bed into the Grimsvotn caldera lake for five w…		-					1
Flow dynamics, sedimentation and erosion of glacial lake outburst floods along the Middle Pleistocene scandinavian Ice Sheet (northern central Europe)		During the Middle Pleistocene late Saalian glaciation of northern central Europe numerous pro-glacial lakes formed along the southwestern margin of the scandinavian Ice Sheet. Little is known about the drainage history of these lakes, the pathways of glacial lake outburst floods and their impacts on erosion, sedimentation and landscape evolution. This study investigated the impact of the late Saa…		-
Flow hydraulics and geomorphic effects of glacial-lake outburst floods in the Mount Everest region, Nepal		Glacial-lake outburst floods (GLOFs) on 3 September 1977 and 4 August 1985 dramatically modified channels and valleys in the Mount Everest region of Nepal by eroding, transporting, and depositing large quantities of sediment for tens of kilometres along the flood routes. The GLOF discharges were 7 to 60 times greater than normal floods derived from snowmelt runoff, glacier meltwater, and monsoona…	geomorphic effects; specific stream power; glacial-lake outburst floods	-		1
Fluvial-lacustrine interaction on Skeioararsandur, iceland: implications for sandur evolution		A complex assemblage of fluvial and lacustrine sediments is identified in a major section through proglacial sediments on Skeioararsandur. south iceland, High magnitude-low frequency events are identified in both the fluvial and lacustrine sediments. However, much of the sedimentary succession is composed of 'normal' low magnitude-high frequency sediments. Retreat of Skeioararjokull following a s…	proglacial sedimentology; braided rivers; glaciofluvial; glaciolacustrine	-					1
FORMATION OF A STRANDLINE DURING THE 1984 JOKULHLAUP OF STRANDLINE LAKE				-
Formation of kettle holes following a glacial outburst flood (jokulhlaup), Skeioararsandur, southern iceland		The 1996 jokulhlaup on Skeioararsandur, southern iceland, involved the transport of ice blocks released from the glacier margin. The morphology, sedimentology and spatial distribution of kettle holes and other ice-block-related features, which developed post-flood in this proglacial fluvial system, were examined. Four types of phenomena are described and explained: kettle chains orientated both p…	kettlehole; jokulhlaup; ice block; iceland; glacier; sandur; morphology; sedimentology	-					1
Formation of paleovalleys in the Central Himalaya during valley aggradation		The formation of paleovalleys in mountainous regions is considered to result from extreme events such as landslides and glacial or landslide lake outburst floods. According to IPCC (2012) the extreme events are rarest of the rare weather/climatic events when the climate/weather variable is significantly above or below the defined threshold value. The present study suggests that paleovalleys can a…	Paleovalley; Alaknanda River; Quaternary; Sedimentary facies; Himalaya	-		1
FORMER GLACIAL LAKES IN THE DEE VALLEY - ORIGIN, DRAINAGE AND SIGNIFICANCE		Detailed geomorphological and sedimentological evidence is presented for a series of ice-marginal lakes in tributary valleys of lower Deeside. They developed during ice-sheet deglaciation due to damming by glacier ice which remained in the main valley. Drainage of these lakes occurred by both marginal and subglacial routes; in the latter case, the sudden outburst may be responsible for anomalousl…		-
Fractures as the main pathways of water flow in temperate glaciers		Understanding the flow of water through the body of a glacier is important, because the spatial distribution of water and the rate of infiltration to the glacier bottom is one control on water storage and pressure, glacier sliding and surging, and the release of glacial outburst floods(1 - 3). According to the prevailing hypothesis, this water flow takes place in a network of tubular conduits(4,5…		-						1
Fracturing and sediment deposition at the glacier surface by Jokulhlaups: a common occurrence				-
FREQUENT OUTBURST FLOODS FROM SOUTH TAHOMA GLACIER, MOUNT-RAINIER, USA - RELATION TO DEBRIS FLOWS, METEOROLOGICAL ORIGIN AND IMPLICATIONS FOR SUBGLACIAL HYDROLOGY		Destructive debris flows occur frequently at glacierized Mount Rainier volcano, Washington, U.S.A. Twenty-three such flows have occurred in the Tahoma Creek valley since 1967. Hydrologic and geomorphic evidence indicate that all or nearly all of these flows began as outburst floods from South Tahoma Glacier. Flood waters are stored subglacially. The volume of stored water discharged during a typi…		-									1
Fresh arguments against the Shaw megaflood hypothesis. A reply to comments by David Sharpe on "Paleohydraulics of the last outburst flood from glacial Lake Agassiz and the 8200 BP cold event"				-									1
Freshwater Discharge, Sediment Transport, and Modeled Climate Impacts of the Final Drainage of Glacial Lake Agassiz		A cold event at around 8200 calendar years BP and the release, at around that time, of a huge freshwater outburst from ice-dammed glacial Lake Agassiz have lent support to the idea that the flood triggered the cold event. Some suggest that the freshwater addition caused a weakening of the North Atlantic meridional overturning circulation (MOC) thereby reducing the ocean transport of heat to high …		-									1
Freshwater megaflood sedimentation: What can we learn about generic processes?		There is growing recognition that sedimentary deposits related to high-energy, large-scale, freshwater floods are widespread across the continents and, in the main, can be related to Quaternary outbreak flows from ice-dammed lakes. Such deposits may also occur in the Neogene and earlier. Recognition of these 'megaflood' deposits is hindered by the lack of well-conditioned stratigraphic models of …	Megaflood; Megaflood sedimentation; Giant bar; Rhythmite; Turbid current; Sediment density deposit	-
From speculation to model: the challenge of launching new ideas in the earth sciences		Some geological phenomena are explained by geological processes that have never been witnessed. There may also be processes that leave (or have left) no traces at all, or the traces of which have not been recognized as such. Yet, science requires that ideas about such 'secret' processes are communicated with the earth-science community. If such ideas are launched without providing a possible meth…	scientific hypotheses; speculations; models; innovative ideas; Jokulhlaups; Heinrich events	-
Generation and evaluation of multitemporal digital terrain models of the Mt. Everest area from different optical sensors		Multitemporal digital terrain models (DTM) are an important source for many purposes such as the detection of areas, which are susceptible to natural hazards such as landslides and glacial lake outburst floods, or for the examination of changes in glacier thickness. To exploit the potential of stereo satellite and aerial imagery for time series analysis, the employed methodology and software can …	DTM; Change assessment; Khumbu Himalaya; Cartosat-1; Corona	-		1
Genesis and provenance of a new Middle Pleistocene diamicton unit at Happisburgh, NE Norfolk, UK		Glacigenic deposits at Happisburgh, NE Norfolk, record the earliest known expansion of glaciers into lowland eastern England during the Quaternary. The sequence comprises two regionally extensive till units, the Happisburgh Till and Corton Diamicton members of the Happisburgh Glacigenic Formation, deposited during separate ice advances, and intervening glacilacustrine and outwash deposits laid do…		-
Genesis of the 'glacial curvilineation' landscape by meltwater processes under the former scandinavian Ice Sheet, Poland		Dobrzyn Plateau in central Poland contains a suite of enigmatic glacial bedforms termed 'glacial curvilineations' (GCL). These landforms occur within tunnel valleys forming a complex anabranched network. GCL consist of a series of parallel ridges extending for as much as 5 km. Over their length, GCL ridges are parallel to neighboring ridges and to tunnel valley margins. Internal GCL composition c…	Subglacial processes; Ice sheet; Glaciation; Meltwater erosion; Glacial curvilineations	-
Genetic analysis of interior Pacific Northwest Oncorhynchus mykiss reveals apparent ancient hybridization with westslope cutthroat trout		Seventeen populations of Oncorhynchus mykiss were analyzed for mitochondrial haplotype diversity through either polymerase chain reaction-restriction fragment length polymorphism analysis or mitochondrial DNA sequencing. Six new mitochondrial haplotypes were observed among these populations, five in steelhead and one in Harney Basin rainbow trout. Although no distinct patterns were observed betwe…		-									1
Geochemical warning for subglacial eruptions - background and history		Early detection of the runoff from a volcanic event may save lives, property and infrastructure such as road constructions, power plants and power distribution systems. The project described herein aims at designing automatic warning systems based on monitoring chemical changes of glacial rivers draining the Vatnajokull Glacier and the Myrdalsjokull Glacier in iceland. First, background data have…	geochemical warning; subglacial eruption; glacial rivers; conductivity; jokulhlaup; monitoring; detectors; alarm value; volcanic; geothermal	-					1
Geochronology and paleoclimatic implications of the last deglaciation of the Mauna Kea Ice Cap, Hawaii		We present new (3)He surface exposure ages on moraines and bedrock near the summit of Mauna Kea, Hawaii, which refine the age of the Mauna Kea Ice Cap during the Local Last Glacial Maximum (LLGM) and identify a subsequent fluctuation of the ice margin. The 3He ages, when combined with those reported previously, indicate that the local ice-cap margin began to retreat from its LLGM extent at 20.5 +…	palioclimate; glacial; geochronology	-
Geochronology of the late Pleistocene catastrophic Biya debris flow and the Lake Teletskoye formation, Altai Region, Southern Siberia		In the Biya River valley flowing from Lake Teletskoye, geomorphic and sedimentological evidence of a catastrophic debris flow has been found and assigned to glacier retreat after the last glacial maximum. Here, we report the results of lithological analysis of three sedimentary sections along Lake Teletskoye-the Biya River valley system and optically stimulated luminescence dating of key stratigr…	megaflood; outburst flood; debris flow; moraine-dammed lake; OSL dating; valley incision and aggradation; deglaciation	-
Geology and wine 3: Terroirs of the Walla Walla Valley appellation, southeastern Washington State, USA		Terroir of the Walla Walla Valley appellation of Washington St are is influenced by 1) the rain shadow effect and volcanic tephra of the Cascade Mountain Range, 2) soils derived from Quaternary glacial sediments and wind-blown loess overlying Miocene basalt, and 3) a warm, dry climate with abundant sunshine and cool nights due to high latitude (45-48 degreesN) and elevation. Wine flavours of Wall…		-									1
Geology and wine 6. Terroir of the Red Mountain appellation, central Washington State, USA		Red Mountain is the newest of five appellations in Washington State and like the majority of Washington vineyards its terroir is influenced by 1) the rain shadow effect and volcanic tephra of the Cascade Mountain Range, 2) soils derived from Quaternary glacial sediments and wind-blown loess overlying Miocene basalt, and 3) a warm, dry climate with abundant sunshine and cool nights due to high lat…		-									1
Geomorphic and sedimentological signature of a two-phase outburst flood from moraine-dammed Queen Bess Lake, British Columbia, Canada		On 12 August 1997, the lower part of Diadem Glacier in the southern Coast Mountains of British Columbia fell into Queen Bess Lake and produced a train of large waves. The waves overtopped the broad end moraine at the east end of the lake and flooded the valley of the west fork of Nostetuko River. The displacement waves also incised the outflow channel across the moraine. Stratigraphic and sedimen…	moraine-dammed lake; flood; palaeohydrology; Nostetuko River; British Columbia	-									1
Geomorphic effectiveness, sandur development, and the pattern of landscape response during jokulhlaups: Skeioararsandur, southeastern iceland		By contrast with other historical outburst floods on Skeioardrsandur, the 1996 jokulhlaup was unprecedented in its magnitude and duration, attaining a peak discharge of similar to 53,000 m(3),/s in <17 h. Using a combination of field sampling and remote sensing techniques (Landsat TM, SAR interferometry, airphotos, and laser altimetry), we document the sandur-wide geomorphic impacts of this event…	floods; Jokulhlaups; facies models; outwash; sediment	-					1
Geomorphic impact and rapid subsequent recovery from the 1996 Skeioararsandur jokulhlaup, iceland, measured with multi-year airborne lidar		The November 1996 jokulhlaup that burst from the Vatnajokull ice cap onto Skeidararsandur was the highest-magnitude flood ever measured on the largest active glacial outwash plain (sandur). Centimeter-scale elevation transects, measured from repeat-pass airborne laser altimetry missions flown in 1996 (pre-flood), 1997, and 200 1, show that sediment deposition exceeded erosion across the central S…	iceland; Skeioararsandur; Vatnajokull; Jokulhlaup; flood; erosion; lidar; DEM; remote sensing	-					1
GEOMORPHIC IMPLICATIONS OF GLACIER OUTBURST FLOODING - NOEICK RIVER VALLEY, BRITISH-COLUMBIA		An outburst flood from Ape Lake in October 1984 severely affected channel and floodplain morphology of Noeick River. This event, estimated to have exceeded 10(3) m3.s-1, was as much as 2.4 times greater than the probable maximum meteorological flood. Storage of water in ponds, lakes, and floodplain margins resulted in attenuation of the flood peak as it progressed downstream. As a result, flood e…		-
Geomorphic, sedimentary, and potential palaeoenvironmental significance of peat blocks in alluvial river systems		Fluvial erosion of peat deposits occurs in many environmental settings: however, the erosion and transport of large peat blocks by river channels has received relatively little attention. This paper describes the sedimentary significance and potential palaeoenvironmental interpretation of peat blocks in alluvial river systems. Evidence is presented from a number of field studies of upland river s…	Peat; Sediment transport; Deposition; Sedimentation; Palaeoenvironmental significance	-
Geomorphologic impacts of the glacial lake outburst flood from Lake No. 513 (Peru)		This article deals with the 2010 glacial lake outburst flood (GLOF) which happened in the Chucchun Valley in the Cordillrea Blanca (Peru). The volume of the ice and rock fall from Mt. Hualcan was estimated to be about 500,000 m(3) and the detachment zone was identified between 5,450 and 5,600 m a.s.l. Basic landforms and processes (e.g. stream erosion, accumulation) were characterized by field in…	GLOF; Debris flow; Natural hazards; Deglaciation; Cordillrea Blanca; Peru	-										1
Geomorphological evidence for jokulhlaups from Kverkfjoll volcano, iceland		Jokulhlaups (glacial outburst floods) are known to have drained along the Jokulsa a Fjollum river in iceland during the Holocene. However, little is known about their number, age, source, and flow characteristics. This paper provides detailed geomorphological evidence for jokulhlaups that have routed from the Kverkfjoll ice margin and hence into the Jokulsa a Fjollum. Erosional evidence of jokulh…	Kverkfjoll; Jokulhlaups; outburst flood; geomorphology; volcanic rifting zone; iceland	-					1
Geomorphological evidence towards a de-glacial control on volcanism		A number of theoretical, conceptual and numerical models exist for de-glacial controls on volcanism, but geological evidence is scarce. We describe and explain a regional topographic and geomorphic expression of sub-glacial volcanism, namely that at Kverkfjoll, iceland. This area comprises a series of parallel sub-glacially-erupted volcanic edifices, which together give excellent 3D geological ex…	sub-glacial volcanism; volcanic lithofacies; sediment-landform associations; ice-volcano interactions; jokulhlaups; glacial outburst floods; landscape development	-					1
Geomorphological impact and morphodynamic effects on flow conveyance of the 1999 jokulhlaup at solheimajokull, iceland		The 1999 jokulhlaup at Solheimajokull was the first major flood to be routed through the proglacial system in over 600years. This study reconstructed the flood using hydrodynamic, sediment transport and morphodynamic numerical modelling informed by field surveys, aerial photograph and digital elevation model analysis. Total modelled sediment transport was 469 800m(3) (+/- 20%). Maximum erosion of…	glacial outburst flood (GLOF); outburst flood; glacier flood; erosion; deposition; proglacial	-					1
GEOMORPHOLOGY OF THE CENTRAL AND FRONTAL RONGBUCK GLACIER AREA (MT. EVEREST, TIBET)		This report details the results of some recent geomorphological studies, surveys and mappings of the higher parts of the northern (Tibetan) area of Mount Everest, along the Rongbuk glacier. Its retreat is causing extensive gravitational phenomena involving both ice/snow and rock/debris. At the same time, the spatial reduction and the retreat of the glacier tongues are promoting new conditions for…	GIS and glacial; Periglacial and paraglacial mapping; Cryosphere shrinking; Glacial risk; GLOF; Mount Everest; Rongbuk glacier	-
Geophysical surveys of the sediments of Loch Ness, Scotland: implications for the deglaciation of the Moray Firth Ice Stream, British-Irish Ice Sheet		We present results from three geophysical campaigns using high-resolution sub-bottom profiling to image sediments deposited in Loch Ness, Scotland. Sonar profiles show distinct packages of sediment, providing insight into the loch's deglacial history. A recessional moraine complex in the north of the loch indicates initial punctuated retreat. Subsequent retreat was rapid before stabilisation at F…	Loch Ness; geophysical surveys; jokulhlaup; deglaciation; proglacial	-
Geothermal activity in the subglacial Katla caldera, iceland, 1999-2005, studied with radar altimetry		The Katla caldera is located under the Myrdalsjokull ice cap and is one of the most hazardous volcanoes in iceland due to major jokulhlaups that accompany eruptions. Subglacial geothermal activity is manifested in several 10-50 m deep depressions (ice cauldrons) within and at the caldera rim and the total geothermal heat output is of the order of a few hundred megawatts. A short-lived but powerfu…		-					1
Glacial and glacially conditioned lake types in the Cordillrea Blanca, Peru: A spatiotemporal conceptual approach		The article presents a conceptual approach for the spatiotemporal distribution pattern of principal lake types in the context of the glaciation history in the Cordillrea Blanca. The tropical mountain range hosts one of the main concentrations of proglacial lakes in high-mountain settings worldwide, which have formed as a result of the dominant trend of modern glacier retreat. In the 20th century,…	Cordillrea Blanca; glacial lake outbursts; glacial lakes; outburst cascades; paleolakes; paraglacial; Quaternary glaciation	-										1
Glacial debris-flows mitigation in Kazakstan: Assessment, prediction and control		In the last several decades in Kazakstan's territory the most disastrous natural phenomena are glacial debris flows. Their formation are due mainly to catastrophic outbursts of glacial lakes. Based on elaborate classification, the most dangerous objects were discovered and an assessment of the probable magnitudes of outburst floods was carried out. Depending on a glacial lake's origin, a few meth…		-
Glacial extent and catastrophic meltwater events during the deglaciation of Southern iceland		Reconstruction of the paleoenvironment of South iceland based on lithofacies and chronological studies of the Budi morainal complex, lacustrine deposits at Ofaerugil and a sediment core from Lake Hestvatn, South iceland, revealed evidence for repeated catastrophic flood (jokulhlaup) activities during the late Younger Dryas (YD) and the early Preboreal (PB) chronozones. During this time, thin and …		-					1
Glacial hazards in the Rolwaling valley of Nepal and numerical approach to predict potential outburst flood from glacial lake		In recent years, climate change and retreating glaciers constitute a major hazard in the Himalaya of South Asia. Glacial lakes are rapidly developing or increasing due to climate change. The rapid development of the lake may cause outburst of the lake. The outburst discharge from the glacial lake can cause catastrophic flooding and disaster in downstream area. Therefore, it is necessary to invest…	Impact of climate change; Glacial hazard assessment; Rolwaling valley; Numerical approach; Moraine dam failure	-		1
Glacial imprints of the Okanogan Lobe, southern margin of the Cordilleran Ice Sheet		The glacial geomorphology of the Waterville Plateau (ca. 55 km(2)) provides information on the dynamics of the Okanogan Lobe, southern sector of the Cordilleran Ice Sheet in north-central Washington. The Okanogan Lobe had a profound influence on the landscape. It diverted meltwater and floodwater along the ice front contributing to the Channeled Scabland features during the late Wisconsin (Fraser…	Okanogan Lobe; geomorphology; Cordilleran Ice Sheet; ice stream; glacial landsystem	-									1
Glacial lake evolution in the southeastern Tibetan Plateau and the cause of rapid expansion of proglacial lakes linked to glacial-hydrogeomorphic processes		Glacial lakes, as an important component of the cryosphere in the southeastern Tibetan Plateau (SETP) in response to climate change, pose significant threats to the downstream lives and properties of people, engineering construction, and ecological environment via outburst floods, yet we currently have limited knowledge of their distribution, evolution, and the driving mechanism of rapid expansio…	Glacial lake; Tibetan Plateau; Landsat; ICESat; Mountain glacier; Climate change	-
Glacial Lake Expansion in the Central Himalayas by Landsat Images, 1990-2010		Glacial lake outburst flood (GLOF) is a serious hazard in high, mountainous regions. In the Himalayas, catastrophic risks of GLOFs have increased in recent years because most Himalayan glaciers have experienced remarkable downwasting under a warming climate. However, current knowledge about the distribution and recent changes in glacial lakes within the central Himalaya mountain range is still li…		-		1
Glacial lake mapping with very high resolution satellite SAR data		Floods resulting from the outbursts of glacial lakes are among the most far-reaching disasters in high mountain regions. Glacial lakes are typically located in remote areas and space-borne remote sensing data are an important source of information about the occurrence and development of such lakes. Here we show that very high resolution satellite Synthetic Aperture Radar (SAR) data can be employe…		-	1	1		1
Glacial Lake Outburst Flood (GLOF) risk mapping in Hunza River Basin (Pakistan) using geospatial techniques		In Hindu Kush Himalayas (HKH) region, observations on glacial fluctuations indicate substantial retreat of glaciers, especially in Pakistan, Nepal, India and China. Recent global temperature rise has allegedly been responsible for the depletion of these glaciers and consequently creation of lakes on their terminus. Several of these lakes have burst and caused flooding or Glacial Lake Outburst Flo…	galcial lake outburst flood (GLOF); remote sensing; GIS; hydrologic and hydraulic modeling; risk map	-		1
Glacial lake outburst flood at Kedarnath, Indian Himalaya: a study using digital elevation models and satellite images		Kedarnath (3,533 m, 30A degrees 44'05aEuro(3)N, 79A degrees 04'02aEuro(3)E) is situated within a kilometre of the termini of the Chorabari and Companion glaciers in the Indian Himalaya. An outburst flood from a lake (3,845 m) formed by right lateral moraine of the former caused severe damage to the village on 17 June 2013. We determined various physical parameters of the lake from three digital e…	GLOF; DEM; Remote sensing; Chorabari; Kedarnath	-		1
Glacial lake outburst flood hazards in Hindukush, Karakoram and Himalayan Ranges of Pakistan: implications and risk analysis		One of the spectacular effects of recent atmospheric warming in the Himalayan region has been the creation of meltwater lakes on the lower sections of many glaciers. Climate change is likely to exacerbate further some of these natural hazards such as glacial lake outburst floods (GLOFs), which can cause major social and economic damage for large populations living in the Himalayan region. Thirty-…		-		1	1
Glacial lake outburst flood risk assessment of Sun Koshi basin, Nepal		The ongoing retreat of glaciers in the Hindu Kush-Himalaya (HKH) is associated with climate change. While deglaciation can cause a suite of impacts, one of the most visible and tangible impacts is the formation of glacial lakes. Some of these lakes can burst out causing large flash floods with the potential to cause significant damage to property, lives and livelihoods. At the moment, knowledge o…		-		1
Glacial lake outburst flood risk assessment using combined approaches of remote sensing, GIS and dam break modelling		A great number of glacial lakes have appeared in many mountain regions across the world during the last half-century due to receding of glaciers and global warming. In the present study, glacial lake outburst flood (GLOF) risk assessment has been carried out in the Teesta river basin located in the Sikkim state of India. First, the study focuses on accurate mapping of the glaciers and glacial lak…		-		1
Glacial lake outburst flood risk in Himachal Pradesh, India: an integrative and anticipatory approach considering current and future threats		Glacial lake outburst floods (GLOFs) are a serious and potentially increasing threat to livelihoods and infrastructure in most high-mountain regions of the world. Here, we integrate modelling approaches that capture both current and future potential for GLOF triggering, quantification of affected downstream areas, and assessment of the underlying societal vulnerability to such climate-related dis…	GLOF; Climate risk; Hazard; Future lakes; Himalaya	-		1
Glacial Lake Outburst Flood Risk in the Poiqu/Bhote Koshi/Sun Koshi River Basin in the Central Himalayas		The Himalayas have experienced several glacial lake outburst floods (GLOFs), and the risk of GLOFs is now increasing in the context of global warming. Poiqu watershed in the Tibet Autonomous Region, China, also known as the Bhote Koshi and Sun Koshi downstream in Nepal, has been identified as highly prone to GLOFs. This study explored the distribution of and changes in glacial lakes, past GLOFs a…	Poiqu River; Bhote Koshi River; Sun Koshi River; transboundary river; damage; GLOF risk; exposure; early warning system; Nepal; China	-		1
Glacial lake outburst floods in the Nepal Himalaya: A manageable hazard?		Within the past fifteen years, glacial lake outburst floods have become an active topic of discussion within the development community focused on Nepal. Such floods endanger thoUSAnds of people, hundreds of villages, and basic infrastructure such as trails and bridges. The flood risk is also a major impediment to hydroelectric development in several river basins. Unlike most other mountain hazard…	outburst floods; glacial lakes; glaciers; Himalaya; Nepal; hazard mitigation	-		1
Glacial lake outburst floods in the Sagarmatha region - Hazard assessment using GIS and hydrodynamic modeling		Glacial lake outburst floods (GLOFs) are common natural hazards in the Himalaya. These floods, usually of large magnitude, can severely affect fragile mountain ecosystems and their limited economic activities. In this study, GLOF hazard in the Sagarmatha region (national park and buffer zone) was assessed using dam break and hydrodynamic modeling. The available data from the Dig Tsho GLOF of 1985…	mountain hazard; glacial lake outburst flood (GLOF); hydrodynamic modeling; vulnerability; Himalayas; Nepal	-		1
Glacial lake outburst floods in upper Nainchu River basin, Tibet		A large outburst flood from a glacial terminal moraine lake can cause severe damage to downstream communities. This paper presents a study on the outbursts of glacial terminal moraine lakes in the upper Nainchu River basin of Tibet. This study includes an investigation of the number, size, and distribution of glacial terminal moraine lakes: analysis of climatic and geographic factors that contrib…		-
Glacial Lake Vitim, a 3000-km(3) outburst flood from Siberia to the Arctic Ocean		A prominent lake formed when glaciers descending from the Kodar Range blocked the River Vitim in central Transbaikalia, Siberia. Glacial Lake Vitim, evidenced by palaeoshorelines and deltas, covered 23,500 km(2) and held a volume of similar to 3000 km(3). We infer that a large canyon in the area of the postulated ice dam served as a spillway during an outburst flood that drained through the river…	Glacial lake outburst flood (GLOF); Freshwater influx; Transbaikalia; Ice-dammed lake	-
Glacial lakes and glacial lake outburst flood in a Himalayan basin using remote sensing and GIS		Glacial hazards relate to hazards associated with glaciers and glacial lakes in high mountain areas and their impacts downstream. The climatic change/variability in recent decades has made considerable impacts on the glacier life cycle in the Himalayan region. As a result, many big glaciers melted, forming a large number of glacial lakes. Due to an increase in the rate at which ice and snow melte…	GLOF; Glacier; NDSI; Mike 11	-		1
Glacial lakes change and current status in the central Chinese Himalayas from 1990 to 2010		Recent evolutions and current status of glacial lakes in the central Chinese Himalayas were analyzed using Landsat satellite imagery acquired in 1990, 2000, and 2010. The datasets show that there are 604 glacial lakes with a total area of 85.17 km(2) in the central Chinese Himalayas in 2010, in which moraine-dammed lakes are the most represented typology (199 lakes, 54.92 km(2)) in terms of area.…	glacial lake; recent evolution; potentially dangerous glacial lakes; the central Chinese Himalayas	-		1
Glacial lakes in the Indian Himalayas - From an area-wide glacial lake inventory to on-site and modeling based risk assessment of critical glacial lakes		Glacial lake hazards and glacial lake distributions are investigated in many glaciated regions of the world, but comparably little attention has been given to these topics in the Indian Himalayas. In this study we present a first area-wide glacial lake inventory, including a qualitative classification at 251 glacial lakes >0.01 km(2). Lakes were detected in the five states spanning the Indian Him…	Glacial lake inventory; Indian Himalayas; Glacial lake outburst flood (GLOF); Risk assessment; Scenario modeling; BASEMENT	-		1
Glacial lakes of the Hinku and Hongu valleys, Makalu Barun National Park and Buffer Zone, Nepal		In recent decades, many of the larger glaciers in the Himalaya and Andes that have experienced increased melting have become glacial lakes. Some of these lakes present a risk of glacial lake outburst floods that can unleash stored lake water and eroded debris, often causing enormous devastation downstream. Many of these new glacial lakes have formed in the Mt. Everest and Makalu Barun National Pa…	GLOF; Glaciers; Nepal; Hinku valley; Hongu valley; Chamlang North Pokhari	-		1
Glacial outburst flood sediments within Disenchantment Bay, alaska: Implications of recognizing marine jokulhlaup deposits in the stratigraphic record		Glacial outburst floods have been observed or inferred in most glaciated regions of the world. Outburst flooding events along past ice-sheet margins have been discussed as possible causes for changes in ocean circulation while subglacial lake drainage under ice sheets may influence ice-sheet stability. The recognition of these geologically instantaneous events in the marine sediment or rock recor…	outburst flood; jokulhlaup; Hubbard Glacier; alaska; glacimarine; Disenchantment Bay	-							1
Glacial outburst floods and loess sedimentation documented during Oxygen Isotope Stage 4 on the Columbia Plateau, Washington State		Stratigraphy and age control of late Pleistocene loess, associated glacial outburst flood deposits and flood-cut unconformities in the Channeled Scabland, Washington State, United States, indicate a significant Cordilleran ice sheet advance during marine Oxygen Isotope Stage 4. Glacial outburst flood deposits from stage 2 (classic Bretz flood deposits, ca 21 to 13 ka) and related features in the …	Loess; Channeled Scabland; Cordilleran ice sheet; Late Pleistocene; Pacific Northwest	-									1
Glacial, periglacial and glacio-volcanic structures on the Echus Plateau, upper Kasei Valles		An extensive region of low, sinuous ridges occupies the Hesperian plateau above Echus Chasma in the upper Kasei Valles, mars. The ridges have lengths of up to 270 km, heights of 100 m and widths of 10 km. The total volume of the ridge material is 6 x 10(11) m(3). In this paper, volcanic flows, depositional and erosional features are discussed using mars Observer Laser Altimeter (MOLA), THEMIS and…	mars; Geological processes; Volcanism; Glaciation	-
Glacial-lake outburst flood effects on Colonia River morphology, Chilean Patagonia		Rio Colonia, a tributary of the Baker River, drains the Northern Patagonia Icefield, and is experiencing a new cycle of Glacial-Lake Outburst Floods (GLOFs). The sudden draining of c. 200 hm3 from glacier-dammed Cachet 2 Lake, results in a 3-5 fold increase in discharge in Baker River, Chile's largest. Suspended sediment concentration also increases 8-fold and load 10 to 20-fold, totalling almost…		-											1
GLACIAL-LAKE SPILLWAY INCISION AND DEPOSITION OF A COARSE-GRAINED FAN NEAR WATROUS, SASKATCHEWAN		The Watrous spillway was rapidly incised during a short-lived outburst from glacial Lake Elstow. In its outlet area, the bed of Lake Elstow was composed of stagnant ice. The 40 km long spillway is incised across a divide, and terminates in the glacial Last Mountain Lake basin, where a coarse-grained fan, herein named the Little Manitou fan, was deposited. Clast sizes fine systematically from the …		-
Glacier area changes in Northern Eurasia		Glaciers are widely recognized as key indicators of climate change. Recent evidence suggests an acceleration of glacier mass loss in several key mountain regions. Glacier recession implies landscape changes in the glacial zone, the origin of new lakes and activation of natural disaster processes, catastrophic mudflows, ice avalanches, outburst floods, etc. The absence or inadequacy of such inform…	Northern Eurasia; glacier systems; glacier changes; space imagery; glacier inventory	-	1
Glacier ecosystem response to episodic nitrogen enrichment in svalbard, European High Arctic		We describe the climatology, hydrology and biogeochemistry of an extreme nitrogen deposition event that occurred in the highly glacierised environment of the European High Arctic during June 1999. Meteorological analysis, three-dimensional air mass trajectories and a 3D transport model show that blocking high pressures over scandinavia and the rapid advection of western European pollution toward …	Nitrogen enrichment; Arctic ecosystems; Arctic glaciers; Meltwater biogeochemistry	-
Glacier change and glacial lake outburst flood risk in the Bolivian Andes		Glaciers of the Bolivian Andes represent an important water resource for Andean cities and mountain communities, yet relatively little work has assessed changes in their extent over recent decades. In many mountain regions, glacier recession has been accompanied by the development of proglacial lakes, which can pose a glacial lake outburst flood ( GLOF) hazard. However, no studies have assessed t…		-										1
Glacier change in the Poiqu River basin inferred from Landsat data from 1975 to 2010		The Poiqu River basin is a transboundary basin that is highly prone to glacial lake outburst floods. This basin is located in the middle of the Himalayas between China and Nepal. Fieldwork investigating nearby glaciers has indicated that glaciers in this region have ablated quickly in recent decades. A new glacier database for the Poiqu River basin was generated for the phases 1975, 2000, and 201…	Glacier change; Accelerating ablation; Poiqu River Basin; Landsat	-		1
Glacier change in western North america: influences on hydrology, geomorphic hazards and water quality		The glaciers of western Canada and the conterminous United States have dominantly retreated since the end of the Little Ice Age (LIA) in the nineteenth century, although average rates of retreat varied from strong in the first-half of the twentieth century, with glaciers stabilizing or even advancing until 1980, and then resuming consistent recession. This retreat has been accompanied by statisti…	glacier change; climate change; streamflow; water quality; geomorphic hazards	-									1
GLACIER LAKE OUTBURST FLOOD DISASTERS IN CHINA				-
GLACIER LAKES AND OUTBURST FLOODS IN THE Nepal Himalaya				-		1
Glacier outburst floods and outwash plain development: Skeidararsandur, iceland		Outwash plains, such as Skeidararsandur, serve as prototypes for braided river facies and analogs for the mars Pathfinder and Viking 1 landing sites on the margins of the Chryse Basin. Glacier outburst floods (jkulhlaups) have generated some of the largest known terrestrial freshwater flows and recent studies suggest that the stratigraphy of outwash plains (sandur) is dominated by sedimentary seq…		-					1
Glacier outburst floods and outwash plain development: Skeioararsandur, iceland (vol 12, pg 126, 2000)				-					1
GLACIER OUTBURST FLOODS FROM HAZARD LAKE, Yukon TERRITORY, AND THE PROBLEM OF FLOOD MAGNITUDE PREDICTION				-									1
GLACIER PHYSICS OF THE PUGET LOBE, SOUTHWEST CORDILLERAN ICE-SHEET		The Puget lobe, the southwest-most extension of the Cordilleran ice sheet, provides an excellent opportunity to examine the connection between glacier physics and the resulting products of glaciation. The action of water, at and within the sediments of the glacier bed, is particularly significant for the geologic record of this ice sheet. Physical data and inferred mass balance relationships cons…		-
Glacier surging as a control on the development of proglacial, fluvial landforms and deposits, Skei d ararsandur, iceland		Glacier-hydrological processes are one of the main factors controlling proglacial fluvial systems. It has been proposed that where jokulhlaups occur they play a dominant role in the evolution of proglacial outwash plains. However, extraordinary meltwater and sediment discharge associated with glacier surging can also play a crucial role in the proglacial system. The interplay of surge-related and…	glacier surging; proglacial; fluvial sedimentology; push moraines; iceland	-					1
Glacier-dammed lake outburst events of Gornersee, Switzerland		Gornersee, Switzerland, is an ice-marginal lake, which drains almost every year, subglacially, within a few days. We present an analysis of the lake outburst events between 1950 and 2005, as well as results of detailed field investigations related to the lake drainage in 2004 and 2005. The latter include measurements of lake geometry, water pressure in nearby boreholes and glacier surface motion.…		-				1
Glacier-dammed lakes and geological work of glacial superfloods in the Late Pleistocene, Southern Siberia, Altai Mountains		Quaternary glacier-dammed lakes of Southern Siberia produced cataclysmic superfloods-floodstreams at the initial and final glacial stages, when the ice dams were unstable. Consequently, the initial surface was greatly and geologically instantly transformed. Morphologic associations of mountainous Scablands developed, similar to the diluvial complexes of the Channeled Scabland in North america: gi…		-
Glacier-dammed lakes in alaska		Glacier dam lakes are hydrologic features that occur only in cold and wet environments that are conducive to glacial formation. Some of these lakes are created when a glacier encroaches on a tributary drainage and blocks the outlet. Runoff then starts to collect above the encroachment until a breach begins to form in the glacial ice and then the water is suddenly released. These jokulhlaup events…	jokulhlaups; glacier-dammed lakes; glacier lake outbursts; alaska glaciers	-							1
Glacier-related landforms and glacial lakes in Huascaran National Park, Peru		The map of lakes and selected glacier-related landforms in Huascaran National Park was created describing their spatial distribution and selected properties related to their development. This work presents additional information on previous lake inventories that was not available prior to its completion despite the fact that some of the newly collected information is important for glacial lake fl…	moraines; rock glaciers; glacial lakes; Cordillrea Blanca; Huascaran National Park; Peru	-										1
Glaciers				-
Glaciers				-
Glaciers and ice sheets: current status and trends		About 10 % of the land surface on Earth is covered by glacier ice, with an estimated total volume equivalent to about 66 m of potential sea-level rise. Almost the totality (99 %) of this volume is locked in the polar ice sheets, while less than 1 % forms all the other mountain glaciers and ice caps. In the last three decades, the general retreat of the mountain glaciers and the accelerated flow a…	Glaciers; Ice sheets; Mass balance; Sea-level rise; Anthropocene	-				1				1
Glaciers and society: attributions, perceptions, and valuations		As icons of a world set in motion by human action, glaciers are often highlighted as quintessential evidences of global climate change. Although there is a general agreement among scientists that glaciers around the world are receding, much of the discussions on the subject tend to be oriented toward technological methodologies. Yet, as elements of the landscape, glaciers are strongly integrated …		-
Glaciers, glacial lakes and glacial lake outburst floods in the Mount Everest region, Nepal		Recent climate changes have had a significant impact on the high-mountain glacial environment. Rapid melting of glaciers has resulted in the formation and expansion of moraine-dammed lakes, creating a potential danger from glacial lake outburst floods (GLOFs). Most lakes have formed during the second half of the 20th century. Glaciers in the Mount Everest (Sagamartha) region, Nepal, are retreatin…		-		1
Glacier-surface velocities in alpine terrain from optical satellite imagery - Accuracy improvement and quality assessment		The worldwide retreat of mountain glaciers has important consequences for the water, food, and power supply of large and densely populated areas in South and Central Asia. Successful mitigation of the hydrological impacts on societies as well as assessing glacier-related hazards require large-scale monitoring of glacier dynamics. However, detailed glaciological data from the Asian highlands are l…	mountain glaciers; glacier velocity; Himalaya; optical imagery; orthorectification; co-registration; COSI-Corr; ASTER; SRTM-error	-		1
Glacier-volcano interactions deduced by SAR interferometry		Glacier-surface displacements produced by geothermal and volcanic activity beneath Vatnajokull ice cap in iceland are described by field surveys of the surface topography combined with interferograms acquired from repeat-pass synthetic aperture radar images. A simple ice-flow model serves well to confirm the basic interpretation of the observations. The observations cover the period October 1996-…		-					1
Glaciohydraulic supercooling in iceland		We present evidence of glaciohydraulic supercooling under jokulhlaup and ablation-dominated conditions from two temperate icelandic glaciers. Observations show that freezing of sediment-laden meltwater leads to intraglacial debris entrainment during normal and extreme hydrologic regimes. Intraglacial frazil ice propagation under normal ablation-dominated conditions can trap copious volumes of sed…	jokulhlaups; glaciofluvial sedimentation; accretion; hydraulic fracturing; iceland	-					1
Glacio-hydrological aspects of climate change in the Himalayas: mitigation of glacial lake outburst floods in Nepal		Atmospheric warming, rapidly retreating glaciers, large numbers of glacial lakes and their accelerated growth, and increase in extreme precipitation events in recent years provide evidence of climate change impacts in the Hindu Kush-Himalayas (HKH). These have led to a recent increase in disastrous floods, including glacial lake outburst floods (GLOFs) in the region. A number of dangerous glacial…	Bhutan; climate change; extreme events; glacial lake outburst floods (GLOF); glacier retreat; Hindu Kush-Himalayas; hydropower; Nepal; transboundary floods	-		1
Glaciolacustrine history of the Huron-Erie lowland in the southeastern Great Lakes region (USA) revisited		The glaciolacustrine history of the Huron-Erie lowland is reinterpreted using a closed basin model (CBM), based on ground surveys, LiDAR imagery, and digital elevation mapping (DEM). According to the CBM, paleolakes Utica, St. Clair, and Rouge were formed about 13,813 cal yr BP in closed depressions as the level of glacial Lake Elkton dropped below that of bounding morainal swells. The CBM explai…	Outburst flood; Paleogeography; Glacial rebound; Quaternary	-									1
Glaciology: The last stampede of a glacial lake		Lakes dammed by ice will commonly spill in catastrophic outbursts. Lake Agassiz-Ojibway, at the margin of the Laurentide ice sheet, burst 8,470 years ago in a subglacial flood whose marks have been scratched into the seafloor of Hudson Bay.		-									1
Glaciovolcanic hydrothermal environments in iceland and implications for their detection on mars		Volcanism has been a dominant process on mars, along with a pervasive global cryosphere. Therefore, the interaction between these two is considered likely. Terrestrial glaciovolcanism produces distinctive lithologies and alteration terrains, as well as hydrothermal environments that can be inhabited by microorganisms. Here, we provide a framework for identifying evidence of such glaciovolcanic en…	Glaciovolcanism; Hydrothermal; mars; Astrobiology; Mineralogy; Analogue	-					1
GLOF STUDY IN TAWANG RIVER BASIN, ARUNACHAL PRADESH, India		Glacial lake outburst flood (GLOF) is one of the major unexpected hazards in the high mountain regions susceptible to climate change. The Tawang river basin in Arunachal Pradesh is an unexplored region in the Eastern Himalayas, which is impending to produce several upcoming hydro-electric projects (HEP). The main source of the river system is the snow melt in the Eastern Himalayas, which is compo…	Glacial lake outburst flood (GLOF); Landsat-8; HEC-RAS; Hydrodynamic channel routing	-		1
GPR-derived architecture of large-scale icelandic Jokulhlaup deposits, north-east iceland		Jokulhlaups (glacial outburst floods) occur frequently throughout iceland and across most of the glaciated regions of the world. The largest of these jokulhlaups are known to have occurred along the northern margin of the Vatnajokull Icecap and drained down the Jokulsi a Fjollum river during the Holocene. Unfortunately, little is known about the number, frequency, age and flow characteristics of …	Jokulhlaup; outburst floods; iceland; sedimentary architecture; GPR facies; glacial margins	-					1
GPR-derived sedimentary architecture and stratigraphy of outburst flood sedimentation within a bedrock valley system, Hraundalur, iceland		Jokulhlaups and lahars are both types of outburst flood that commonly comprise a glacial meltwater and volcaniclastic sediment mix, and have discharges that are typically several orders of magnitude greater than perennial flows. Both types thus constitute a serious threat to life, property and infrastructure but are too powerful and too short-lived for direct measurements of flow characteristics …		-					1
Grain characteristics of silicic Katla tephra layers indicate a fairly stable eruption environment between 2800 and 8100 years ago		Grain size and shape analyses were performed on silicic to intermediate Katla tephra (SILK) formed 2800-8100 years ago to examine whether the grain characteristics had changed with time, and in such a case, could they reflect changes in the eruption environment and/or changes in chemical composition. No systematic changes with time were observed in the grain shape parameters (elongation, ruggedne…		-					1
Growth and collapse of the distributed subglacial hydrologic system of Kennicott Glacier, alaska, USA, and its effects on basal motion		Nearly 100 days of hourly glacier motion, hydrology and hydrochemistry measurements on Kennicott Glacier, alaska, USA, demonstrate the complicated relationship between water and motion at the glacier bed. Our observations capture the transient glacier response to seasonal and daily melt cycles, and to a jokulhlaup that prompts a sixfold increase in glacier speed. Sliding is promoted whenever the …		-							1
Hazard assessment investigations in connection with the formation of a lake on the tongue of Unterer Grindelwaldgletscher, Bernese Alps, Switzerland		The surface of Unterer Grindelwaldgletscher glacier tongue has subsided by more than 200 m over the last 150 years. The surface lowering is not uniform over the glacier tongue but depends on the thickness of the uneven debris cover, which led to the formation of a depression on the tongue. A lake can form in this basin, which occurred for the first time in 2005. Such a glacier lake can drain rapi…		-				1
Hazard assessment of glacial lake outburst floods from Kyagar glacier, Karakoram mountains, China		Kyagar glacier is located in the Chinese Karakoram mountains. The glacier tongue entirely blocks the riverbed in the upper Shaksgam valley and impounds a glacial lake, which was the source of several violent and disastrous glacial lake outburst floods (GLOFs). A GLOF early warning system was implemented between 2011 and 2013. We present an integrative analysis of the hazard potential of Kyagar la…	glacial lake outburst floods (GLOFs, jokulhlaups); glacier hazards; glacier mass balance; glacier surges; remote sensing	-			1
Hazardous processes and events from glacier and permafrost areas: lessons from the Chilean and Argentinean Andes		Glacier and permafrost hazards such as glacial-lake outburst floods and rock-ice avalanches cause significant socio-economic damages worldwide, and these processes may increase in frequency and magnitude if the atmospheric temperature rises. In the extratropical Andes nearly 200 human deaths were linked to these processes during the twentieth century. We analysed bibliographical sources and satel…	extratropical Andes; glacier and permafrost hazards; lake outbursts; rock-ice avalanches; lahars	-											1
Heinabergsjokull and Skalafellsjokull, iceland: active temperate piedmont lobe and outwash head glacial landsystem		A 1:15,000 scale map of the glacial geomorphology and surficial geology of the Heinabergsjokull and Skalafellsjokull glacier forelands in southeast iceland depicts a landsystem imprint of actively receding temperate glaciers in a mountain terrain with a high glacifluvial sediment yield. The landsystem is characterised by the three diagnostic depositional domains for active temperate glacier syste…	glacial landsystem; outwash head; active temperate glacier	-					1
Heinrich events: Massive late pleistocene detritus layers of the North Atlantic and their global climate imprint		Millennial climate oscillations of the glacial interval are interrupted by extreme events, the so-called Heinrich events of the North Atlantic. Their near-global footprint is a testament to coherent interactions among Earth's atmosphere, oceans, and cryosphere on millennial timescales. Heinrich detritus appears to have been derived from the region around Hudson Strait. It was deposited over appro…	climate; Heinrich layers; Heinrich events; ice-rafted detritus	-
Heterogeneous expansion of end-moraine dammed lakes in the Hindukush-Karakoram-Himalaya ranges of Pakistan during 2001-2013		Global climate change during the twentieth century had a significant impact on the glaciers that resulted in creation of new lakes and expansion of existing ones, and ultimately an increase in the number of glacial lake outburst floods (GLOFs) in the Himalayan region. This study reports variation of the end-moraine dammed lakes in the high altitude Hindukush-Karakoram-Himalaya (HKH) region of Pak…	End-moraine; glacial lakes; GLOF; Karakoram; Himalayan region	-		1	1
High levels of particulate matter in iceland due to direct ash emissions by the Eyjafjallajokull eruption and resuspension of deposited ash		The dangers to people living near a volcano due to lava and pyroclastic flows, and, on glacier-or snow-covered volcanoes, jokulhlaups, are well known. The level of risk to human health due to high concentrations of ash from direct emission and resuspension from the ground is, however, not as well known. The eruption at Eyjafjallajokull, 14 April to 20 May 2010, produced abundant particulate matte…		-					1
High-altitude glacial lake hazard assessment and mitigation: a Himalayan perspective		Glaciers throughout the Himalayas have been receding rapidly over the last few years. In the areas vacated by the ice snouts lakes have formed behind large moraine darns. As with their Andean counterparts, these lakes can pose significant threats to downstream towns, roads and power schemes. For a developing country like Nepal, for example, the prospective loss of economically vital infrastructur…		-		1
High-energy sedimentation, Creag Aoil, Spean Bridge, Scotland: implications for meltwater movement and storage during loch Lomond stadial (Younger Dryas) ice retreat		This paper examines the origin and significance of Loch Lomond Stadial (Younger Dryas) gravel deposits at Creag Aoil, Spean Bridge, Scotland. Sedimentation into ice-dammed lakes in Glen Roy and Glen Spean associated with shorelines at 260 m, 325 m and 350 m is well-documented, yet little is known about later, lower level lakes near Spean Bridge. Excavations on the northern flanks of the Lundy Cha…	ice-dammed lake; subaqueous outwash; jokulhlaups; ice-push structures; Scotland	-
High-Latitude Dust Over the North Atlantic: Inputs from icelandic Proglacial Dust Storms		Mineral aerosols play an important role in the atmosphere-ocean climate system. Research has focused almost exclusively on sources in low-latitude arid regions, but here we show that there are substantial sources in cold, higher latitudes. A 6-year record of measurements made on Heimaey, an island south of iceland, reveals frequent dust events with concentrations exceeding 20 micrograms per cubic…		-					1
HISTORY OF LATE-GLACIAL RUNOFF ALONG THE SOUTHWESTERN MARGIN OF THE LAURENTIDE ICE-SHEET		The routing of runoff from the retreating Laurentide Ice Sheet was controlled by a combination of ice-marginal position and topography; isostatic depression also played an important role in the evolution of the ice-marginal landscape. A major redirection of drainage occurred after ice retreated north of the Missouri Escarpment about 12 ka BP. Runoff that had previously flowed south to the Missour…		-									1
Holocene and latest Pleistocene climate and glacier fluctuations in iceland		Multiproxy climate records from iceland document complex changes in terrestrial climate and glacier fluctuations through the Holocene, revealing some coherent patterns of change as well as significant spatial variability. Most studies on the Last Glacial Maximum and subsequent deglaciation reveal a dynamic iceland Ice Sheet (IIS) that responded abruptly to changes in ocean currents and sea level.…		-					1
Holocene glacier variation chronology of the Smorstabbtindan massif, Jotunheimen, southern norway, and the recognition of century- to millennial-scale European Neoglacial Events		New stratigraphic evidence for the Holocene history of three glaciers in central Jotunheimen, southern norway, is presented and the implications for century- to millennial-scale glacier and climatic variability are considered. Minerogenic layers in seven stream-bank mires, flooded episodically by glaciofluvial meltwater, are dated by 79 new radiocarbon age estimates. A revised chronology for glac…	glacier variations; century- to millennial-scale; climatic variability; glaciofluvial evidence; mires; neoglaciation; European Neoglacial Events; Holocene; norway; Jotunheimen; Alps	-						1
Horbyebreen polythermal glacial landsystem, svalbard		A contoured surficial geology and geomorphology map of the forelands of the Horbyebreen, Svenbreen and Ferdinandbreen valley glaciers in Petuniabukta, svalbard was compiled from an orthophotograph based upon aerial photographs taken in 2009. The map reveals typical polythermal glacial landsystems, comprising ice-cored latero-frontal moraine arcs grading up valley into fluted till surfaces draped …	glacial landsystem; polythermal glacier; geometric ridge network; ice hydrofracturing; svalbard	-
Hubbard Glacier, alaska: 2002 closure and outburst of Russell Fjord and postflood conditions at Gilbert Point		Hubbard Glacier, the largest temperate tidewater glacier in the world, has been advancing since 1895 AD and has now twice dammed 60-km-long Russell Fjord, once in 1986 and more recently in 2002. This paper focuses on the 2002 event, when a strong spring advance pushed shallow submarine proglacial sediments against Gilbert Point, closing off Russell Fjord by late June. As a consequence, upstream i…		-							1
HUDSON BAY-HUDSON STRAIT JOKULHLAUPS AND HEINRICH EVENTS - A HYPOTHESIS		Abrupt temperature changes in the northern North Atlantic occurred frequently throughout the last glaciation as shown by proxy records from Greenland ice-cores, deepsea cores, and norway speleothems. Many of these variations occurred in irregular sawtooth cooling cycles which sometimes ended with the deposition of thick layers of ice-rafted debris (IRD) in the deep ocean that are known as Heinric…		-
Humming glaciers		Mountain glaciers represent one of the largest repositories of fresh water in alpine regions globally. However, little is known about the processes by which water moves through these systems. Analysis of data from a deployment of seismometers located near an ice marginal lake in the Swiss Alps reveals, for the first time, that harmonic tremor occurs within mountain glaciers and that individual ic…		-				1
Hydraulic modeling of glacial dam-break floods on the West Branch of the Susquehanna River, Pennsylvania		This study investigates the potential hydraulic conditions of catastrophic floods in the West Branch of the Susquehanna River (West Branch) during the middle to late Pleistocene period and the influence of these paleofloods on the current river bed form. The current channel bed form is characterized using sonar bathymetry data collection techniques. The paleofloods are hypothesized based on publi…		-
Hydraulics of subglacial outburst floods: new insights from the Spring-Hutter formulation		Using a slightly modified form of the Spring-Hutter equations, glacial outburst floods are simulated from three classic sites, "Hazard Lake", Yukon, Canada, Summit Lake, British Columbia, Canada, and Grimsvotn, iceland, in order to calibrate the hydraulic roughness associated with subglacial conduits. Previous work has suggested that the Manning roughness of the conduits is remarkably high, but t…		-					1				1
Hydrodynamic characteristics of the Tam Pokhari Glacial Lake outburst flood in the Mt. Everest region, Nepal		The Tam Pokhari glacial lake outburst flood (GLOF), which occurred in 1998 in the Mt. Everest region of Nepal, was evaluated using hydrodynamic models to gain it better understanding of the flow behaviour. The flood wave was analysed separately under rigid and erodible boundary conditions. In both cases, the calculated dam-breach hydrograph, which had a peak discharge of about 10000 m(3)/s, was r…	climate change; melting glacier; moraine dam failure; flood attenuation; debris flow; disaster risk management; Tam Pokhari Lake; Himalaya	-		1
Hydrodynamics and geomorphic work of jokulhlaups (glacial outburst floods) from Kverkfjoll volcano, iceland		Jokulhlaups (glacial outburst floods) occur frequently within most glaciated regions of the world and cause rapid landscape change, infrastructure damage, and human disturbance. The largest jokulhlaups known to have occurred during the Holocene within iceland drained from the northern margin of Vatnajokull and along the Jokulsa a Fjollum. Some of these jokulhlaups originated from Kverkfjoll volca…	Kverkfjoll; outburst floods; jokulhlaups; hydraulics; geomorphic work; iceland	-					1
Hydrogeologic processes of large-scale tectonomagmatic complexes in Mongolia-southern Siberia and on mars		Large-scale tectonomagmatic complexes are common on Earth and mars. Many of these complexes are created or at least influenced by mantle processes, including a wide array of plume types ranging from superplumes to mantle plumes. Among the most prominent complexes, the Mongolian plateau on Earth and the Tharsis bulge on mars share remarkable similarities in terms of large domal uplifted areas, gre…	Mongolia; mars; Tharsis; ice; floods; plumes	-
Hydrogeological implications of glacial landscape evolution at Skeioararsandur, SE iceland		Patterns of groundwater recharge and flow in present day and palaeo-glacial environments are governed by both geomorphology and subsurface sedimentology. This paper assesses the hydrogeological implications of glacial landscape evolution and develops a conceptual model of glacial landscape evolution and hydrogeological interaction. The ice-marginal zone of Skeioararsandur, SE iceland was selected…	iceland; groundwater; hydrogeology; glacial landsystems; jokulhlaups; surges	-					1
Hydrochemistry of ice stream beds - evaporitic or microbial effects?		Recently, new data have been acquired on the chemical composition of waters within the glacial till beneath the Kamb Ice Stream (KIS, formerly Ice Stream C) and the Bindschadler Ice Stream (BIS, formerly Ice Stream D), two of the arteries of ice loss from the antarctic Ice Sheet (AIS). We compare this water chemistry with basally stored subglacial waters from Arctic and Alpine glaciers and the on…	ice sheet hydrology; hydrochemistry; biogeochemistry; ice stream beds; pore waters	-
Hydrologic and geomorphic effects of temporary ice-dammed lake formation during jokulhlaups		Glacial outburst floods (jokulhlaups) occur frequently in glaciated environments, and the resultant flooding causes geomorphic change and, in some instances, damage to local infrastructure. During some jokulhlaups, floodwater is stored temporarily in ice-marginal locations. In July 1999, a linearly rising jokulhlaup burst from Solheimajokull, iceland. During this remarkable event, subglacial floo…	jokulhlaup; floodwater routing; ice-dammed lake; glaciolacustrine sediment; iceland	-					1
Hydrologic monitoring of supercooled meltwater from icelandic glaciers		Knowledge of how glaciers entrain sediment is central to understanding processes of glacier movement and products of glacial sediment deposition. Previous work has shown that if the total hydraulic potential of subglacial meltwater increases more rapidly than the resulting mechanical energy can be transformed into sensible heat, then supercooling and ice growth will result. This process causes fr…		-					1
Hydrological characteristics of the drainage system beneath a surging glacier		A rare combination of natural circumstances permits assessment of current theories on water flow beneath glaciers. Outburst floods from the subglacial lake Grimsvotn in iceland took place before, during and after surging of Skeloararjokull, the glacier beneath which the outburst floods drain. The observable drainage patterns associated with these floods show the different nature of the basal wate…		-					1
Hydrological modeling of outflow channels and chaos regions on mars		[1] The martian outflow channels were carved by the eruption of catastrophic floods from groundwater aquifers. This study models the time evolution of a typical outflow channel flood originating within a chaos region. The flood initiates when superlithostatic pore pressures within a confined aquifer lead to the propagation of hydrofractures through the confining cryosphere to the surface. The pea…		-
Challenges of modeling current very large lahars at Nevado del Huila Volcano, Colombia		Nevado del Huila, a glacier-covered volcano in the South of Colombia's Cordillera Central, had not experienced any historical eruptions before 2007. In 2007 and 2008, the volcano erupted with phreatic and phreatomagmatic events which produced lahars with flow volumes of up to about 300 million m(3) causing severe damage to infrastructure and loss of lives. The magnitude of these lahars and the pr…	Lahar; Nevado del Huila Volcano; Hydrograph reconstruction; Model calibration/validation; Lahar modeling; FLO-2D; LAHARZ	-
Changes in glacial lakes and glaciers of post-1986 in the Poiqu River basin, Nyalam, Xizang (Tibet)		Glacial lakes and glaciers are sensitive indicators of recent climate change. In the Poiqu River basin of southern Tibet, 60100 km NW of Mt. Everest, Landsat imagery defines post-1986 changes in the size and distribution of both glacial lakes and glaciers. Total area of glaciers in the 229-km(2) drainage area has decreased by 20%. The number of glacial lakes with areas in excess of 0.020 km(2) ha…	Poiqu river; glacier; glacier lake; change; tendency	-
Changes in Glaciers and Glacial Lakes and the Identification of Dangerous Glacial Lakes in the Pumqu River Basin, Xizang (Tibet)		Latest satellite images have been utilized to update the inventories of glaciers and glacial lakes in the Pumqu river basin, Xizang (Tibet), in the study. Compared to the inventories in 1970s, the areas of glaciers are reduced by 19.05% while the areas of glacial lakes are increased by 26.76%. The magnitudes of glacier retreat rate and glacial lake increase rate during the period of 2001-2013 are…		-
CHANGES IN JOKULHLAUP SIZES IN GRIMSVOTN, VATNAJOKULL, iceland, 1934-91, DEDUCED FROM IN-SITU MEASUREMENTS OF SUBGLACIAL LAKE VOLUME		A record of volumes of jojkulhlaups from the subglacial Grimsvotn lake, Vatnajokull, iceland, has been derived for the period 1934-91. The change in lake volume during jokulhlaups is estimated from the lake area, ice-cover thickness and the drop in lake level. The jakulhlaup volumes have decreased gradually during this period of low volcanic activity and declining geothermal power. The two Jokulh…		-					1
CHANGES IN RONGBUK LAKE AND IMJA LAKE IN THE EVEREST REGION OF Himalaya		The Himalaya holds the world record in terms of range and elevation. It is one of the most extensively glacierized regions in the world except the Polar Regions. The Himalaya is a region sensitive to climate change. Changes in the glacial regime are indicators of global climate changes. Since the second half of the last century, most Himalayan glaciers have melted due to climate change. These cha…	Change Detection; Climate; Geography; Glaciology; Hydrology; Spatial; Temporal	-		1
Changes of glacial lakes and implications in Tian Shan, central Asia, based on remote sensing data from 1990 to 2010		Changes of glacial lakes and implications were assessed for the Tian Shan Mountains from 1990 to 2010, based on Landsat Thematic Mapper/Enhanced Thematic Mapper Plus images. The total area of glacial lakes has expAnded greatly over the last 20 years, at an average rate of 0.69 +/- 0.12 km(2) a(-1) or 0.8 +/- 0.1% a(-1). Eastern Tian Shan contributed nearly half that increase (approximate to 0.34 …	Tian Shan; remote sensing; glacial lake; impacts	-	1
CHANGES OF THE CRYOSPHERE AND RELATED GEOHAZARDS IN THE HIGH-MOUNTAIN AREAS OF TAJIKISTAN AND Austria: A COMPARISON		This paper quantifies recent glacier changes and possible future permafrost retreat in the Austrian Alps and the Pamir and Alai Mountains of Tajikistan (Central Asia), two mountainous areas with striking differences in climate and hypsometry, but also in economy and research history. The aim of the comparative study is to improve the understanding of regional differences as a baseline for further…	Austria; climate change; glaciers; high-mountain geomorphology; permafrost; Tajikistan	-	1			1
Changing glacial lakes and associated outburst floods risks in Nanda Devi Biosphere Reserve, Indian Himalaya		Glacial lakes and associated outburst floods (GLOFs) have increased in the Himalayan region due to climate change during the last century that has led to huge losses to society. Therefore, the present study was undertaken to map glacial lakes, their increasing extent, and associated damage potential in Nanda Devi Biosphere Reserve (NDBR), Indian Himalaya. The glacial lakes were mapped on Landsat …	glacial lakes inventory; glacial lake outburst flood; climate change; Indian Himalaya	-		1
CHANNEL NETWORKS CARVED BY SUBGLACIAL WATER - OBSERVATIONS AND RECONSTRUCTION IN THE EASTERN PUGET LOWLAND OF Washington		Channels of inferred subglacial fluvial origin (''channelways'') are conspicuous across the recently deglaciated eastern Puget Lowland of Washington State. Exploiting the unusually well defined geometry of the former Puget-lobe ice sheet, we have reconstructed the subglacial hydraulic head in this region to better understand the location and orientation of these channels. We used established prin…		-									1
Chaotic dynamics of a glaciohydraulic model		A model subglacial drainage system, coupled to an ice-dammed reservoir that receives a time-varying meltwater input, is described and analysed. In numerical experiments an ice-marginal lake drains through a subglacial channel, producing periodic floods, and fills with meltwater at a rate dependent on air temperature, which varies seasonally with a peak value of T-m. The analysis reveals regions o…	glacier hazards; glacier hydrology; glacier modelling; jokulhlaups (GLOFs); subglacial processes	-
Chasma Boreale, mars: Topographic characterization from mars Orbiter Laser Altimeter data and implications for mechanisms of formation		[1] Chasma Boreale, a large reentrant in the north polar cap of mars, is distinct in scale, detailed topography, and orientation from the spiraling troughs that characterize the majority of the polar cap. We use new, high-resolution mars Orbiter Laser Altimeter (MOLA) data and mars Orbiter Camera (MOC) and Viking images of the chasma region to assess hypotheses of origin of Chasma Boreale. These …	mars; polar caps; Chasma Boreale; jokulhlaup; katabatic winds	-
Chemical weathering of volcanogenic sediments, Skeidararsandur, SE iceland		Our hydrochemical investigations in the Skeioararsandur outwash plain in SE iceland are aimed at an understanding of low-temperature chemical weathering processes in a terrain of reactive volcanogenic sediments. The area forms a seaward-sloping 20-km long proglacial aquifer predominantly composed of sands and gravels resulting from jokulhlaup flood events. Seaward increases in alkalinity and elec…		-					1
Chemostratigraphy of the Ordovician Sarah Formation, North West Saudi Arabia: An integrated approach to reservoir correlation		Late Ordovician pre-glacial and syn-glacial deposits form economically important hydrocarbon reservoirs throughout North Africa and the Arabian Peninsula. Internal subdivision of the unit is difficult due to the short time span of deposition resulting in coarse biostratigraphic control. The arenaceous character of the sediments has also contributed to poor biostratigraphic recovery. The present s…	Chemostratigraphy; Sarah Formation; North West Saudi Arabia; Integration of chemostratigraphy; Sedimentology; Paleoflow and seismic data	-
Chronology and paleoenvironments during the late Weichselian deglaciation of the southwest iceland shelf		Foraminifera, sedimentology, and tephra geochemistry in core 93030-006 LCF from the southwestern iceland shelf were used to reconstruct paleoenvironments between 12.7 and 9.4 C-14 ka BP, Seismic-reflection profiles place the core in glacial-marine and marine sediments within one meter of the underlying glacial till. Foraminifers in the earliest glacial-marine sediments provide a record of ice-dis…		-					1
Ice dams, outburst floods, and glacial incision at the western margin of the Tibetan Plateau: A > 100 k.y. chronology from the Shyok Valley, Karakoram		Some of the largest and most erosive floods on Earth result from the failure of glacial dams. While potentially cataclysmic ice dams are recognized to have repeatedly formed along ice-sheet margins, much less is known about the frequency and longevity of ice dams caused by mountain glaciers, and their impact on landscape evolution. Here we present field observations and results from cosmogenic nu…		-			1
Ice fracturing during jokulhlaups: Implications for englacial floodwater routing and outlet development		Theoretical studies of glacial outburst floods (jokulhlaups) assume that: (i) intraglacial floodwater is transported efficiently in isolated conduits; (ii) intraglacial conduit enlargement operates proportionally to increasing discharge; (iii) floodwater exits glaciers through pre-existing ice-marginal outlets; and (iv) the morphology and positioning of outlets remains fixed during flooding. Dire…	jokulhlaup; flood routing; hydrofracturing; subglacial hydrology; iceland	-					1
Ice, moraine, and landslide dams in mountainous terrain		We review recent work on ice, moraine, and landslide dams in mountainous terrain, thus complementing several comprehensive summaries on glacier dams in intracontinental and Arctic areas of low relief. We discuss the roles of tectonic and climatic forcing on ice-, moraine-, and landslide-dam formation and sudden drainage, and focus on similarities and differences between their geomorphic impacts o…		-
Ice-avalanche scenario elaboration and uncertainty propagation in numerical simulation of rock-/ice-avalanche-induced impact waves at Mount Hualcan and Lake 513, Peru		The interest in numerical simulation of cascading processes involving mass movements and lakes has recently risen strongly, especially as the formation of new lakes in high-mountain areas as a consequence of glacier recession can be observed all over the world. These lakes are often located close to potentially unstable slopes and therewith prone to impacts from mass movements, which may cause th…	Hazard analysis; Rock/ice avalanches; Cascading processes; Multi hazard; Numerical simulation; GLOF	-										1
ICEBERG SCOURS, ICEBERG GRAVITY CRATERS AND CURRENT EROSION MARKS FROM A GIGANTIC PREBOREAL FLOOD IN SOUTHEASTERN norway		At approximately 9200 BP the Romerike area of southeastern norway was flooded as much as c. 35 m by a jokulhlaup from the ice-dammed lake 'Nedre Glamsjo'. The flood formed characteristic erosion patterns in the surface of soft sediments and eroded channels in overflow passes. Icebergs driven by the floodwater scoured the bottom and formed imprints on the flooded surface when they were strAnded as…		-						1
Ice-dammed lake drainage cools and raises surface salinities in a tidewater outlet glacier fjord, west Greenland		The drainage of ice-dammed lakes in the form of outburst floods in Greenland is detected regularly by remote sensing, and these events are expected to occur more frequently in a warmer climate. However, their impact on ice sheet stability and neighboring water bodies is still unknown. In this interdisciplinary study, we investigate lake drainages from the Greenland Ice Sheet into a west Greenland…		-								1
ICE-DAMMED LAKES AND OUTBURST FLOODS, Karakoram Himalaya: HISTORICAL PERSPECTIVES ON EMERGING THREATS		The largest glacier impoundments in the Karakoram Himalaya are by ice dams formed where tributary glaciers block main rivers. These can cause outburst floods that spread destruction far through the mountains and into the lowlands. More than 90 outbursts from impoundments behind such dams have been identified. Of the largest and most destructive, 17 were on the upper Indus River and 10 on the Yark…	Indus River; Yarkand River; glacial hazards; ice dams; outburst flood; Karakoram Himalaya	-		1	1
icelandic glaciers		Some 11% of iceland is covered by glaciers. They contain 3,600 km(3) of water, equivalent to a 35-m-thick ice layer spread evenly over the whole country; if melted, it would raise global sea level by 1 cm. This is iceland's greatest water storage, corresponding to the precipitation of 20 years. Dynamic in nature, these glaciers are responsive to climate fluctuations and effect their environment p…		-					1
icelandic jokulhlaup impacts: Implications for ice-sheet hydrology, sediment transfer and geomorphology		Glaciers and ice sheets erode, entrain, and deposit massive quantities of debris. Fluxes of subglacial meltwater exert a fundamental control on ice dynamics and sediment transport budgets. Within many glacial systems outburst floods jokulhlaups) constitute high magnitude, high frequency fluxes of meltwater relative to normal ablation controlled discharge. This paper presents a synthesis of resear…	Jotulhlaups; ice sheets; subglacial erosion; englacial and subglacial deposition; sediment transfer; proglacial; outwash; iceland	-					1
ICE-MELT COLLAPSE PITS AND ASSOCIATED FEATURES IN THE 1991 LAHAR DEPOSITS OF VOLCAN-HUDSON, Chile - CRITERIA TO DISTINGUISH ERUPTION-INDUCED GLACIER MELT		In subaerial volcaniclastic sequences, structures formed by ice blocks can provide information about a volcano's history of lahar generation by glacier melt. At Volcan Hudson in Chile, catastrophic lahars were initiated by eruption-induced melting of glacier ice in August and October 1991. They transported large ice blocks 50 km down the Rio de los Huemules valley to the sea. Large current cresce…	LAHARS; JOKULHLAUP; GEOHAZARDS; GLACIER MELT; ICE-RAFTING; SUBSIDENCE; RING FRACTURES; CURRENT CRESCENT; KETTLE-HOLE; SANDUR	-											1
Ice-melt rates in liquid-filled cavities during explosive subglacial eruptions		Subglacial eruptions are often associated with rapid penetration of overlying ice and release of large flow rates of water as jokulhlaups. Observations of recent subglacial eruptions indicate rapid syn-eruptive ice melting within liquid-filled subglacial cavities, but quantitative descriptions of possible heat transfer processes need to be developed. Calculations of heat flux from the ice cavity …		-
Ice-sheet sourced juxtaposed turbidite systems in labrador Sea		Ice-sheet sourced Pleistocene turbidite systems of the labrador Sea are different from non-glacially influenced systems in their facies distribution and depositional processes. Two large-scale sediment dispersal systems are juxtaposed, one mud-dominated and associated with the Northwest Atlantic Mid-Ocean Channel (NAMOC), the other sand-dominated and forming a huge submarine braided sandplain. Go…		-									1
Ice-volcano interaction of the 1996 Gjalp subglacial eruption, Vatnajokull, iceland		Volcanic eruptions under glaciers can cause dangerous floods and lahars(1-3) and create hyaloclastite (fragmented glassy rock) mountains(4-8), But processes such as the rate of heat transfer between ice and magma, edifice formation, and the response of the surrounding glacier are poorly understood, because of the lack of data. Here we present observations from the fissure eruption at Vatnajokull …		-					1
Ice-volume changes, bias estimation of mass-balance measurements and changes in subglacial lakes derived by lidar mapping of the surface of icelandic glaciers		icelandic glaciers cover similar to 11000 km(2) in area and store similar to 3600 km(3) of ice. Starting in 2008 during the International Polar Year, accurate digital elevation models (DEMs) of the glaciers are being produced with airborne lidar. More than 90% of the glaciers have been surveyed in this effort, including Vatnajokull, Hofsjokull, Myrdalsjokull, Drangajokull, Eyjafjallajokull and se…		-					1
Ice-water interactions during floods from Graenalon glacier-dammed lake, iceland		This paper explores changing ice-water interactions during jokulhlaups from Graenalon, a 5 x 10(8) m(3) subaerial lake dammed by Skeidararjokull, iceland. Unstable drainage of Graenalon since the early 20th century has resulted in 45 jokulhlaups whose hydrologic character has varied enormously. Geomorphic observations and geophysical measurements from the inlet and outlet zones of the subglacial …		-					1
Identification and characterization of alpine subglacial lakes using interferometric synthetic aperture radar (InSAR): Brady Glacier, alaska, USA		The temporary storage and subsequent release of water at glacial margins can cause severe flooding in downstream areas and substantially impact glacier dynamics. Alpine subglacial lakes may not be identified until they become subaerially exposed or release a jokulhlaup. We use interferometric synthetic aperture radar (InSAR) to identify and characterize three dynamic alpine subglacial lakes of Br…		-							1
Identification of Glacial Lake and the Potentially Dangerous Glacial Lake in the Himalayan Basin		Glaciers have perennially been the source of fresh water for more than 1.3 billion of people in the Indian subcontinent. The climatic change and variability in recent decades has made considerable impacts on the glacier lifecycle in the Himalayan region. Warmer climates of the past have resulted in glacier retreat and the formation of glacial lakes in many mountain ranges. The lakes, located at t…	Glaciers; GLOF; Remote sensing; Glacial lake; Himalaya	-		1
Identification of glacier motion and potentially dangerous glacial lakes in the Mt. Everest region/Nepal using spaceborne imagery		Failures of glacial lake dams can cause outburst floods and represents a serious hazard. The potential danger of outburst floods depends on various factors like the lake's area and volume, glacier change, morphometry of the glacier and its surrounding moraines and valley, and glacier velocity. Remote sensing offers an efficient tool for displacement calculations and risk assessment of the identif…		-		1
IDENTIFICATION OF CHARACTERISTICS FEATURES ASSOCIATED WITH GLACIAL OUTBURST		Identification of characteristics features associated with glacial outburst. The Petite Riviere Pikauba valley was flooded following the failure of the Belceil Dam, and its geomorphological description reveals a number of major modifications. The fluvial corridor, initially covered with thick till, now exhibits various erosion and disposition landforms which are surprisingly similar to those foun…		-									1
Identification of potential glacial lake sites and mapping maximum extent of existing glacier lakes in Drang Drung and Samudra Tapu glaciers, Indian Himalaya		The Himalayan glaciers feed major Asian river systems sustaining the lives of more than 800 million people. Though the rates of retreat of individual glaciers are uncertain, on the whole the Himalayan glaciers have been losing mass at an increasing rate over the past few decades. With the changing climate, glaciers will continue to shrink and the rates of retreat may increase even further. This m…	Bed topography; glacial lakes; ice thickness; remote sensing	-		1
Identification of potentially dangerous glacial lakes in the northern Tien Shan		Like in many other parts of the world, the glaciers in northern Tien Shan are receding, and the permafrost is thawing. Concomitantly, glacial lakes are developing. Historically, outbursts of these glacial lakes have resulted in severe hazards for infrastructures and livelihood. Multi-temporal space imageries are an ideal means to study and monitor glaciers and glacial lakes over large areas. Geom…	Glacial lakes; GLOF; Debris-flow; Remote sensing; Geomatics; GIS; Modelling; Hazard assessment; Tien Shan	-	1
Identification of Younger Dryas outburst flood path from Lake Agassiz to the Arctic Ocean		The melting Laurentide Ice Sheet discharged thoUSAnds of cubic kilometres of freshwater each year into surrounding oceans, at times suppressing the Atlantic meridional overturning circulation and triggering abrupt climate change(1-4). Understanding the physical mechanisms leading to events such as the Younger Dryas cold interval requires identification of the paths and timing of the freshwater di…		-									1
Identifying glacial influences on sedimentation in tectonically-active, mass flow dominated arc basins with reference to the Neoproterozoic Gaskiers glaciation (c. 580 Ma) of the Avalonian-Cadomian Orogenic Belt		Neoproterozoic 'Avalonian-Cadomian' volcanic arc basins once lay peripheral to Gondwana and are now found around the North Atlantic Ocean in New England, Atlantic Canada and northwestern Europe as 'peri-Gondwanan terranes.' Their thick (up to 9 km) marine fills are dominated by turbidites, debrites (diamictites and variably graded conglomerates), slumps and olistostromes recording the dominance o…	Neoproterozoic glaciations; Avalonian-Cadomian Terranes; Diamictites; Snowball Earth; Gaskiers glaciation; Remobilized till	-									1	1
Ichnological evidence of jokulhlaup deposit recolonization from the Touchet Beds, Mabton, WA, USA		The late Wisconsinan Touchet Beds section at Mabton, Washington reveals at least seven stacked jokulhlaup deposits, five showing evidence of post-flood recolonization by vertebrates. Tracemakers are attributed to voles or pocket mice (1-3 cm diameter burrows) and pocket gophers or ground squirrels (3-6 cm diameter burrows). The Mount St. Helens S tephra deposited between flood beds contains the i…	Ichnology; Jokulhlaup; Recolonization; Touchet Beds; Mabton Washington; Natal dispersal; Rodent burrows; Paleosurfaces	-									1
Imaging evidence for Hubbard Glacier advances and retreats since the last glacial maximum in Yakutat and Disenchantment Bays, alaska		High-resolution 2-D multichannel seismic data, collected during the 2012 UTIG-USGS National Earthquake Hazards Reduction Program survey of Disenchantment and Yakutat Bays in southeast alaska, provide insight into their glacial history. These data show evidence of two unconformities, appearing in the form of channels, and are interpreted to be advance pathways for Hubbard Glacier. The youngest obs…	Hubbard Glacier; alaska; Little Ice Age; seismic stratigraphy; seismic reflection; Yakutat Bay; glacial sedimentation	-							1
Impact of a rock avalanche on a moraine-dammed proglacial lake: Laguna Safuna Alta, Cordillrea Blanca, Peru		Moraines that dam proglacial lakes pose an increasing hazard to communities in the Andes and other mountain rangers. The moraines are prone to failure through collapse, overtopping and other mountain ranges. The moraines are prone to failure by lake waters or the effect of displacement waves resulting from ice and rock avalanches. Resulting floods have led to the loss of thoUSAnds of lives in the…	glacial hazard; glacial lake outburst flood; GLOF; moraine-dammed lake; Safuna; Cordillrea Blanca; Peru	-										1
Impact of floods versus routing events on the thermohaline circulation		The last deglaciation was interrupted by three major cooling events, the Younger Dryas, the Preboreal Oscillation and the 8.2-ka cold event. As the Laurentide Ice Sheet retreated, different outlets from Lake Agassiz became available causing the proglacial lake to drain to a new level in a rather short timescale ( flood) and divert continental runoff over hundreds of years ( routing). Here we use …		-									1
Impact of neotectonics on drainage network evolution reconstructed from morphometric indices: case study from NW Indian Himalaya		The Spiti river basin in North West Indian Himalaya (31-33 degrees E; 77-79 degrees S), is tectonically unstable, exhibits a complex topography, landscape relief and varied Quaternary sedimentation. The major geomorphic landforms viz., alluvial terraces, strath terraces, alluvial fans, debris cone, fluvio-lacustrine deposits, scree and talus cone are present throughout the valley. An attempt has …	North-West Himalaya; Spiti valley; rnorphometric analysis; palaeolake deposits; outburst floods	-		1
Impact of the July 1999 jokulhlaup on the proximal river jokulsa a solheimasandi, myrdalsjokull glacier, southern iceland		Few studies have focused on the geomorphic and sedimentary impact of magmatically-generated jokulhlaups released directly into the proglacial zone. This paper characterizes the proglacial geomorphic and sedimentary impact of the 17-18 July 1999 jokulhlaup, Glacier Solheimajokull, iceland. Jokulhlaup outflow from the glacier margin resulted in temporary water storage within former ice-dammed lake …	Jokulsa a Solheimasandi; Myrdalsjokull; iceland; geomorphological impact; ice blocks; temporary storage; outwash fan; proglacial; Katla; boulders	-					1
Importance of aeolian processes in the origin of the north polar chasmata, mars		A detailed examination of the location and orientation of sand dunes and other aeolian features within the north polar chasmata indicates that steep scarps strongly influence the direction and intensity of prevailing winds. These steep scarps are present at the heads and along the margins of the north polar chasmata. Topographic profiles of the arcuate head scarps and equator-facing wall of Chasm…	mars, polar caps; mars, surface; mars, polar geology	-
Imprints of sub-glacial volcanic activity on a glacier surface-SAR study of Katla volcano, iceland		The Katla central volcano, covered by the fourth largest icelandic glacier Myrdalsjokull, is among the most dangerous and active volcanoes in iceland. Due to the ice cover, several indicators of its volcanic activity can only be identified indirectly. We analysed a total of 30 synthetic aperture radar (SAR) images with special focus on identifying circular and linear depressions in the glacier su…	SAR remote sensing; ice-volcano interactions; sub-glacial drainage system; caldera formation; iceland; Myrdalsjokull; Katla	-					1
Improvement of Glacial Lakes Detection under Shadow Environment Using ASTER Data in Himalayas, Nepal		The detection of glacial lake change in the Himalayas, Nepal is extremely significant since the glacial lake change is one of the crucial indicators of global climate change in this area, where is the most sensitive area of the global climate changes. In the Himalayas, some of glacial lakes are covered by the dark mountains' shadow because of their location. Therefore, these lakes can not be dete…	glacial lake; shadow environment; DSGL model; ASTER; remote sensing; Himalayas; Nepal	-		1
Improving adaptive capacity and resilience in Bhutan		Bhutan, a small least developed country in the Himalayan Mountains, faces five current climate change related vulnerabilities: landslides and flooding, deteriorating agricultural production, impoverished forests, worsening health security, and impaired hydroelectricity generation. The country is attempting to adapt to these challenges through two globally sponsored adaptation efforts. One is the …	Bhutan; Adaptive capacity; Climate change adaptation; Resilience	-		1
Incipient granular mass flows at the base of sediment-laden floods, and the roles of flow competence and flow capacity in the deposition of stratified bouldery sands		Extraordinary floods commonly produce thick deposits as a result of the entrainment and transport, often at high concentrations, of large volumes of clastic detritus. This paper describes the sedimentology of a stratified bouldery sand deposit generated by a 20-km(3)-breakout flood from intracaldera Lake Taupo following the 1.8-ka Taupo eruption. The proximal deposit is characterised by a strongl…	flow capacity; flow competence; debris flow; granular mass flow; hyperconcentrated flow; shields criterion	-
Index for hazard of Glacier Lake Outburst flood of Lake Merzbacher by satellite-based monitoring of lake area and ice cover		Previous studies show that the area of a moraine-dammed lake can provide a good indicator of the significance of its outburst. For a glacier-dammed lake however, because its area and depth fluctuates with the melting of its ice dam, it is difficult to predict the outburst of the glacier-dammed lake by using its area alone. A characteristic of the surface of Lake Merzbacher is a large amount of fl…	Index for Glacier Lake Outburst; Lake Merzbacher; floating ice; area extraction; early-warning; remote sensing	-
Influence of glacial retreat on natural hazards of the Palcacocha Lake area, Peru		In this article we describe natural hazards associated with outburst floods of Palcacocha Lake and landslide events on the slopes of its moraine dam, in Cojup Valley, Cordillrea Blanca (Peru). These events occurred in the last 70 years and some of them resulted in disasters, which strongly affected the city of Huaras. Field investigations and reference expression hydrodynamic tests as well as arc…	glacial lake; outburst floods; moraine dam; Cordillrea Blanca; Peru	-										1
Influence of sediment drift accumulation on the passage of gravity-driven sediment flows in the iceland Basin, NE Atlantic		The Maury Channel is a deep-sea sediment transport system located in the iceland Basin and extends from the icelandic plateau southwards towards the Charlie-Gibbs Fracture Zone (CGFZ). This study has utilised multibeam bathymetry and multi-channel seismic reflection survey data along 480 km of its 1200 km pathway. In the northern reach of the channel it is predominantly broad (> 20 km) and shallo…	gardar drift; maury channel; turbidity currents; jokulhlaups; iceland basin	-					1
Influence of surface load variations on eruption likelihood: application to two icelandic subglacial volcanoes, Grimsvotn and Katla		We investigate how surface load variations around volcanoes act on shallow magma chambers. Numerical calculations are carried out in axisymmetric geometry for an elliptical chamber embedded in an elastic medium. Magma compressibility is taken into account. For variable chamber shape, size and depth, we quantify how unloading events induce magmatic pressure change as well as variation of the thres…	Numerical solutions; Mechanics; theory; and modelling; Magma chamber processes; Volcano; climate interactions	-					1
Insights on the events surrounding the final drainage of Lake Ojibway based on James Bay stratigraphic sequences		Deglaciation of the James Bay region was highly dynamic, with the occurrence of ice (Cochrane) readvances into glacial Lake Ojibway around final deglaciation time, which culminated with the drainage of Ojibway waters into Hudson Bay and subsequent incursion of the Tyrrell Sea at similar to 8 ka. Renewed interest on these events comes from the possible link between the drainage of the ice-dammed L…	Glacial lake; Lake Ojibway; Lake Agassiz; 8.2-ka cooling event; Laurentide ice sheet; Cochrane readvances; Deglaciation; Meltwaters; James Bay	-									1
Integrated hydrologic and hydrochemical observations of Hidden Creek Lake jokulhlaups, Kennicott Glacier, alaska		Hidden Creek Lake (HCL), an ice-marginal lake impounded by Kennicott Glacier, Wrangell Mountains, alaska, fills annually to 20 to 30 106 m3 and then drains subglacially within 2 to 3 days. During the 1999 and 2000 jokulhlaups, we carried out a series of planned observations around the lake and in the Kennicott River, which drains the glacier. Approximately 20% of the lake volume was contained wit…	outburst flood; glacier hydrology; water chemistry; glaciers; ice; ice-dammed lakes	-							1
Integrated research on mountain glaciers: Current status, priorities and future prospects		Mountain glaciers are sensitive probes of the local climate, and, thus, they present an opportunity and a challenge to interpret climates of the past and to predict future changes. Furthermore, glaciers can constitute hazards, including: glacier outburst floods; changes in the magnitude and timing of runoff in the mountains and adjacent regions; and, through worldwide loss of glacier ice, a globa…	Glaciation; Glaciers; Mountains; Glaciology; Geochronology; Modeling	-
Inter- and Intra-catchment Variations in Proglacial Geomorphology: An Example from Franz Josef Glacier and Fox Glacier, New Zealand		Proglacial outwash plains, or "sandar," can be recognized to be a part of a geomorphic, sedimentary, and hydrological system. At a global scale, glacial meltwater regimes and hence proglacial fluvial systems are strongly determined by glacier basal water conditions and glacier behavior. At a catchment scale it is necessary to consider that proglacial fluvial sedimentation can have a range of freq…		-
Interbedded Late Quaternary turbidites and contourites in Flemish Pass, off southeast Canada: Their recognition, origin and temporal variation		The recognition of contourite and turbidite deposits in deep-marine sequences can be challenging, as deposits may show similar sedimentary characteristics. In Flemish Pass, a small, 1100 m deep, perched basin along the southeast Canadian continental margin, both types of deposits occur. Late Quaternary sediments include thin sand layers interbedded with hemipelagic muds. The distribution, age, se…	North Atlantic; Southeast Canadian continental margin; Turbidites; Contourites; Ocean circulation; labrador Current; Grain size maps; Heinrich events	-									1
Intraglacial water reservoir detected from a geophysical survey in 2010 and preventive measures to avoid a disaster		In 2009 and 2010, an intraglacial water reservoir of about 65000 m3 has been detected from a geophysical survey using ground penetrating radar measurements, surface nuclear magnetic resonance imaging and boreholes, carried out by 3 labs of Grenoble. It was the first time that an intraglacial water reservoir was detected in an alpine glacier before an outburst flood. The 1892 outburst flood, from …	intraglacial water reservoir; subglacial lake; pumpage; glacier; outburst flood	-
Inversion of a glacier hydrology model		The subglacial hydrologic system exerts strong controls on the dynamics of the overlying ice, yet the parameters that govern the evolution of this system are not widely known or observable. To gain a better understanding of these parameters, we invert a spatially averaged model of subglacial hydrology from observations of ice surface velocity and outlet stream discharge at Kennicott Glacier, Wran…	glacier hydrology; glacier modelling; ice dynamics; jokulhlaups (GLOFs); subglacial processes	-									1
Investigating the stability of subglacial lakes with a full Stokes ice-sheet model		Despite the large amount of subglacial lakes present underneath the East antarctic ice sheet and the melt processes involved, the hydrology beneath the ice sheet is poorly understood. Changes in subglacial potential gradients may lead to subglacial lake outbursts, discharging excess water through a subglacial drainage system underneath the ice sheet. Such processes can eventually lead to an incre…		-
Investigation of Li/Ca variations in aragonitic shells of the ocean quahog Arctica islandica, northeast iceland		Interannual and intra-annual variations in lithium-to-calcium ratio were investigated with high temporal resolution in the aragonitic outer shell layer of juvenile Arctica islandica (Mollusca; Bivalvia) collected alive in 2006 off northeast iceland. Li/Ca-shell ranged between 7.00 and 11.12 mu mol mol(-1) and presented well-marked seasonal cycles with minimum values recorded at the annual growth …	bivalve; lithium; calcification; shell growth rate; weathering; iceland	-					1
Invited lecture: Risk zonation and loss accumulation analysis for floods		Worldwide, flood is the number one cause of losses from natural events. The insurance of the flood risk has attracted more and more attention in recent years, not only in the fields of science and politics but also within the insurance industry itself. Even if the list of great natural disasters is headed by storms and despite the relatively low density of insurance against flooding the large num…	risk zonning; flood loss; insurance on flood risk; river flood	-
Is the East antarctic ice sheet stable?		The Greenland and East and West antarctic ice sheets are assessed as being the source of ice that produced an Eemian sea level 6 m higher than present sea level. The most probable source is total collapse of the West antarctic Ice Sheet accompanied by partial collapse of the adjacent sector of the East antarctic Ice Sheet in direct contact with the West antarctic Ice Sheet. This conclusion is rea…	East antarctic ice sheet; Ice streams; Ice shelves; Rising sea level; Climate change	-								1
Isotopically-depleted late Pleistocene groundwater in Columbia River Basalt aquifers: Evidence for recharge of glacial Lake Missoula floodwaters?		Late Pleistocene outburst flooding of ice-dammed glacial Lake Missoula, and possible discharge from the Cordilleran Ice Sheet (CIS), catastrophically altered the northwestern United States landscape, yet little is known about potential infiltration of flood waters into the subsurface. This study provides compelling evidence for the presence of late Pleistocene CIS-related recharge waters in the C…		-									1
Jokulhlaup (ice-dammed lake outburst flood) impact within a valley-confined sandur subject to backwater conditions, Kangerlussuaq, West Greenland		This paper examines the controls on the morphology and sedimentology of a valley-confined proglacial outwash plain or 'sandur' in West Greenland subject to glacial outburst floods (jokulhlaups). Jokulhlaup flow conditions observed during a recent (1987) flood are linked to sandur sedimentology and morphological despite increasing discharge. Bar units were typically large. Bar front advance of 60 …	Greenland; Jokulhlaup; Sandur; Kangerlussuaq; Backwater; Sedimentology	-								1
Jokulhlaup deposits at Asbyrgi Canyon, northern iceland: Sedimentology and implications for flow type		Most research into the impact of icelandic jokulhlaups has concentrated on large relatively unconfined outwash plains in the south of iceland. By contrast, here is only a limited picture of the magnitude, rheology, geomorphic impact and sedimentology of floods draining to the north from the Vatnajokull Glacier. This paper presents sedimentary evidence of jokulhlaup deposits at the Asbyrgi Canyon.…	jokulhlaup deposits; hyperconcentrated flow; Asbyrgi; northern iceland; Jokulsa a Fjollum; geomorphic impact; subglacial volcanism; boulder-rich sediment units	-					1
Jokulhlaup deposits in proglacial areas		This paper discusses the main causes and characteristics of jokulhlaup ('glacier burst') floods, and explores the extent to which they generate depositional landform and sediment assemblages that are distinct from those of 'normal', braided river outwash ('Type I' outwash). Two main jokulhlaup outwash environments are identified: Type II outwash, produced by sudden drainage of ice-dammed lakes; a…		-
Jokulhlaup initiation by ice-dam flotation: The significance of glacier debris content		Ice-dam flotation is a commonly described mechanism for the initiation of jokulhlaups (catastrophic floods) from ice-damned lakes, but predictions of the critical lake depth required for flotation often differ from the actual lake depth at which flotation occurs. Glacier debris content is identified as an insufficiently recognized variable in ice-dam flotation. It is demonstrated that high debris…	debris; density; flotation; ice-dam; ice-dammed lake; jokulhlaup	-
Jokulhlaup-influenced Topography and Geomorphology at Kverkfjoll, iceland		High magnitude jokulhlaups (glacial outburst floods) are known to have drained along the Jokulsa a Fjollum river from the northern margin of Vatnajokull, iceland during the Holocene. However, little is known of the number, age, source and flow characteristics of these jokulhlaups. Ongoing research therefore seeks to quantitatively analyse jokulhlaups from Kverkfjoll, which is a discrete source of…		-					1
Jokulhlaup-related ice fracture and supraglacial water release during the November 1996 Jokulhlaup, Skeidararjokull, iceland		During the initial stages of the November 1996 jokulhlaup at Skeioararjokull, iceland, floodwaters burst onto the glacier surface via a series of fractures. This supraglacial drainage led to the formation of a number of distinct ice surface depressions, one of which is investigated in detail. The morphology and structural characteristics of this feature are described, as well as the sedimentology…		-					1
'JOKULHLAUPS'				-
Jokulhlaups and sediment transport in Watson River, Kangerlussuaq, West Greenland		For 3 years, during a 4-year observation period (2007-2010), jokulhlaups were observed from a lake at the northern margin of Russells Gletscher. At a gauging station located on a bedrock sill near the outlet of Watson River into Sdr Stromfjord, discharge and sediment transport was monitored during the jokulhlaups. The stage rose up to 5.3 m and a maximum discharge of 1,430 m(3) s(-1) was recorded…	discharge; Greenland; jokulhlaups; Kangerlussuaq; sediment transport	-								1
Jokulhlaups at Tulsequah Glacier, northwestern British Columbia, Canada		Jokulhlaups from lakes dammed by Tulsequah Glacier in northwestern British Columbia have occurred regularly since the early twentieth century. The floods commenced after decades of downwasting and retreat of the glacier from its Holocene maximum position, which it achieved in the nineteenth century. Hydrometric data and other records are used to reconstruct the times and peak discharges of floods…	Jokulhlaup; ice-dammed lake; glacier retreat; flood hazard; climate change; Tulsequah Glacier; British Columbia; Canada	-									1
Jokulhlaups circa Landnam: Mid- to late first millennium AD floods in South iceland and their implications for landscapes of settlement		This paper presents geomorphological and sedimentological evidence for three large-scale floods to the west of the ice-capped volcano Katla around the time of Norse settlement or Landnam (AD 870-930). These glacial outburst floods (jokulhlaups), the most recent prehistoric events in a series of Holocene floods in the Markarfljot valley, are securely dated by tephrochronology and radiocarbon datin…	jokulhlaup; hyperconcentrated flow; Landnam; iceland	-					1
JOKULHLAUPS IN iceland - PREDICTION, CHARACTERISTICS AND SIMULATION				-					1
JOKULHLAUPS IN THE KUNMALIKE RIVER, SOUTHERN Tien-SHAN MOUNTAINS, CHINA				-	1
Jokulhlaups: A reassessment of floodwater flow through glaciers		[ 1] In glaciated catchments, glacier-generated floods (jokulhlaups) put human activity at risk with large, sporadic jokulhlaups accounting for most flood-related fatalities and damage to infrastructure. In studies of jokulhlaup hydrodynamics the view predominates that floodwater travels within a distinct conduit eroded into the underside of a glacier. However, some jokulhlaups produce subglacial…		-					1
Key forms for reconstructing glacier dams, lakes and outburst floods: Historical ice-dammed lakes in the Karambar valley, Hindukush (Pakistan)		Since the mid of the 19(th) century till the beginning of the 20(th) century, the Karambar valley has been notorious for glacier lake outbursts. Six major floods were monitored in the mountain lowlands in Gilgit, but their actual source areas were previously unknown. In the present study, nine prehistorical and historical potential glacier dams at altitudes between 2830 m to 3850 m have been reco…		-		1
Knowledge Sharing for Disaster Risk Reduction: Insights from a Glacier Lake Workshop in the Ladakh Region, Indian Himalayas		Small glacier lakes are distributed in the Ladakh Range in northwestern India. This area has experienced several glacier lake outburst floods (GLOFs) since the 1970s, damaging settlements along streams. To reduce GLOF risk through a knowledge-based approach focused on nonstructural measures, we held a workshop in May 2012 for residents of Domkhar Village in the northwestern part of the Ladakh Ran…	Glacier lake outburst flood; disaster risk reduction; disaster preparedness; indigenous knowledge; local community; Ladakh	-		1
Laboratory experiments of water pressure loads acting on a downstream dam caused by ice avalanches		A worldwide decline of mountain glaciers is occurring due to the impacts from climate warming. The retreat of mountain glaciers often leads to different kinds of geo-hazards. Serious surges triggered by glacier avalanches often pose a potential threat to the stability of dams. In this article, four different types of blocks with a constant density of about 900 kg/m(3) were used to simulate the gl…	Glacier avalanches; Pressure load; Surge wave; Glacial lake; Moraine dam	-
Lake Agassiz outburst age and routing by labrador Current and the 8.2 cal ka cold event		Catastrophic drainage of glacial Lake Agassiz, impounded by the Laurentide Ice Sheet (LIS), into Hudson Bay and Strait is widely thought to have caused the 8.2 cal ka cold event, though the path of its drainage in the North Atlantic is poorly known. Analysis and compilation of 10 sediment cores from 8 sites distributed on the eastern Canadian continental shelf and upper slope south of Hudson Stra…		-									1
Lake outburst and debris flow disaster at Kedarnath, June 2013: hydrometeorological triggering and topographic predisposition		Heavy rainfall in June 2013 triggered flash flooding and landslides throughout the Indian Himalayan state of Uttarakhand, killing more than 6000 people. The vast majority of fatalities and destruction resulted directly from a lake outburst and debris flow disaster originating from above the village of Kedarnath on June 16 and 17. Here, we provide a systematic analysis of the contributing factors …	Glacial lake outburst; Rainfall; Snowmelt; Disaster; Himalaya	-		1
Lake Thulagi/Nepal: rapid landscape evolution in reaction to climatic change		The risk of a glacial lake outburst flood from Lake Thulagi/Nepal has been investigated during two field investigations in 1996 and 2000. The lake, developing in response to a rapid retreat and downwasting of Thulagi Glacier, is dammed by a ridge complex. Geophysical measurements demonstrated that the ridge complex is underlain by a massive ice body. A small outflow from the lake crosscuts the ri…		-		1
Lake Vostok behaves like a 'Captured lake' and may be near to creating an antarctic Jokulhlaup		The most well known sub-glacial lake is probably Grimsvotn under Vatnajokul, iceland, from where jokulhlaups regularly burst forth. It is created by thermal melting under the ice cap. The antarctic Lake Vostok, on the other hand, is considered to be located over a region with normal geothermal heat transfer, where it can exist because the ice is so thick that its base is at the pressure melting p…		-					1
Lakes near the glacier Maliy Azau on the Elbrus (Central Caucasus): dynamics and outbursts		The lake dynamics and the current state of them were analyzed on the basis of interpretation of aerial and satellite images of different years together with results of field surveys. Areas of six lakes existing in different years near the Maliy Azau Glacier had been determined. On August 22, 2011, the maximum area of one of the lakes was equal to 25.5 thoUSAnd m(2). The first outburst was caused …	breakthrough floods; degradation of glaciers; glacial lakes; medial moraines; outburst of lake; satellite images; underground drainage	-
Land cover characteristics in NE iceland with special reference to jokulhlaup geomorphology		Subglacial eruptions in Vatnajokull have accounted for several jokulhlaups (glacial outburst floods) in the Northern Volcanic Zone (NVZ). These events and aeolian processes have had a considerable impact on the landscape evolution of the area. Most of this area is occupied by barren land cover; the northern margin of the barren land cover is advancing northwards, burying vegetation under wind-blo…	jokulhlaups; land degradation; iceland; remote sensing	-					1
Landforms and landscape evolution in the Skardu, Shigar and Braldu Valleys, Central Karakoram		The Central Karakoram, which includes K2 in Pakistan, is one of the most rapidly rising areas on Earth and exhibits complex topography and extreme relief Impressive valley fills and glacial landforms are present throughout the valleys. The dynamics of landscape evolution of the region are currently not well understood. Consequently, the landforms were mapped and assessed in the Skardu, Shigar, an…	Central Karakoram; Glacier erosion; Landscape evolution; Terrestrial cosmogenic nuclide (TCN) exposure dating; Glaciation; Paraglaciation; Outburst flood deposits; Late Quaternary	-			1
Landscape reaction, response, and recovery following the catastrophic 1918 Katla jokulhlaup, southern iceland		One of the largest recorded glacier outburst floods (jokulhlaups) occurred in 1918, generated by the last major subglacial eruption of Katla volcano in southern iceland. Using digitized historical topographic surveys and field observations from the main proglacial outwash plain (Myrdalssandur), we document the reaction of Myrdalssandur to the 1918 event and subsequent response and recovery. Our a…		-					1
Landslides in moraines as triggers of glacial lake outburst floods: example from Palcacocha Lake (Cordillrea Blanca, Peru)		Studies focusing on moraine deposits which slide into glacial lakes are scarce, even though they can trigger impact waves responsible for generating glacial lake outburst floods. We focused on landslides in lateral moraines as possible triggers. Detailed geomorphological, geophysical, and satellite radar interferometric investigations of the Palcacocha Lake moraine (Cordillrea Blanca, Peru) toget…	Landslides; Moraines; Glacial lakes; Slope stability calculation; Glacial lake outburst floods; Impact wave models; Cordillrea Blanca	-										1
Large dead-ice depressions in flat-topped eskers: evidence of a Preboreal jokulhlaup in the Stockholm area, sweden		Sedimentological investigations in Palamalm, one of the few elongated, flat-topped, raised glaciofluvial deposits of the Stockholm area, show that the deposit was formed in a subglacial tunnel environment during the early Preboreal. The study provides evidence for dynamic links between the morphology of a subglacial conduit, the regional subglacial discharge, and the regional ice-sheet dynamics. …	dead ice; esker; Preboreal; subglacial drainage; jokulhlaup; Stockholm	-						1
Large hazardous floods as translatory waves		The theory for non-stationary flow in translatory waves is developed for an inclined plane in a prismatic channel and a funneling channel. The existence of translatory waves traveling over dry land or superimposed on constant flow is established, and the dependance on the initial flow value is discussed. Inherent instabilities of the wave tail are discussed. Data from a CFD simulation of a jokulh…	flow simulation; translatory waves; jokuthlaup; flood hazard	-					1
Large sensitivity to freshwater forcing location in 8.2ka simulations		The 8.2ka event is a key test case for simulating the coupled climate response to changes in the Atlantic Meridional Overturning Circulation (AMOC). Recent advances in quantifying freshwater fluxes at 8.2ka from the proxy record have improved the realism of the forcing magnitude in model simulations, yet this forcing is still generally applied in an unrealistic geographic manner, across most of t…	Atlantic Meridional Overturning Circulation; abrupt climate change; deglaciation; 8; 2 ka event; freshwater forcing; coupled climate model simulation	-									1
Large values of hydraulic roughness in subglacial conduits during conduit enlargement: implications for modeling conduit evolution		Hydraulic roughness accounts for energy dissipated as heat and should exert an important control on rates of subglacial conduit enlargement by melting. Few studies, however, have quantified how subglacial conduit roughness evolves over time or how that evolution affects models of conduit enlargement. To address this knowledge gap, we calculated values for two roughness parameters, the Darcy-Weisb…	glacier hydrology; roughness; friction factor; englacial; subglacial	-
LATE DEVENSIAN MELTWATER MOVEMENT AND STORAGE WITHIN THE OCHIL HILLS, CENTRAL SCOTLAND		This study examines the origin and significance of spectacular bedrock channel forms and sedimentary sequences in the Ochil Hills, central Scotland. Channels and terraces form a discontinuous system extending 4 km from the main Forth valley into central Glen Devon via Glen Quey. It is suggested that as the Ochil Hills emerged above the Late Devensian ice sheet, large amounts of glacial meltwater …		-
Late Holocene development of a norwegian alpine alluvial fan affected by proximal glacier variations, episodic distal undercutting, and colluvial activity		The late-Holocene, especially post-Little Ice Age, evolution of Nystolen alluvial fan. Langedalen, Jostedalsbreen region. southern norway, is investigated using a combination of evidence from surface morphology, recent aerial photography, lichenometric dating, hydrological reconstruction, stratigraphy. and sedimentology. The fan is of predominantly fluvial origin, but it was effectively influence…	Holocene landscape evolution; Alpine alluvial fan; Glacier-fed alluvial fan; distal undercutting; Base-level change; Box-sided gully development; Glacial and glaciofluvial activity; Snow avalanches; Process interaction	-						1
Late Ordovician climbing-dune cross-stratification: a signature of outburst floods in proglacial outwash environments?		Climbing dune-scale cross-statification is described from Late Ordovician paraglacial successions of the Murzuq Basin (SW Libya). This depositional facies is comprised of medium-grained to coarse-grained sandstones that typically involve 0 center dot 3 to 1 m high, 3 to 5 m in wavelength, asymmetrical laminations. Most often stoss-depositional structures have been generated, with preservation of …	Bedforms; fluvioglacial; jokulhlaup; megaripples; meltwater; Murzuq Basin; sediment concentration; suspended load	-
Late Pleistocene aggradation and degradation of the lower Colorado River: Perspectives from the Cottonwood area and other reconnaissance below Boulder Canyon		Where the lower Colorado River traverses the Basin and Range Province below the Grand Canyon, significant late Pleistocene aggradation and subsequent degradation of the river are indicated by luminescence, paleomagnetic, and U-series data and stratigraphy. Aggradational, finely bedded reddish mud, clay, and silt are underlain and overlain by cross-bedded to plane-bedded fine sand and silt. That s…	fluvial geomorphology; Colorado River; late Pleistocene; Chemehuevi aggradation	-
Late pleistocene earthquake-triggered moraine dam failure and outburst of Lake Zurich, Switzerland		Lakes impounded by moraines may be considered hazardous in glaciated areas throughout the world because dams can fail suddenly producing destructive floods with peak discharges far in excess of normal flows. Here we present a comprehensive case study in the Zurich, Switzerland, area that reveals several independent lines of evidences for the occurrence of a Late Pleistocene (similar to 13,760 cal…		-				1
Late Quaternary evolution of Lago Castor (Chile, 45.6 degrees S): Timing of the deglaciation in northern Patagonia and evolution of the southern westerlies during the last 17 kyr		Even though Patagonia is ideally located to study climate of the southern mid-latitudes, many questions on the late Quaternary climate evolution remain unresolved. The timing of maximum glacier extent is still uncertain in vast areas, and the postglacial evolution of the Southern Westerly Wind Belt (SWWB) remains highly debated. Here, we study the sedimentary infill of a glacigenic lake (Lago Cas…	Deglaciation; Patagonia; Westerlies; Seismic reflection; Sediment drift	-											1
Late Quaternary megafloods from Glacial Lake Atna, Southcentral alaska, USA		Geomorphic, stratigraphic, geotechnical, and biogeographic evidence indicate that failure of a Pleistocene ice dam between 15.5 and 26 ka generated a megaflood from Glacial Lake Atna down the Matanuska Valley. While it has long been recognized that Lake Atna occupied >= 9000 km(2) of south-central alaska's Copper River Basin, little attention has focused on the lake's discharge locations and beha…	alaska; Matanuska; Knik; Megaflood; Outburst flood; Lake Atna; Rogen moraines; DeGreer moraines; Pygmy whitefish	-							1
Late quaternary Upper Mississippi River alluvial episodes and their significance to the Lower Mississippi River system		The period in the Upper Mississippi Valley (UMV) from about 25 000 years B.P. until the time of strong human influence on the landscape beginning about 150-200 years ago can be characterized by three distinctly different alluvial episodes. The first episode is dominated by the direct and indirect effects of Late Wisconsin glacial ice in the basin headwaters. This period, which lasted until about …		-									1
Late quaternary vertebrates and the opening of the ice-free corridor, with special reference to the genus bison		The ice-free iorridor opened physically in early deglaciation, after 14 ka BP, but at first was not necessarily passable in an ecological sense. One way to gauge the timing of its 'ecological opening' is to establish a chronology for the arrival of immigrant animal species. The bison have excellent potential because of the abundance of their remains. Late Pleistocene and Early Holocene bison find…		-									1
Late-glacial lakes in the Thompson Basin British Columbia: paleogeography and evolution		During the decay of the Cordilleran lee Sheet 10000-13000 BP, glacial lakes developed within valleys that dissect the Interior Plateau of British Columbia. In this paper, we (1) illustrate a procedure for assessing paleo water planes that has general application, (2) document lake paleogeography and evolution in the Thompson Valley, (3) provide new data on the glacio-isostatic response of the cen…		-									1
LATEGLACIAL MARINE EROSION AND A JOKULHLAUP DEPOSIT IN THE BEAULY FIRTH				-
Lateral and vertical facies relationships of bedforms deposited by aggrading supercritical flows: From cyclic steps to humpback dunes		The preservation of bedforms related to supercritical flows and hydraulic jumps is commonly considered to be rare in the geologic record, although these bedforms are known from a variety of depositional environments. This field-based study presents a detailed analysis of the sedimentary facies and stacking pattern of deposits of cyclic steps, chutes-and-pools, antidunes and humpback dunes from th…	Cyclic steps; Chutes-and-pools; Antidunes; Humpback dunes; Supercritical flows; Hydraulic jumps	-
Latest Pleistocene and Holocene glacial events in the Colonia valley, Northern Patagonia Icefield, southern Chile		The Northern Patagonia Icefield (NPI) is the primary glaciated terrain worldwide at its latitude (46.5-47.5 degrees S), and constraining its glacial history provides unique information for reconstructing Southern Hemisphere paleoclimate. The Colonia Glacier is the largest outlet glacier draining the eastern NPI. Ages were determined using dendrochronology, lichenometry, radiocarbon, cosmogenic Be…	Colonia Glacier; cosmogenic nuclide; glacial lake outburst flood; radiocarbon; Lago Cachet Dos	-											1
Late-stage phases of glacial Lake Ojibway in the central Abitibi region, eastern Canada		The decay of the Laurentide ice sheet southern margin during the last deglaciation led to the development of Lake Ojibway that covered large expanses of northeastern Ontario and northwestern Quebec. The history of Ojibway lake phases is poorly detailed mainly because of the physical configuration of the lake basin and the dominance of fine-grained glaciolacustrine sediments that prevent the forma…	Lake Agassiz-Ojibway; Meltwaters; Last deglaciation; Laurentide ice sheet	-									1
Laurentide subglacial outburst floods: Landform evidence from digital elevation models		Various lines of landform evidence in many parts of Canada are comprehensively explicable as products of subglacial sheetfloods - outburst floods. In the Northwest Territories, northern Saskatchewan, and Alberta, landform associations such as scoured bedrock tracts, cavity-fill drumlins, erosional drumlins, erosional giant flutes - remnant ridges, tunnel channels, channeled Scabland, and hummocky…		-									1
Limits and challenges to compiling and developing a database of glacial lake outburst floods		A unified database of glacial lake outburst floods (GLOFs) has been created for analysis and future natural hazard evaluations. The data from individual case studies fill the database at a primary level, while the regional and global scales are more suitable for evaluating the information. There is enhanced research activity in this topic worldwide due to ongoing environmental changes, and this i…	Glacial lake outburst floods; GLOF; Database; ICL/IPL activities; Natural hazards	-	1	1	1	1	1	1	1	1	1	1	1
Limnology, sedimentology, and hydrology of a jokulhlaup into a meromictic High Arctic lake		A large ice-dammed lake drained catastrophically into Lake Tuborg, Ellesmere Island, beginning on 25 July 2003. Limnological, sedimentological, and hydrological parameters were recorded before, during, and after this event. For several weeks prior to the jokulhlaup, water overtopped the ice-dammed lake and flowed into Lake Tuborg's freshwater basin. A shallow sill separates the freshwater basin f…		-									1
Linking the 8.2 ka event and its freshwater forcing in the labrador Sea		The 8.2 ka event was the last deglacial abrupt climate event. A reduction in the Atlantic meridional overturning circulation (AMOC) attributed to the drainage of glacial Lake Agassiz may have caused the event, but the freshwater signature of Lake Agassiz discharge has yet to be identified in delta O-18 of foraminiferal calcite records from the labrador Sea, calling into question the connection be…		-									1
LITHOFACIES VARIATIONS WITHIN SANDUR DEPOSITS - THE ROLE OF RUNOFF REGIME, FLOW DYNAMICS AND SEDIMENT SUPPLY CHARACTERISTICS		The icelandic sandur plains have for long acted as classic sites for models of braided river behaviour and of associated lithofacies assemblages. However, many of the icelandic sandurs are subject to repeated catastrophic flood events, or jokulhlaups, which are likely to have played a significant role in sandur construction. Established lithofacies models based on the icelandic sandurs have faile…		-					1
Living and dying with glaciers: people's historical vulnerability to avalanches and outburst floods in Peru		Human populations worldwide are vulnerable to natural disasters. Certain conditions-such as geographical location or people's income level-can affect the degree to which natural disasters impact people's homes and livelihoods. This paper suggests that vulnerability to natural disasters increases when local people, scientists, and policymakers do not communicate and trust each other. Additionally,…	glacier retreat; glacier hazards; local people; policy; Cordillrea Blanca; Peru	-										1
Local response of a glacier to annual filling and drainage of an ice-marginal lake		Ice-marginal Hidden Creek Lake, alaska, USA, outbursts annually over the course of 2-3 days. As the lake fills, survey targets on the surface of the 'ice dam' (the glacier adjacent to the lake) move obliquely to the ice margin and rise substantially. As the lake drains, ice motion speeds up, becomes nearly perpendicular to the face of the ice dam, and the ice surface drops. Vertical movement of t…		-							1
Localized uplift of Vatnajokull, iceland: subglacial water accumulation deduced from InSAR and GPS observations		We report on satellite and ground-based observations that link glacier motion with subglacial hydrology beneath Skeioararjokull, an outlet glacier of Vatnajokull, iceland. We have developed a technique that uses interferometric synthetic aperture radar (InSAR) data, from the European Remote-sensing Satellite (ERS-1/-2) tAndem mission (1995-2000), to detect localized anomalies in vertical ice moti…		-					1
Long history of pre-Wisconsin, Ice Age cataclysmic floods: Evidence from southeastern Washington State		Cataclysmic Ice Age floods in the Pacific Northwest began as early as 1.5-2.5 Ma, on the basis of an evaluation of surface exposures and recent borehole studies within southeastern Washington. Field evidence suggests at least two episodes of pre-Wisconsin (i.e., > 130 ka) glacial-outburst flooding. A Middle Pleistocene flood is identified by normal magnetic polarity, calcrete-capped deposits that…		-									1
Long-period seismic events with strikingly regular temporal patterns on Katla volcano's south flank (iceland)		Katla is a threatening volcano in iceland, partly covered by the Myrdalsjokull ice cap. The volcano has a large caldera with several active geothermal areas. A peculiar cluster of long-period seismic events started on Katla's south flank in July 2011, during an unrest episode in the caldera that culminated in a glacier outburst. The seismic events were tightly clustered at shallow depth in the Gv…	Katla volcano; iceland; Long-period earthquakes; Volcanic processes; Glacial processes	-					1
Long-term variability of proglacial groundwater-fed hydrological systems in an area of glacier retreat, Skeioararsandur, iceland		Proglacial groundwater-fed features, such as seeps, substantially impact proglacial geomorphology, hydrology, and ecology. However, there is a paucity of research on the impacts of climate change and glacier retreat on the extent of these important features. This paper aims to investigate the impact of glacier retreat on proglacial groundwater levels and on the extent of groundwater-fed seeps. Re…	glacier retreat; proglacial groundwater; groundwater seeps; iceland; sandur	-					1
Magnetostratigraphic evidence from the Cold Creek bar for onset of ice-age cataclysmic floods in eastern Washington during the Early Pleistocene		This study provides a detailed magnetostratigraphy of sediments composing the Cold Creek cataclysmic flood bar in the Pasco Basin, Washington. Our interpretation suggests onset of Missoula floods or similar events prior to 1.1 myr, later than previously suggested by Bjornstad et al. [Bjornstad, B.N., Fecht, K.R., Pluhar, C.J., 2001. Long history of pre-Wisconsin, Ice Age cataclysmic floods: evide…	paleomagnetism; magnetostratigraphy; susceptibility; hysteresis parameters; Hanford; Pasco Basin; Cold Creek bar; Missoula; Scabland; cataclysmic flood; Jokulhlaup	-									1
Magnitude and frequency in proglacial rivers: a geomorphological and sedimentological perspective		Proglacial fluvial sedimentary systems receive water from a variety of sources and have variable discharges with a range of magnitudes and frequencies. Little attention has been paid to how these various magnitude and frequency regimes interact to produce a distinctive sedimentary record in modem and ancient proglacial environments. This paper reviews the concept of magnitude and frequency in rel…	sandur; jokulhlaup; glaciofluvial; braided river; geomorphology; sedimentology	-					1
MAGNITUDES AND IMPLICATIONS OF PEAK DISCHARGES FROM GLACIAL LAKE Missoula		New field evidence and discharge calculation procedures provide new estimates of maximum late Pleistocene glacial Lake Missoula flood discharges for two important reaches along the flood route. Within the Spokane Valley, near the point of release, the peak discharge probably exceeded 17 +/- 3 million m3.sec-1. Downstream at Wallula Gap, a major point of flow convergence, peak discharge was about …		-									1
Mapping of the Eldgja lava flow on Myrdalssandur with magnetic surveying		The 934-938 AD Eldgja lava flow was formed in the largest flood basalt eruption in iceland during the last 1100 years. Since the eruption, sediments from Katla jokulhlaups have accumulated at Myrdalssandur outwash plain and partly buried the Alftaver lava field, the westernmost branch of the Eldgja lava flow. Using the results from a magnetic survey on MYrdalssandur, the location of the buried ed…		-					1
Mapping the Impacts of iceland's Katla Subglacial Volcano on the Myrdalsjokull Glacier		Jokulhlaup is the icelandic term for a sudden and substantial release of subglacial and/or proglacial water. The subglacial volcano Katla and its associated glacier Myrdalsjokull, near iceland's southern coast, have the potential to cause catastrophic jokulhlaups through geothermally induced melting and volcanic eruptions. The resulting jokulhlaups can cause destruction of property and detriment …	jokulhlaups; geothermal hot spots; Katla; Myrdalsjokull; glacier; volcano; ice cauldron; iceland; jokulhlaups; points chauds geothermique; Katla; Myrdalsjokull; glacier; volcan; cuvettes de glace; IslAnde	-					1
Marine record of surge-induced outburst floods from the Bering Glacier, alaska		The Bering Glacier, alaska, is the largest temperate glacier in the world. It episodically surges with rapid advances of the glacier terminus followed by large outburst floods delivering freshwater and sediment to the adjacent Gulf of alaska. We describe the marine record of the 1993-1995 surge and document a 100 yr history of surges recorded in marine sedimentary deposits seaward of the Bering G…		-							1
martian outflow channels: How did their source aquifers form, and why did they drain so rapidly?		Catastrophic floods generated similar to 3.2 Ga by rapid groundwater evacuation scoured the Solar System's most voluminous channels, the southern circum-Chryse outflow channels. Based on Viking Orbiter data analysis, it was hypothesized that these outflows emanated from a global Hesperian cryosphere-confined aquifer that was infused by south polar meltwater infiltration into the planet's upper cr…		-
Measured rates of sedimentation: What exactly are we estimating, and why?		Data on rates of sedimentation are essential in studies of sedimentation systems. These data are obtained in three main study contexts: (1) the study of sedimentation systems that are active today, (2) the source-to-sink study of sedimentation systems that no longer are active, and (3) the study of the relationship between accumulation rate and measurement timespan. The aim of this paper is to qu…	Sedimentation; Sedimentation rate; Accumulation rate; Modern systems; Source-to-sink; Stratigraphic successions	-
Mega deposits and erosive features related to the glacial lake Nedre Glomsjo outburst flood, southeastern norway		In this paper we present a suite of erosional remnants, mega deposits and subtle bar morphology that we relate to the outburst flood from the glacial lake Nedre Glomsjo at the end of the last Ice Age. By using large datasets of airborne LiDAR data implemented in a geographic information system (GIS), we have mapped flood related features along the Glomma and Vrangselva rivers in southeastern norw…	Outburst flood; LiDAR; Mega deposits; Ice-block obstacle marks	-						1
Megafloods and Clovis cache at Wenatchee, Washington		Immense late Wisconsin floods from glacial Lake Missoula drowned the Wenatchee reach of Washington's Columbia valley by different routes. The earliest debacles, nearly 19,000 cal yr BP, raged 335 m deep down the Columbia and built high Pangborn bar at Wenatchee. As advancing ice blocked the northwest of Columbia valley, several giant floods descended Moses Coulee and backflooded up the Columbia p…	Missoula floods; Clovis; Megafloods; Columbia valley	-									1
Megafloods of Northern Asia		Megaflood' refers to very-large-scale, high-energy catastrophic outbursts of water from natural and artificial reservoirs. For example, such outbursts may be caused by the collapse of a natural dam, or by the rapid introduction into a large waterbody of significant amounts of rocks and/or ice. Megafloods have periodically occurred in Northern Asia during the Pleistocene and probably during the Ho…	northern Asia; lake; river; megaflood; tsunami; jokulhlaup	-
Mechanisms of subglacial cavity filling in Glacier de Tete Rousse, French Alps		The deadliest outburst flood from an englacial cavity occurred on Glacier de Tete Rousse in the Mont Blanc area, French Alps, in 1892. A subglacial reservoir was discovered in the same glacier in 2010 and drained artificially in 2010, 2011 and 2012 to protect the 3000 inhabitants downstream. The mechanism leading to the spontaneous refilling of the cavity following these pumping operations has be…	glacier hazards; glaciological natural hazards; jokulhlaups (GLOFs); subglacial lakes; subglacial processes	-				1
Melt season hydrological characteristics of the Parlung No. 4 Glacier, in Gangrigabu Mountains, south-east Tibetan Plateau		With global warming, hazards relating to glacial melt, such as glacial lake outburst floods, are becoming progressively more serious. However, glacial melt processes and their hydrological consequences are very poorly understood. This study collected glacier discharge data from the terminus of the Parlung No. 4 Glacier throughout the melt season (May-October) during 2008, 2010, 2011 and 2012 to s…	Gangrigabu Mountains; Parlung No.4 Glacier; discharge; diurnal variation; storage and delay characteristics	-
Melting and shrinkage of cryosphere in Tibet and its impact on the ecological environment		Global warming is having a profound impact on global ecological systems, and has inevitably induced changes in the cryosphere, one of the five layers of the earth. Major changes include the shrinking and reduction in the area and volume of both the mountain glaciers and the ice caps covering the North and South poles, and the melting of permafrost and thickening of the active frost layer. Swift c…	Tibet; cryosphere; global warming; ecological environment	-
Meltwater features that suggest Miocene ice-sheet overriding of the Transantarctic Mountains in Victoria Land, antarctica		We illustrate here spectacular meltwater features associated with outburst floods beneath an ice sheet that overrode the Transantarctic Mountains in southern Victoria Land. Because of long-term hyperarid polar climate, these features are part of an ancient landscape preserved for about 14 million years. Some channels are associated with areal scouring of basement rocks extending from sea level to…	antarctica; Victoria Land; geomorphology; meltwater landforms; Scablands; subglacial floods; ice-sheet overriding	-
Mercury (Hg) Transport in a High Arctic River in Northeast Greenland		In a warming climate, mercury (Hg) pathways in the Arctic can be expected to be affected. The Hg transport from the high arctic Zackenberg River Basin was assessed in 2009 in order to describe and estimate the mercury transported from land to the marine environment. A total of 95 water samples were acquired and filtered (0.4 mu m pore size), and Hg concentrations were determined in both the filte…	Mercury; River transport; Marine; Arctic; Greenland	-								1
Mercury exports from a High-Arctic river basin in Northeast Greenland (74 degrees N) largely controlled by glacial lake outburst floods		Riverine mercury (Hg) export dynamics from the Zackenberg River Basin (ZRB) in Northeast Greenland were studied for the period 2009-2013. Dissolved and sediment-bound Hg was measured regularly in the Zackenberg River throughout the periods with running water (June-October) and coupled to water discharge measurements. Also, a few samples of snow, soil, and permafrost were analysed for Hg. Mean con…	Hg; River export; Arctic; Snow; Soil; Permafrost	-								1
Methods for assessing regional glacial lake variation and hazard in the southeastern Tibetan Plateau: a case study from the Boshula mountain range, China		Glaciers on the Tibetan Plateau are undergoing an accelerating retreat under climatic warming, with the immediate result of glacial lake outburst floods (GLOFs) becoming increasingly frequent. Glacial lakes in the southeast of the Tibetan Plateau are densely distributed. Due to the difficulties associated with field investigations of glacial lakes, including remote locations and harsh weather con…	Glacial lake outburst flood; Hazard assessment; Remote sensing; Hydrodynamic modeling	-
Microbial transport, survival, and succession in a sequence of buried sediments		Two chronosequences of unsaturated, buried loess sediments, ranging in age from <10,000 years to >1 million years, were investigated to reconstruct patterns of microbial ecological succession that have occurred since sediment burial. The relative importance of microbial transport and survival to succession was inferred from sediment ages, porewater ages, patterns of abundance (measured by direct …		-									1
Middle Pleistocene (Saalian) lake outburst floods in the Munsterland Embayment (NW Germany): impacts and magnitudes		During the late Saalian Drenthe glaciation ice-damming of the Upper Weser Valley led to the formation of glacial Lake Weser. The lake drained catastrophically into the Munsterland Embayment as the western ice dam failed, releasing up to 110 km(3) of water with a calculated peak discharge of 2.5 x 10(5) m(3)/s to 1.3 x 10(6) m(3)/s. Geographic information systems (GIS) and high-resolution digital …	Glacial Lake Weser; Lake outburst floods; Megafloods; Plunge pools; Streamlined hills; Megaflutes; Saalian; Drenthe glaciation; Hondsrug ice stream; Strait of Dover	-
Minimal extension phases of Unteraarglacier (Swiss Alps) during the Holocene based on C-14 analysis of wood		Tree trunks and wood fragments in minerotrophic fen peat that accumulated as the result of a jokulhlaup in the outwash plain of Unteraarglacier were radiocarbon-dated using conventional beta-counting. Different pretreatment methods were tested on two wood samples to determine the reliability of our dates. We dated the wood compounds after extended acid-alkali-acid treatment, as wall as extraction…		-				1
Missoula FLOOD DYNAMICS AND MAGNITUDES INFERRED FROM SEDIMENTOLOGY OF SLACK-WATER DEPOSITS ON THE COLUMBIA PLATEAU, Washington		Sedimentological study of late Wisconsin, Missoula-flood slack-water sediments deposited along the Columbia and Tucannon Rivers in southern Washington reveals important aspects of flood dynamics. Most flood facies were deposited by energetic flood surges (velocities > 6 m/sec) entering protected areas along the flood tract, or flowing up and then directly out of tributary valleys. True still-wate…		-									1
Modeling a glacial lake outburst flood process chain: the case of Lake Palcacocha and Huaraz, Peru		One of the consequences of recent glacier recession in the Cordillrea Blanca, Peru, is the risk of glacial lake outburst floods (GLOFs) from lakes that have formed at the base of retreating glaciers. GLOFs are often triggered by avalanches falling into glacial lakes, initiating a chain of processes that may culminate in significant inundation and destruction downstream. This paper presents simula…		-										1
Modeling of subglacial hydrological development following rapid supraglacial lake drainage		The rapid drainage of supraglacial lakes injects substantial volumes of water to the bed of the Greenland ice sheet over short timescales. The effect of these water pulses on the development of basal hydrological systems is largely unknown. To address this, we develop a lake drainage model incorporating both (1) a subglacial radial flux element driven by elastic hydraulic jacking and (2) downstre…	Greenland ice sheet; subglacial hydrology; lake drainage; modeling	-								1
MODELING RUNOFF FROM THE INYLCHEK GLACIERS AND FILLING OF ICE-DAMMED LAKE MERZBACHER, CENTRAL Tian SHAN		We developed a spatially distributed conceptual melt and runoff model able to cope with debris covered glacier parts. Subdebris melt was calculated based on empirical equations derived from field observations. The model was applied at the Inylchek glaciers. While runoff from Southern Inylchek flows directly into Inylchek River, runoff from Northern Inylchek is blocked by Southern Inylchek and for…	runoff modeling; debris cover; Tian Shan; Inylchek; Lake Merzbacher	-	1
Modeling suspended solids in a Northern Chilean Patagonia glacier-fed fjord: GLOF scenarios under climate change conditions		Suspended solids play an ecologically important role in glacier-fed fjords, given its dominant effect on their primary production arising from the generation of turbid water plumes by retreating glaciers, which increase light attenuation. Glacial-lake outburst floods, GLOFs, are sudden releases of lake-water impounded by a glacier which may affect either locally or regionally depending on the amo…	Chilean fjords; Climate change; GLOFs; Suspended solids; Baroclinic model	-											1
Modelling a cohesive-frictional debris flow: an experimental, theoretical, and field-based study		The rheology of debris flows is difficult to characterize owing to the varied composition and to the uneven distribution of the components that may range from clay to large boulders, in addition to water. Few studies have addressed debris flow rheology from observational, experimental, and theoretical viewpoints in conjunction. We present a coupled rheological-numerical model to characterize the …	debris flow; GLOF; entrainment; modelling; norway	-						1
Modelling and Understanding Multiple Roles of Sediment Transport in Floods		Outburst floods are characterised by being sudden, short-lived and containing high energy. Such kinds of outburst floods generally comprise an intense advancing water wave which can induce considerable sediment loads. Therefore, it is necessary to incorporate sediment transport effects in flood models, instead of just considering water flow. In this paper, a layer-based morphodynamic model is pre…	Layer-based model; Sediment transport; Fluvial process; flash Floods; GLOF	-
Modelling coupled hydraulics and sediment transport of a high-magnitude flood and associated landscape change		Processes and mechanisms of erosion, transport and deposition within high-magnitude outburst floods such as jokulhlaups and lahars are poorly understood and remain largely unquantified. This study therefore applies a two-dimensional or depth-averaged hydrodynamic model, with fully integrated sediment transport, to reconstruct a Holocene jokulhlaup to have occurred from Kverkfjoll volcano, iceland…		-					1
Modelling channelized surface drainage of supraglacial lakes		Supraglacial lakes can drain to the bed of ice sheets, affecting ice dynamics, or over their surface, relocating surface water. Focusing on surface drainage, we first discuss observations of lake drainage. In particular, for the first time, lakes are observed to drain >70 km across the Nivlisen ice shelf, East antarctica. Inspired by these observations, we develop a model of lake drainage through…	antarctic glaciology; glacier hydrology; glacier modelling; ice-sheet modelling; remote sensing	-
Modelling ice-dammed lake outburst floods in the Altai Mountains (Siberia) with HEC-RAS		The ice-dammed lake outburstfloods (jokulhlaups) in the Altai-Mountains are modelled by HEC-RAS 3.0, a superseded version of the well-known HEC 2. The classical procedure of the application of the model is run with the following input data and assumptions: The repeated jokulhlaups were modelled separately with the surfaces of surveyed giant bar surfaces for palaeostage indicators along the upperm…		-
Modelling North american palaeo-subglacial lakes and their meltwater drainage pathways		This paper presents predictions of palaeo-subglacial lakes and their drainage pathways beneath the North american Ice Sheet during the last glaciation. We utilise data on the current topography and seafloor bathymetry, and elevation models of the ice- and ground-surface topography from data-calibrated glaciological modelling to calculate the hydraulic potential surface at the ice-sheets bed. Give…	subglacial lake; palaeo-subglacial lake; meltwater drainage pathways; Laurentide Ice Sheet; numerical ice-sheet modelling; geomorphology	-
Modelling outburst floods from moraine-dammed glacial lakes		In response to climatic change, the size and number of moraine-clammed supraglacial and proglacial lake systems have increased dramatically in recent decades. Given an appropriate trigger, the natural moraine dams that impound these proglacial lakes are breached, producing catastrophic Glacial Lake Outburst Floods (GLOFs). These floods are highly complex phenomena, with flood characteristics cont…	Glacial lake Outburst Flood (GLOF); Moraine dam; Dam-breach modelling; Hydrodynamic modelling	-
Modelling the coupling of flood discharge with glacier flow during jokulhlaups		We explore a mathematical model that couples together a thermomechanically evolving subglacial channel, distributed cavity drainage, and basal sliding along a subglacial flood path fed by a jokulhlaup lake. It allows water transfer between channel and cavities and a migrating subglacial water divide or 'seal' to form between floods. Notably, it accounts for full coupling between the lake and subg…		-
Modelling water flow under glaciers and ice sheets		Recent observations of dynamic water systems beneath the Greenland and antarctic ice sheets have sparked renewed interest in modelling subglacial drainage. The foundations of today's models were laid decades ago, inspired by measurements from mountain glaciers, discovery of the modern ice streams and the study of landscapes evacuated by former ice sheets. Models have progressed from strict adhere…	cryosphere; subglacial hydrology; basal processes; hydraulics; hydrological models; glacier and ice-sheet dynamics	-								1
Monitoring cryosphere and associated flood hazards in high mountain ranges of Pakistan using remote sensing technique		Knowledge of Himalayan cryosphere seems to be an outstanding requirement for assessment of glacier storage, water balance analysis, planning of water resources and flood hazard monitoring. A stepwise approach through mapping glaciers and glacial lakes using satellite remote sensing data and investigating potential glacial lake outburst flood (GLOF) hazards was adopted for the three Hindukush, Kar…	Cryosphere; Glaciers; Flood hazard; Remote sensing; Karakoram; Himalaya	-		1	1
MONITORING GLACIER OUTBURST FLOODS				-
Monitoring of Bashkara Glacier lakes (Central Caucasus, Russia) and modelling of their potential outburst		Glacier lakes pose threat to downstream settlements and infrastructure. In recent decades the number and area of lakes have been growing at an accelerating rate due to worldwide glacier shrinkage. In the Russian Caucasus this process is understudied. We present results obtained during a 12 similar to year (1999 similar to 2010) continuous field monitoring of the Bashkara proglacial lakes group, w…	Glacier lakes; Outburst flood; Debris flow; Glacier lake change; GLOF modelling; Hazard assessment; Russian Caucasus	-
Monitoring of jokulhlaups and element fluxes in proglacial icelandic rivers using osmotic samplers		The quantification of volatile emissions from volcanoes is an integral part of understanding magmatic systems, with the exsolution and extent of volcanic degassing having a large impact on the nature of an eruption. Measurements of volatiles have traditionally focused on gas emissions into the atmosphere, but volatiles can also become dissolved in proximal water bodies en route to the surface. Th…	Osmotic sampler; Jokulhlaups; Subglacial volcanoes; River monitoring; Element fluxes; Futurevolc	-					1
Monitoring of moraine-dammed lakes: a remote sensing-based study in the Western Himalaya		Monitoring of lakes in glaciated terrain in the Himalayan region has been recognized as one of the priority areas especially after the Kedarnath disaster. Among all types of glacial lakes, moraine dammed lakes (MDLs) are the most important from disaster point of view. Remote sensing plays a significant role in view of availability of unbiased repeated data on the expansion or contraction of MDLs …	Glacier; moraine dammed lake; peak discharge; retreat	-		1
Monitoring water accumulation in a glacier using magnetic resonance imaging		Tete Rousse is a small polythermal glacier located in the Mont Blanc area (French Alps) at an altitude of 3100 to 3300 m. In 1892, an outburst flood from this glacier released about 200 000m(3) of water mixed with ice, causing much damage. A new accumulation of melt water in the glacier was not excluded. The uncertainty related to such glacier conditions initiated an extensive geophysical study f…		-				1
Moraine-dammed glacial lake changes during the recent 40 years in the Poiqu River Basin, Himalayas		Glacier retreat is not only a symbol of temperature and precipitation change, but a dominating factor of glacial lake changes in alpine regions, which are of wide concern for high risk of potential outburst floods. Of all types of glacial lakes, moraine-dammed lakes may be the most dangerous to local residents in mountain regions. Thus, we monitored the dynamics of 12 moraine-dammed glacial lakes…	moraine-dammed glacial lake; Poiqu River Basin; remote sensing; empirical equations; slope gradient	-		1
Moraine-dammed lake distribution and outburst flood risk in the Chinese Himalaya		To better understand the risk of disasters due to glacial lake outburst floods (GLOFs), we synthetically analyze the spatial distribution and evolution of moraine-dammed lakes and potentially dangerous glacial lakes (PDGLs) in the Chinese Himalaya. Our county-based assessment of GLOF disaster risk combines PDGL outburst hazard, regional exposure, vulnerability of exposed elements and adaptation c…	applied glaciology; glacier hazards; glaciological natural hazards; subglacial lakes	-		1
Moraine-dammed lake failures in Patagonia and assessment of outburst susceptibility in the Baker Basin		Glacier retreat since the Little Ice Age has resulted in the development or expansion of hundreds of glacial lakes in Patagonia. Some of these lakes have produced large (>= 10(6) m(3)) Glacial Lake Outburst Floods (GLOFs) damaging inhabited areas. GLOF hazard studies in Patagonia have been mainly based on the analysis of short-term series (<= 50 years) of flood data and until now no attempt has b…		-											1
MORAINE-DAMMED LAKES STUDY IN THE CHENAB AND THE SATLUJ RIVER BASINS USING IRS DATA		Moraine-dammed lakes are normally formed near glacier terminus. These lakes can burst due to excessive melting and can cause floods in the valleys. Many such floods have been reported in the Himalayas and other parts of the World. In this paper, an inventory of these lakes in the Satluj and the Chenab basins has been reported. During the investigation, 22 lakes in the Satluj and 31 lakes in the C…		-		1
Morphological analysis and evolution of buried tunnel valleys in northeast Alberta, Canada		Tunnel valleys are large elongated depressions eroded into unconsolidated sediments and bedrock. Tunnel valleys are believed to have been efficient drainage pathways for large volumes of subglacial meltwater, and reflect the interplay between groundwater flow and variations in the hydraulic conductivity of the substrate, and basal meltwater production and associated water pressure variations at t…	Tunnel valleys; Subglacial drainage; Sedimentary architecture	-									1
Morphological properties of tunnel valleys of the southern sector of the Laurentide Ice Sheet and implications for their formation		Tunnel valleys have been widely reported on the bed of former ice sheets and are considered an important expression of subglacial meltwater drainage. Although known to have been cut by erosive meltwater flow, the water source and development of channels has been widely debated; ranging between outburst flood events through to gradually occurring channel propagation. We have mapped and analysed th…		-
Morphology and sedimentology of a giant supraglacial, ice-walled, jokulhlaup channel, Skei d ararjokull, iceland: implications for esker genesis		This paper examines the sedimentary infill of a spectacular, 500-m-long, 100-m-wide ice-walled supraglacial channel, excavated into the snout of Skeioararjokull, iceland during the November 1996 jokulhlaup, The ice-walled channel developed in an area of the glacier, which was extensively fractured during the jokulhlaup. Sculpting of the ice-walled channel into the active snout of Skeioararjokull …	jokulhlaup; supraglacial; iceland; ice-walled channel; sedimentology	-					1
Morphology, sedimentology and palaeohydraulic significance of large gravel dunes, Altai Mountains, Siberia		Coarse-gravel bedforms which resulted from Pleistocene glacial outburst floods are identified as subaqueous dunes. Comparison of the morphology of these 'fossil' structures with modern dunes shows that the form of two-dimensional (2-D) transverse dunes and 3-D cuspate and lunate dunes developed in coarse gravels is comparable with sand-dune morphology within lesser-scale geophysical flows. The si…		-
Motion of an antarctic glacier by repeated tidally modulated earthquakes		Between debris-laden glacial ice and bedrock, basal seismicity can develop that yields information about bed properties(1,2), stress distribution(3), outburst flooding(4), and crevassing and calving(5-7). Basal seismicity in response to glacial motion is linked to variations in both stress and lubrication of bedrock by water and till(8,9). Here we analyse data from the Transantarctic Mountains Se…		-
Multi-decadal mass loss of glaciers in the Everest area (Nepal Himalaya) derived from stereo imagery		Mass loss of Himalayan glaciers has wide-ranging consequences such as changing runoff distribution, sea level rise and an increasing risk of glacial lake outburst floods (GLOFs). The assessment of the regional and global impact of glacier changes in the Himalaya is, however, hampered by a lack of mass balance data for most of the range. Multi-temporal digital terrain models (DTMs) allow glacier m…		-		1
Multidisciplinary constraints of hydrothermal explosions based on the 2013 Gengissig lake events, Kverkfjoll volcano, iceland		Hydrothermal explosions frequently occur in geothermal areas showing various mechanisms and energies of explosivity. Their deposits, though generally hardly recognised or badly preserved, provide important insights to quantify the dynamics and energy of these poorly understood explosive events. Furthermore the host rock lithology of the geothermal system adds a control on the efficiency in the en…	hydrothermal explosions; lake drainage; multidisciplinary; deposits volume; energy partitioning	-					1
Multiple early Holocene climate oscillations at Silver Lake, New Jersey and their possible linkage with outburst floods		Episodic discharges from the Laurentide Ice Sheet are considered to be one of the major causes of climate oscillations during the glacial to interglacial transition. These outburst floods disrupted thermohaline circulation and might have caused cooling events in the North Atlantic region and beyond, including the Younger Dryas, Preboreal Oscillation, and 8.2-ka events. However, few terrestrial se…	Oxygen stable isotopes; Early Holocene; Lake level fluctuation; Proglacial Lake Agassiz; Outburst floods; Climate change	-									1
Multiple effects of sediment transport and geomorphic processes within flood events: Modelling and understanding		Flood events can induce considerable sediment transport which in turn influences flow dynamics. This study investigates the multiple effects of sediment transport in floods through modelling a series of hydraulic scenarios, including small-scale experimental cases and a full-scale glacial outburst flood. A non-uniform, layer-based morphodynamic model is presented which is composed of a combinatio…	Sediment transport; Morphodynamic model; Dam-break; Outburst flood	-
Multi-proxy records of environmental changes in Hudson Bay and Strait since the final outburst flood of Lake Agassiz-Ojibway		In this study postglacial continuous high-resolution data from five marine sediment cores from Hudson Bay and Hudson Strait are presented. Up to now studies in this area focused on the distinction between large scale climatic variations like the glacial-postglacial transition or most recent processes. However, as demonstrated in this study, using sedimentological, geochemical and geophysical para…	postglacial sedimentation; marine sediment cores; paleoenvironmental reconstruction; Hudson Bay; Hudson Strait	-									1
Natural hazards versus climate change and their potential impacts in the dry, northern Himalayas: focus on the upper Kali Gandaki (Mustang District, Nepal)		In the Himalayas, the consequences of climate change are a fairly debated issue, mainly questioning the availability of water resources to the lowland population. North of the monsoon Himalayas, a semi-arid, continental climate prevails and settlements rely economically mostly on irrigated crops, high altitude rangelands, trade and tourism. The upper Kali Gandaki (Mustang) is situated in this are…	Himalayas of Nepal; Arid uplands; Climate change; Natural hazards; Mustang District	-		1
New insights into the subglacial and periglacial hydrology of Vatnajokull, iceland, from a distributed physical model		We apply a time-dependent distributed glaciohydraulic model to Vatnajokull ice cap, iceland, aiming to determine the large-scale subglacial drainage structure, the importance of basally derived meltwater, the influence of a permeable glacier bed and Vatnajokull's discharge contribution to major rivers in iceland. The model comprises two coupled layers that represent the subglacial horizon perched…		-					1
New lakes in deglaciating high-mountain regions - opportunities and risks		In connection with the ongoing disappearance of glaciers in cold mountains, a great number of new lakes come into existence. The sites and approximate formation time of such potential new lakes can be realistically modelled. This provides an important knowledge base for planning the management of at least the larger ones among such lakes. New water bodies can markedly increase the hazard and risk…		-		1		1						1
New method for assessing the susceptibility of glacial lakes to outburst floods in the Cordillrea Blanca, Peru		This paper presents a new and easily repeatable method for assessing the susceptibility of glacial lakes to outburst floods (GLOFs) within the Peruvian region of the Cordillrea Blanca. The presented method was designed to: (a) be repeatable (from the point of view of the demands on input data), (b) be reproducible (to provide an instructive guide for different assessors), (c) provide multiple res…		-										1
New observations on present and prehistorical glacier-dammed lakes in the Shimshal valley (Karakoram Mountains)		In the upper Shimshal valley three glacier dams are present along a horizontal distance of only 25 km: the Khurdopin/Yukshin Gardan, Yazghil and Malungutti glaciers. Only a few decameters separate the glacier tongues from the opposite valley flanks. At some localities the drainage of the main river already takes place subglacially. About 20 glacial floods occurred in the last century in the Shims…	ice-dammed lakes; glacier lake outbursts; palaeoflood indicators	-			1
New results of OSL dating of Quaternary sediments in the Upper Katun' valley (Gorny Altai) and adjacent area		Several sections have been studied to understand the distribution and interrelation of basic genetic types of Quaternary deposits in the Uimon basin and adjacent area. The OSL date of 101 +/- 10 ka from the glaciolacustrine terrace on the northeastern rim of the basin corresponds to the cool substage of MIS 5. The glaciolacustrine sediments of the northern rim are covered with widespread diamicti…	Quaternary sediments; OSL dating; alluvial and lacustrine deposits; glacial megafloods; Gorny Altai	-
New stratigraphic markers in the late Pleistocene Palouse loess: novel fossil gastropods, absolute age constraints and non-aeolian facies		Four stratigraphic sections in the southern part of the Columbia Basin preserve a sequence of aeolian and non-aeolian sediments ranging in age from 9 center dot 43 to > 47 center dot 0 14C ka based on accelerator mass spectrometry radiocarbon dating of fossil molluscs, geochemistry of Cascade Mountain-sourced tephra and association with formally recognized pedostratigraphic units (the Washtucna a…	Loess; Missoula Floods; mollusc; Mount Saint Helens; Pleistocene; soils	-									1
Non-eruptive ice melt driven by internal heat at glaciated stratovolcanoes		Mudflows, floods and lahars from rapid snow and ice melting present potentially devastating hazards to populations surrounding glacial stratovolcanoes. Most ice-melt induced lahars have resulted from eruptive processes. However, there is evidence for non-eruptive hydrothermal volcanic unrest generating rapid and hazardous glacial melt. Here, we use TOUGH2 numerical fluid flow simulations to explo…	Volcanic unrest; Glacial volcano; Hydrothermal; Lahar	-										1
North Atlantic deep-sea sedimentation of Late Quaternary tephra from the iceland hotspot		Piston cores recovered from the North Atlantic were used to study the sedimentation of Holocene and Pleistocene volcanic ash in the Irminger and iceland Basins. Ash Zones 1 (approximate to 11,100 yr B.P.), 2 (approximate to 55,000 yr B.P.) and 3 (approximate to 305,000 yr B.P.) were identified from their major element glass composition. The silicic and alkalic Ash Zones 1 and 2 originate from the…		-					1
NRT Monitoring of the Eyjafjallajokull volcanic eruption (iceland) with TerraSAR X		NRT Monitoring of the Eyjafjallajokull volcanic eruption (iceland) with TerraSAR X Natural disaster monitoring in iceland based on remote sensing data is performed by the group of geological remote sensing at the University of Munich for the space agencies ESA NASDA/JAXA and CSA since 1992 This will be an important contribution by remote sensing techniques for the early warning and monitoring of …	TerraSAR-X; Vulkanismus; NRT-Monitoring; Gletscherlauf; Island	-					1
Number and size of last-glacial Missoula floods in the Columbia River valley between the Pasco Basin, Washington, and Portland, Oregon		Field evidence and radiocarbon age dating, combined with hydraulic flow modeling, provide new information on the magnitude, frequency, and chronology of late Pleistocene Missoula floods in the Columbia River valley between the Pasco Basin, Washington, and Portland, Oregon. More than 25 floods had discharges of >1.0 X 10(6) m(3)/s. At least 15 floods had discharges of >3.0 X 10(6) m(3)/s. At least…	quaternary; Columbia Basin; Missoula floods; fluvial features; radiocarbon dating	-									1
Numerical analysis of rapid water transfer beneath antarctica		We use a simple energy-conservation model and a model based on Rothlisberger's theory for steady-state water flow in a subglacial conduit to model water movement between lakes in the Adventure subglacial trench region of East antarctica during a 1996-98 jokulhlaup. Using available field evidence to constrain the models suggests that water flow would likely be accommodated in a tunnel with a cross…		-
Numerical modelling of flood flows over irregular topography		In solving the hyperbolic equations of environmental shallow water flows, computational difficulty arises when the topography is irregular. In particular, under a conventional operator-splitting framework, a very small time step is often necessary to ensure stability, and this limitation on the time step is dictated by the magnitude of the source terms in relation to the irregular topography and …	floods & floodworks; river engineering; dams, barrages & reservoirs	-
Numerical modelling of glacial lake outburst floods using physically based dam-breach models		The instability of moraine-dammed proglacial lakes creates the potential for catastrophic glacial lake outburst floods (GLOFs) in high-mountain regions. In this research, we use a unique combination of numerical dam-breach and two-dimensional hydrodynamic modelling, employed within a generalised likelihood uncertainty estimation (GLUE) framework, to quantify predictive uncertainty in model output…		-		1
Numerical simulation of the paleohydrology of glacial Lake Oshkosh, eastern Wisconsin, USA		Proglacial lakes, formed. during retreat of the Laurentide ice sheet, evolved quickly as outlets became ice-free and the earth deformed through glacial isostatic adjustment. With high-resolution digital elevation models (DEMs) and GIS methods, it is possible to reconstruct the evolution of surface hydrology. When a DEM deforms through time as predicted by our model of viscoelastic earth relaxatio…	Lake Oshkosh; outburst flood; glacial isostasy; paleohydrology; GIS; Great Lakes; proglacial lake	-									1
Numerical studies of ice flow over subglacial geothermal heat sources at Grimsvotn, iceland, using Full Stokes equations		[ 1] The importance of studying geothermal heat sources under glaciers lies in: ( 1) the potential for jokulhlaups from such sites; ( 2) the potential for enhanced sliding of ice masses caused by meltwater lubrication of the ice-bedrock interface; and ( 3) the potential to gain a deeper understanding of the interaction between the geothermal system and the overlying ice. We study the temporal evo…		-					1
NUMERICAL-STUDIES OF JOKULHLAUPS				-
OBJECTIVES AND PREVENTION METHODS FOR GLACIER LAKE OUTBURST FLOODS (GLOFS)				-
Observation of surface seismic activity changes of an Alpine glacier during a glacier-dammed lake outburst		During the 2004 outburst flood of Gornersee, Switzerland, we observed surface microseismic activity (so-called icequakes) near the glacier-dammed lake on Gornergletscher. Using surface waves, we located near-surface tensile fracturing events by inverting time delays using a quasi-Newton scheme. We located 8520 near-surface events with uncertainties of less than 10 m. Seismic activity increased du…		-				1
Observations of Runoff and Sediment and Dissolved Loads from the Greenland Ice Sheet at Kangerlussuaq, West Greenland, 2007 to 2010		Observations from 2007 to 2010 of runoff, sediment and solute delivery from a segment of the Greenland Ice Sheet (GrIS) and the proglacial landscape draining into the fjord at Kangerlussuaq are presented. The observations include at least three jokulhlaups and extreme recordings from 2010. The average runoff from the 9743 km(2) catchment was 377 mm (min. 267 mm and max. 565 mm) and the sediment d…	Runoff; sediment transport; solute transport; sediment delivery; erosion; Kangerlussuaq; Greenland	-								1
Observed runoff, jokulhlaups and suspended sediment load from the Greenland ice sheet at Kangerlussuaq, West Greenland, 2007 and 2008		This study fills the gap in hydrologic measurements of runoff exiting a part of the Greenland ice sheet (GrIS), the Kangerlussuaq drainage area, West Greenland. The observations are of value for obtaining knowledge about the terrestrial freshwater and sediment output from part of the GrIS and the strip of land between the ice sheet and the ocean, in the context of varying ice-sheet surface melt a…		-								1
Obstacle marks as palaeohydraulic indicators of Pleistocene megafloods		Pleistocene megafloods generated several large-scale obstacle marks that could not be interpreted hydraulically with the present knowledge of submerged obstacles. Thus, flume and field data of classical obstacle marks, characterised by a frontal scour hole and an adjacent depositional ridge, are analysed to estimate flow velocities from obstacle mark geometry, especially scour depths, length, wid…	local scour; obstacle mark; outburst flood; palaeoflood reconstruction; palaeohydrology; sedimentary structure	-
OBSTACLE MARKS PRODUCED BY FLOW AROUND STRAndeD ICE BLOCKS DURING A GLACIER OUTBURST FLOOD (JOKULHLAUP) IN WEST Greenland		The effects of glacier ice block grounding on the morphology and sedimentology of proglacial fluvial outwash were examined during a glacier outburst flood or jokulhlaup, near Sondre Stromfjord, west Greenland. Observations made during and after the 1987 jokulhlaup both on the surface of an ice contact delta and within a confined valley sandur plain provided information about the formation of ice …		-								1
OCCURRENCE OF HYPERPYCNAL FLOWS AND HYBRID EVENT BEDS RELATED TO GLACIAL OUTBURST EVENTS IN A LATE ORDOVICIAN PROGLACIAL DELTA (MURZUQ BASIN, SW Libya)		A Late Ordovician glacially related delta is documented based on architecture and fades from outcrops in the western Murzuq Basin (Libya). Sandstone megabeds highlight clinoform geometries of a proglacial, low-angle, shallow-water delta. The progradational wedge extends over 25 km from the SSE to the NNW and is about 100 m thick. Two types of clinothems have been distinguished, and eleven facies …		-
On the Clague-Mathews relation for jokulhlaups		In the empirical study of jokulhlaups, the peak discharge, Q(max),and water volume drained by the ice-dammed lake during the floods, V-t, appear to follow a power-law relation Q(max) = KVtb, where K are b are constants determined from field data. First identified by Clague and Mathews (1973), this relation is a useful reference for predicting flood magnitude, but its physical origin remains uncle…		-
On the formation of supraglacial lakes on debris-covered glaciers		Analyses of satellite imagery obtained in 1989-1990 and topographic maps from 1966 have been undertaken for the glacierized areas of Bhutan, It has been found that where supraglacial lakes have formed since 1966, surface gradients of the glaciers concerned were in all cases less than 2 degrees. At gradients of 2-10 degrees supraglacial ponds can form but tend to be transient due to the opening an…		-		1
On the formation of the tunnel valleys of the southern Laurentide ice sheet		Catastrophic releases of meltwater, produced by basal melting and stored for decades in subglacial reservoirs at high pressure, may have been responsible for eroding the broad, deep tunnel valleys that are common along the margins of some lobes of the southern Laurentide ice sheet. We surmise that these releases began when the high water pressure was transmitted to the margin through the substrat…		-
On the water hazards in the trans-boundary Kosi River basin		The Kosi River is an important tributary of the Ganges River, which passes through China, Nepal and India. With a basin area of 71 500 km(2), the Kosi River has the largest elevation drop in the world (from 8848m of Mt Everest to 60m of the Ganges Plain) and covers a broad spectrum of climate, soil, vegetation and socioeconomic zones. The basin suffers from multiple water related hazards includin…		-		1
One-dimensional hydrodynamic modeling of GLOF and impact on hydropower projects in Dhauliganga River using remote sensing and GIS applications		This study presents the one-dimensional hydrodynamic modeling for the Glacier Lake Outburst Flood (GLOF) simulation for the six hydroelectric (HE) power projects in Dhauliganga River of Alaknanda Basin. ArcGIS and HEC-GeoRAS extension is used for the whole river GIS database creation. Elevation values and cross-sections were taken from digital elevation models. The initial flow hydrographs were u…	Hydrodynamic modeling; MIKE11; Glacier lake; GLOF simulation	-
Optical remote sensing techniques in high-mountain environments: application to glacial hazards		Remote sensing studies have shown that glaciers and their proximal environments exhibit unique temporal, spatial and spectral characteristics that can be analysed to better quantify glacial hazard potential. In this review, the optical remote sensing data sources available to glacial hazard assessors are considered and the range of information on glacial environments that can be derived is analys…	glacial hazards; hazard assessment; mountain glaciers; optical remote sensing	-
Organic enrichment and structure of macrobenthic communities in the glacial Baker Fjord, Northern Patagonia, Chile		In this study we describe community parameters such as densities, biomasses, species composition, feeding modes and normalized biomass size-spectra (NBSS) of macrobenthic invertebrate communities from three stations located in the Baker Fjord obtained on four seasonal campaigns in 2008 and 2009. The macrobenthic communities were dominated by small-bodied polychaetes (Paraonidae, Capitellidae and …	Baker Fjord; benthic communities; environmental relationships; organic matter in sediments	-											1
Origin of glacial-fluvial landforms in the Azas Plateau volcanic field, the Tuva Republic, Russia: Role of ice-magma interaction		The basaltic Azas Plateau volcanic field is located in the Tuva Republic of the Russian Federation. The area was glaciated multiple times, and the field is characterized by the formation of subglacial volcanoes called tuyas, but subaerial volcanoes and lava fields also exist. A combined study of remote sensing and field observations in the vicinity of the tuyas in the southeastern Azas Plateau vo…	Siberia; Azas Plateau; tuya; jokulhlaup; flood; ice sheet	-
Origin of Pleistocene outwash plains in various topographic settings, southern Poland		Salamon, T.: Origin of Pleistocene outwash plains in various topographic settings, southern Poland. Boreas, 10.1111/j.1502-3885.2008.00049.x. ISSN 0300-9483. The style of Pleistocene outwash sedimentation in the foreland of the central European Mountains (the Carpathians and Sudetes) was controlled to a large extent by the topography. The deposits of three outwash plains formed in various morphol…		-
Origin of the outburst flood from Glacier de Tete Rousse in 1892 (Mont Blanc area, France)		Extensive field measurements and historical data have been used to re-analyse the cause of the outburst flood from Glacier de Tete Rousse that devastated the village of Saint-Gervais-Le Fayet, French Alps in 1892, causing 175 fatalities. The origin of this disaster was the rupture of an intraglacial cavity in Glacier de Tete Rousse that released 200 000 m(3) of water and ice. All previous studies…		-				1
Origins of massive-type sandstones in braided river systems		This study details largely ignored massive-type, predominantly structureless sandstones preserved within braided fluvial successions of Carboniferous to Triassic age. Architectural element analysis reveals that these sediments were deposited within sand-dominated perennial systems of low braiding index. Cross-stratified braid bar deposits are interbedded with, and laterally equivalent to geometri…	massive-type sandstones; braided river systems	-
Oscillatory subglacial drainage in the absence of surface melt		The presence of strong diurnal cycling in basal water pressure records obtained during the melt season is well established for many glaciers. The behaviour of the drainage system outside the melt season is less well understood. Here we present borehole observations from a surge-type valley glacier in the St Elias Mountains, Yukon Territory, Canada. Our data indicate the onset of strongly correlat…		-									1
Outburst and rainfall-induced peak runoff events in glacierised alpine basins		The impact of rainfall on runoff from the highly glacierised basins containing Findelengletscher and Gornergletscher, Pennine Alps, Switzerland, is assessed for the periods May through September 1987 and 1993. Several major rainstorms produced high peak discharges in both seasons. Runoff response to prolonged heavy rainfall varied during the ablation season in both basins, but also differed betwe…	glacier outburst flood; transient snowline; basin hypsometry; rainfall; glacierised basin	-				1
Outburst and rainfall-induced peak runoff events in highly glacierized Alpine basins		The effect of rainfall on runoff from the highly glacierized basins containing Findelengletscher and Gornergletscher, Pennine Alps, Switzerland, is assessed for the periods May-September 1987 and 1993. Several major rainstorms produced high peak discharges in both seasons. Runoff response to prolonged heavy rainfall varied during the ablation season in both basins, but also differed between the t…	peak runoff; Alpine basins; glacierized basins; basin hypsometry; transient snow-line; rainfall-induced floods	-				1
Outburst debris-flows from failure of natural dams		Natural dams that may produce hazardous outburst debris flows as a result of dam failure are formed by landslides, Late Holocene glacial moraines, glaciers, and volcanic activity. Sooner or later, most natural dams fail, commonly by overtopping followed by surface erosion. Failure may be slow, resulting in minimal downstream flooding, or it may be catastrophic, releasing large amounts of water an…		-
Outburst flood evolution at Russell Glacier, western Greenland: effects of a bedrock channel cascade with intermediary lakes		Glacial lake outburst floods have produced a distinctive and widespread Quaternary record both onshore and offshore via widespread and intense geomorphological impacts, yet these impacts remain poorly understood due to a lack of modern analogues. This study therefore makes a systematic quantification of the evolution of a bedrock-channelled outburst flood. Channel topography was obtained from dig…	Megaflood; Jokulhlaup; GLOF; Hydraulics; Hydropeaking; Hydraulic ponding	-								1
Outburst flood hazard for glacier-dammed Lac de Rochemelon, France		Supraglacial Lac de Rochemelon was formed 50 years ago behind an ice dam and grew steadily until 2004. In October 2004, the volume of the lake reached 650 000 m(3), bringing its surface within 0.2 m of the top of the ice dam. To eliminate the threat to towns located below in the event of an overflow, the lake was drained artificially in October 2004 and during the summer of 2005. Once the volume …		-				1
Outburst flood hazard: Case studies from the Tien-Shan Mountains, kyrgyzstan		More than 2000 of mountain lakes covering more than 0.1 ha exist in a territory of kyrgyzstan. Nearly 20% of them are dangerous because of instability of lake dams, frequent overflows and melting of buried ice inside the moraine dams. According to the kyrgyz lake inventory, 328 lakes are at risk of outburst and 12 lakes are considered as actually dangerous. Since 1952 more than 70 disastrous case…	Genetic classification of lakes; Outburst floods; Hazards assessment; Petrov; Adygine and Koltor lakes; Tien-Shan; Glacial lake; kyrgyzstan	-	1
Outburst flood origin of the Central Kalamazoo River Valley, Michigan, USA		Geomorphic evidence and stratigraphic information from boreholes suggest that the oversized Central Kalamazoo River Valley (CKRV) in southwest Michigan resulted from a catastrophic outburst flood emanating from subglacial channels under the Saginaw lobe of the Laurentide Ice Sheet. The CKRV occurs as a deeply incised trench over 2 km wide and in excess of 50 m deep situated in a reentrant formed …		-									1
Outburst flood sedimentation on the proglacial Tuttle Canyon alluvial fan, Owens Valley, California, USA		Surface deposits of the Tuttle Canyon alluvial fan, eastern Sierra Nevada piedmont, California, mainly accumulated during a catastrophic outburst flood probably triggered by the failure of a moraine-dammed lake in the steep (16.4 degrees), high-relief (2361 m), and high-elevation (to 4275 m) catchment. Moraines of the catchment and upper fan (Facies A) comprise unsorted sand to blocks derived fro…		-									1
Outburst flooding and the initiation of ice-stream surges in response to climatic cooling: A hypothesis		Outburst flooding from subglacial reservoirs and associated surging of ice-streams are caused by processes following climatic cooling that produce ice-shelf grounding on proglacial sills trapping subglacial water, according to an hypothesis presented here. Glaciers often advance into proglacial water bodies. Cooling may allow ice-shelf formation and advance causing grounding on a proglacial sill,…	Heinrich events; Jokulhlaups; ice sheets; ice shelves	-
Outburst flooding at Franz Josef Glacier, South Westland, New Zealand		During February and March 2003, a series of unusual events involving supraglacial flooding and ice collapse affected an area of Franz Josef Glacier, South Westland, New Zealand. This paper describes these events and examines rainfall and river stage data in order to explain their occurrence. Relationships between rainfall events, supraglacial flooding, and stage of the Waiho River suggest that su…	Franz Josef Glacier; glacier hydrology; glacier outburst floods; jokulhlaups; Waiho River; natural hazard	-
OUTBURST FLOODS FROM GLACIAL LAKE Missoula				-									1
OUTBURST FLOODS FROM GLACIAL LAKE Missoula - COMMENT				-									1
Outburst floods from glacier-dammed lakes: The effect of mode of lake drainage on flood magnitude		Published accounts of outburst floods from glacier-damned lakes show that a significant number of such floods are associated not with drainage through a tunnel incised into the basal ice -the process generally assumed-but rather with ice-marginal drainage, mechanical failure of part of the ice dam, or both. Non-tunnel floods are strongly correlated with formation of an ice dam by a glacier advanc…	breach hydraulics; outburst floods; subglacial lakes; temperate glaciers	-							1
Outburst floods of the ice-dammed lakes in the SW of Tuva, southern Siberia		We conducted a preliminary study of high mountain depressions of the SW Tuva (Mountains of Southern Siberia). For the first time the hydrological system transformation and landscape evolution in the region was considered in detail in relation to the cataclysmic outburst floods of ice-dammed lakes. The paper presents the geological and geomorphological evidence of ice-dam lake development and drai…	ice-dammed lakes; outburst floods; radiocarbon dating; SW Tuva; mountains of southern Siberia	-
Outburst floods of the Maly Yenisei. Part I		The Yenisei, the largest river flowing to the Arctic Ocean, repeatedly hosted cataclysmic floods during the Pleistocene. The largest of the known floods likely originated from palaeolakes in northern Mongolia, at the headwaters of the Little, or Maly, Yenisei. These ancient floods are among the greatest known globally. They left giant gravel dunes and wide abandoned channels in the Kyzyl basin, a…	Outburst floods; megafloods; cataclysmic floods; glacial dams; Maly Yenisei; Bolshoy Yenisei; palaeolake Darhad; Darhad basin; Sayan	-
Outburst floods of the Maly Yenisei. Part II - new age constraints from Darhad basin		Some of the largest cataclysmic floods of the Quaternary followed multiple breaches of glaciers damming the headwaters of the Maly Yenisei river in southern Siberia. The shorelines of the impounded lake in Darhad basin suggest at least four depths of 290, 175, 145, and 65m. Fossil evidence, together with previous C-14 and luminescence dating, indicates the existence of a deep lake during MIS 3; t…	Outburst floods; megafloods; cataclysmic floods; glacial dams; Maly Yenisei; Bolshoy Yenisei; palaeolake Darhad; Darhad basin; Sayan	-
Palaeoenvironmental record of glacial lake evolution during the early Holocene at Sokli, NE finland		The development of a glacial lake impounded along the retreating, northeastern ice margin of the Fennoscandian Ice Sheet during the last deglaciation and environmental conditions directly following the early Holocene deglaciation have been studied in NE finland. This so-called Sokli Ice Lake has been reconstructed previously using topographic and geomorphologic evidence. In this paper a multiprox…		-						1
Palaeohydrology and sedimentary impacts of jokulhlaups from Kverkfjoll, iceland		Jokulhlaups (glacial outburst floods) occur frequently within iceland and within most glaciated regions of the world. The largest jokulhlaups known to have occurred within iceland drained from the northern margin of the Vatnajokull and along the Jokulsa a Fjollum during the Holocene. However, little is known about the number, age and flow characteristics of the Jokulsa a Fjollum jokulhlaups. One …	Kverkfjoll; outburst floods; jokulhlaups; rheology; flow characteristics; iceland	-					1
Paleoflood marks in sandur morphometry as the result of the glacier surge (NW Poland)		In the Pomeranian marginal zone of the last Pleistocene glaciation specific morphometric features are found. They represent indicators of surging events affecting the individual outlet glacier lobes of the scandinavian Ice Sheet margin. They are assumed to have been active during the climate warming of the Weichselian glaciation decay. Many tunnel valleys deep-rooted in the proximal slopes of the…	glacier surge; marginal zone; outburst flood; Pomerania; sandur morphometry	-
Paleohydraulic reconstruction of the largest Glacial Lake Missoula draining(s)		Glacial Like Missoula (GLM) was the source of Earth's largest known peak flood discharges onto the Channeled Scabland, northwestern United States. The original studies of GLM were based on geomorphological mapping of lake sediments and shorelines. More recently, studies have emphasized the computational fluid dynamics of downstream megaflood routing and characteristics in the Channeled Scabland a…		-									1
Paleohydraulics of the last outburst flood from glacial Lake Agassiz and the 8200 BP cold event		During the last deglaciation of North america, huge proglacial lakes formed along the southern margin of the Laurentide Ice Sheet. The largest of these was glacial Lake Agassiz, which formed about 11.7 C-14 kyr and drained into Hudson Bay about 7.7 C-14 kyr (8.45 cal kyr). Overflow from these lakes was variably directed to the Mississippi, St. Lawrence and Mackenzie drainage systems and it is tho…		-									1
PALEOHYDROLOGY OF LATE PLEISTOCENE SUPERFLOODING, ALTAY MOUNTAINS, Siberia		Cataclysmic flooding is a geomorphological process of planetary significance. Landforms of flood origin resulted from late Pleistocene ice-dammed lake failures in the Altay Mountains of south-central Siberia. Peak paleoflows, which exceeded 18 x 10(6) cubic meters per second, are comparable to the largest known terrestrial discharges of freshwater and show a hydrological scaling relation to flood…		-
Paleomagnetic and tephra evidence for tens of Missoula floods in southern Washington		Palleomagnetic secular variation and a hiatus defined by two tephra layers confirm that tens of floods from Glacial Lake Missoula, Montana, entered Washington's Yakima and Walla Walla Valleys during the last glaciation. In these valleys, the field evidence for hiatuses between floods is commonly subtle. However, paleomagnetic renumence directions from waterlaid silt beds in three sections of rhyt…	Glacial Lake Missoula; jokulhlaups; tephra; paleomagnetic secular variation	-									1
PALEOMAGNETIC EVIDENCE FOR REPEATED GLACIAL LAKE Missoula FLOODS FROM SEDIMENTS OF THE SANPOIL RIVER VALLEY, NORTHEASTERN Washington				-									1
Palimpsest tunnel valleys: evidence for relative timing of advances in an interlobate area of the Laurentide ice sheet		During retreat from the late Wisconsinan maximum advance in the Great Lakes region of North america, the Laurentide ice sheet margin became distinctly lobate. The Lake Michigan, Saginaw, and Huron-Erie lobes converged in southern Michigan and Indiana, U.S.A. to form a complex interlobate region. Some time after the glacial maximum, the Lake Michigan lobe advanced over landscapes previously formed…		-
Paraglacial and paraperiglacial landsystems: concepts, temporal scales and spatial distribution		The Pleistocene Earth history has been characterized by major climatic fluctuations. During glacial periods, ice may have covered around 30 per cent of the Earth surface compared to approximately 10 per cent nowadays. With global change, polar environments and other montainous glacial environments of the world are presently undergoing the most important changes since the end of the Last Glacial M…	climate change; permafrost; thermokarst; Arctic; coastal system; river system; cascading system	-
PARTICLE FABRIC AND SEDIMENTATION OF STRUCTURELESS SAND, SOUTHERN iceland		The interpretation of structureless sand units, in terms of flow character and associated depositional mechanism, is notoriously difficult to deduce from localized outcrop, because such units offer no macroscopic features with which to make distinctions of flow parameters. This investigation assesses the significance of directional properties of particle-fabric samples taken both vertically and h…		-					1
Peak discharge estimates of glacial-lake outburst floods and "normal" climatic floods in the Mount Everest region, Nepal		Glacial-lake outburst floods (GLOFs) in the Mount Everest region of Nepal on 3 September 1977 and 4 August 1985 dramatically modified channels and valleys in the region by eroding, transporting, and depositing large quantities of sediment for tens of kilometers along their flood routes. Prior to this research, the GLOF discharges had not been determined and the hydrology of "normal" climatic floo…	glacial-lake outburst floods; seasonal high flow floods; paleoflood hydrology; step-backwater modeling; peak discharge estimates; Mount Everest	-		1
People's risk perception of glacial lake outburst flooding: a case of Tsho Rolpa Lake, Nepal		Previous research indicates that people's perception of risk from a particular hazard positively influences their adoption of effective mitigation strategies and responses. This research investigates the risk perceptions of people living downstream from Tsho Rolpa Glacial Lake of Nepal. Field surveys revealed that people living beneath the Tsho Rolpa glacial lake possess a low risk perception des…	glacial lake outburst flood; hazard; Nepal; risk perception	-		1
Performance of ASTER and SRTM DEMs, and their potential for assessing glacial lakes in the Lunana region, Bhutan Himalaya		To assess the potential volume of a glacial lake outburst flood (GLOF) more precisely than in previous studies, we analyze ground survey data and remote-sensing digital elevation models (DEMs) around glacial lakes in the Lunana region, Bhutan. Based on a DEM generated from differential GPS ground surveys, we first evaluate the relative accuracies of DEMs produced by the Advanced Spaceborne Therma…		-		1
PERIODIC DRAINAGE OF ICE-DAMMED LAKES AS A RESULT OF VARIATIONS IN GLACIER VELOCITY		Previous discussions of the catastrophic drainage of ice-dammed lakes have centred on mechanisms where characteristics of the lake are crucial to drainage initiation, for example dam flotation or tunnel formation at a critical lake depth. This paper describes a mechanism for lake drainage where drainage initiation depends on the characteristics of the glacier and is independent of the characteris…	ICE-DAMMED LAKES; GLACIER HYDROLOGY; BASAL ICE; JOKULHLAUP	-					1
PERIODIC JOKULHLAUPS FROM PLEISTOCENE GLACIAL LAKE Missoula - NEW EVIDENCE FROM VARVED SEDIMENT IN NORTHERN IDAHO AND Washington				-									1
PERIODIC JOKULHLAUPS FROM PLEISTOCENE GLACIAL LAKE Missoula - NEW EVIDENCE FROM VARVED SEDIMENT IN NORTHERN IDAHO AND Washington - REPLY				-									1
PERIODIC JOKULHLAUPS FROM PLEISTOCENE GLACIAL LAKE Missoula - NEW EVIDENCE FROM VARVED SEDIMENTS IN NORTHERN IDAHO AND Washington - COMMENT				-									1
Photogrammetric monitoring of glacier margin lakes		The growing number of glacier margin lakes that have developed due to glacier retreat have caused an increase of dangerous glacier lake outburst floods (GLOFs) in several regions over the last decade. This normally causes a flood wave downstream the glacier. Typically, such an event takes few to several hours. GLOF scenarios may be a significant hazard to life, property, nature and infrastructure…		-
PHOTOGRAMMETRIC MONITORING OF GLACIER MARGIN LAKES		The growing number of glacial margin lakes that have developed due to glacier retreat, have caused an increase of dangerous Glacial Lake Outburst Floods (GLOFs) in several regions over the last decade. A GLOF can occur when the water from the lake finds a path underneath the bottom of the glacier and the lake is draining rapidly. This causes normally a flood wave downstream the glacier. Typically…	Photogrammetric network; image sequence processing; disaster monitoring	-											1
Physical-scale modelling of jokulhlaups (glacial outburst floods) with contrasting hydrograph shapes		Jokulhlaups (glacial outburst floods) are hazards in many glaciated environments. Jokulhlaups generated by different trigger mechanisms have different hydrograph shapes. Field evidence indicates that jokulhlaups with different hydrograph shapes produce different impacts. However, little attention has been paid to understanding the controls on jokulhlaups with differing hydrograph shapes and their…	jokulhlaups; flume; physical-scale modelling; field prototypes; floods; jokulhlaup deposits	-
PILOT STUDIES WITH A PHOTOGRAMMETRIC GLACIER LAKE OUTBURST FLOOD EARLY WARNING SYSTEM		Glacier Lake Outburst Floods (GLOFs) depict an environmental risk with an increasing damage potential in many regions of the world. GLOFs are often caused by glacier margin lakes, which suddenly find a drainage path underneath the bottom of a glacier, which is destabilized and retreating as a consequence of local or global climate changes. In a typical GLOF event, a glacier margin lake may drain …	Photogrammetric network; image sequence processing; disaster monitoring	-											1
PLEISTOCENE CATACLYSMIC FLOODING ALONG THE BIG LOST RIVER, EAST CENTRAL IDAHO		Relationships between cataclysmic flood-generated landforms and flood hydraulics were investigated along Box Canyon, an 11 km long bedrock gorge of the lower Big Lost River. Geomorphic mapping along Box Canyon indicates that a cataclysmic flood completely inundated the gorge, resulting in large-scale erosional and depositional features on the adjacent basalt upland. Step-backwater hydraulic model…		-
Pleistocene glacimarine sedimentation on the continental slope off Vancouver Island, British Columbia		Cordilleran Ice Sheet activity has had a significant influence on glacimarine sediment transport and deposition on the western Canadian continental slope resulting in distinct sediment facies. Here we present lithogenic sediment grain size distributions (grains >250 mu m g(-1), % >63 mu m, % 10 to 60 mu m, and % 2 to 4 mu m) and mass accumulation rates (MAR) from a marine core (MD02-2496) collect…	Cordilleran ice sheet; Glacimarine sediment; ice rafted debris; Cyclic sedimentation	-									1
Pleistocene lake outburst floods and fan formation along the eastern Sierra Nevada, California: implications for the interpretation of intermontane lacustrine records		Variations in the rock flour fraction in intermontane lacustrine sediments have the potential to provide more complete records of glacier fluctuations than moraine sequences, which are subject to erosional censoring. Construction of glacial chronologies from such records relies on the assumption that rock flour concentration is a simple function of glacier extent. However, other factors may influ…		-									1
Pleistocene megafloods in the northeast Pacific		Massive discharges of freshwater from the glacial take Missoula to the northeast Pacific Ocean are thought to have sculpted the Channeled Scablands of eastern Washington and debouched via the Columbia River near 46 degrees N. The dynamics and timing of these events and their impact on northeast Pacific circulation remain uncertain. Here we date marine records of anomalous freshwater inputs to the…		-									1
Pleistocene sandur deposits represent braidplains, not alluvial fans		Weichselian sandar in NE Poland show characteristics that are inconsistent with the commonly accepted alluvial-fan-like model for outwash deposition and sandur formation. Analysis of the lithofacies and their vertical and lateral transitions indicates that the Polish sandar developed as braidplains, not as alluvial fans. Analysis of the geomorphic conditions under which modern sandar form, indica…		-					1
Possible Juventae Chasma subice volcanic eruptions and Maja Valles ice outburst floods on mars: Implications of mars Global Surveyor crater densities, geomorphology, and topography		[1] This article discusses image, topographic, and spectral data from the mars Global Surveyor (MGS) mission that provide new information concerning the surface age, geomorphology, and topography of the Juventae Chasma/Maja Valles system. Our study utilizes data from two instruments on board MGS: images from the mars Orbiter Camera (MOC) and topography from the mars Orbiter Laser Altimeter (MOLA)…	jokulhlaup; tuya; tindar; chasma; volcanism; thermokarst	-
Possible outburst floods from debris-covered glaciers in the Sierra Nevada, California		A sequence of aerial photographs of Mendel Glacier, a debris-covered glacier in the central Sierra Nevada, California, suggests that at least one outburst flood originated from a subglacial reservoir beneath a prominent mid-glacier surface depression. By 1962, a ring of crevasses 250 m in diameter was centered within the depression, implying recent ice collapse. In 1972, the crevasses had almost …		-
Post-sedimentary transformation of lateral moraines - the tributary tongue basins of the Kviarjokull (iceland)		The Kviarjokull, a southern outlet glacier of the Vatnajokull, is confined in the mountain foreland by lateral moraines measuring a height of up to 150 in. Each of the lateral moraines shows considerable breaches with deviations of the main moraine ridges. The paper discusses the possible origins of these modifications of the lateral moraines as result of: 1) ice overlappings during glacier advan…	lateral moraines; tributary tongue basin; glacier bifurcation; glacier lake outburst; Kvidrjokull	-					1
Potential flood volume of Himalayan glacial lakes		Glacial lakes are potentially dangerous sources of glacial lake outburst floods (GLOFs), and represent a serious natural hazard in Himalayan countries. Despite the development of various indices aimed at determining the outburst probability, an objective evaluation of the thoUSAnds of Himalayan glacial lakes has yet to be completed. In this study we propose a single index, based on the depression…		-		1
Potential for a hazardous geospheric response to projected future climate changes		Periods of exceptional climate change in Earth history are associated with a dynamic response from the geosphere, involving enhanced levels of potentially hazardous geological and geomorphological activity. The response is expressed through the adjustment, modulation or triggering of a broad range of surface and crustal phenomena, including volcanic and seismic activity, submarine and subaerial l…	climate change; geosphere; geological hazard; geomorphological hazard; ocean loading; ice-mass loss	-
Predicting outflow induced by moraine failure in glacial lakes: the Lake Palcacocha case from an uncertainty perspective		Moraine dam collapse is one of the causes of glacial lake outburst floods. Available models seek to predict both moraine breach formation and lake outflow. The models depend on hydraulic, erosion, and geotechnical parameters that are mostly unknown or uncertain. This paper estimates the outflow hydrograph caused by a potential erosive collapse of the moraine dam of Lake Palcacocha in Peru and qua…		-										1
Prediction and assessment of multiple glacial lake outburst floods scenario in Pho Chu River basin, Bhutan		In this study, the characteristic of multiple glacial lake outburst floods (GLOFs) in the Pho Chu River basin in Bhutanese Himalayas is evaluated to help assess the potential impact. Thorthormi Cho (TC) and Lugge Cho (LC) in the east branch and two unnamed lakes labelled A and B in the west branch of Pho Chu are chosen for the study. Numerical models were employed to simulate different involved p…	moraine dam breach; GLOF; simulation; prediction; assessment; Bhutan	-		1
Prediction of Climate Change Forced Mass Movement Processes Induced in Periglacial Areas		Based on glacier retreat and degrading permafrost in high alpine regions across the Bernese Oberland (Central Switzerland), several new hazardous source areas for processes became evident within the last years. The evaluation of susceptible periglacial areas and the assignment of resulting processes by modelling will be one of the major tasks to be solved in near future. The prediction of those p…	Process chains; Permafrost; Mass movements; Climate change; Process modelling	-				1
Prediction of potential outburst floods from a glacial lake due to moraine dam failure		Flood and sediment disasters are frequently caused by outbursts from glacial lakes in the Himalayas of South Asia and other glacier regions of the world. The resulting floods from the glacial lake outburst can cause catastrophic flooding in downstream areas, with serious damage to lives and property. Therefore, there is a pressing need to investigate the outburst of potentially dangerous glacial …	glacial lake outburst; numerical model; Tsho Rolpa glacial lake; potential flood; prediction	-		1
Pre-eruptive volatile content, degassing paths and depressurisation explaining the transition in style at the subglacial rhyolitic eruption of Dalakvisl, South iceland		Many volcanoes express a variety of contrasting eruptive styles with behavioural transitions between explosive and effusive activities. Understanding eruptive mechanisms is of key importance but we currently have little insight into the behavioural controls for rhyolitic eruptions beneath ice. This paper addresses a subglacial rhyolitic eruption at Dalalcvisl in South iceland that involved both e…	Volatiles; Degassing; Subglacial; Rhyolite; Melt inclusions; Volcano-ice interactions; Solubility-pressure relationships	-					1
Preface - The role of outburst floods and glacial meltwater in subglacial and proglacial landform genesis				-
Preface for the thematic issue "glacial lake outburst floods"				-
Present-day sandurs are not representative of the geological record - Sedimentary Geology 152, 1-5 (2002)			sandur; outwash deposits; sedimentary model	-
Prevention of outburst floods from periglacial lakes at Grubengletscher, Valais, Swiss Alps		Flood and debris-flow hazards at Grubengletscher near Saas Balen in the Saas Valley, Valais, Swiss Alps, result from the formation and growth of several lakes at the glacier margin and within the surrounding permafrost. In order to prevent damage related to such hazards, systematic investigations were carried out and practical measures taken. The evolution of the polythermal glacier, the creeping…		-				1
Probabilistic model for eruptions and associated flood events in the Katla caldera, iceland		Eruptions in the subglacial Katla caldera, South iceland, release catastrophic jokulhlaups (meltwater floods). The ice surface topography divides the caldera into three drainage sectors (Ko, So and En sectors) that drain onto Myrdalssandur, Solheimasandur and Markarfljot plains, respectively. In historical times, floods from the Ko sector have been dominant, with only two recorded So events. Geol…	Katla volcano; volcanic eruptions; jokulhlaups; catastrophic floods; probabilistic modeling; simulations; Markov processes; eruption probabilities	-					1
PROBLEMS OF MOUNTAIN HAZARD MAPPING USING SPACEBORNE REMOTE-SENSING TECHNIQUES		Despite the high potential of remote sensing for information acquisition about remote and inaccessible regions, several relief-induced factors hamper or even prohibit the use of spaceborne imagery. These factors, geometric as well as climatic ones, are listed and briefly discussed. Approaches to overcome these problems are set forth. Two case histories about snow avalanche mapping in the Alps usi…		-		1		1
Problems of stability and drainage of ice masses, as surficial sediments, and applications to the late Weichselian glacial event in the north of Ireland		All surficial sediments involve water in mechanisms of stabilization and self-regulation so as to maintain entropy and prolong morphological intactness. During a sediment 'Iifecycle', mass and energy is stored as the sediment builds up, and is expelled from the system by or as water as the sediment degrades. Glacial systems often show an internal (intrinsic) response to external (extrinsic) forci…		-
Processes and rates of post-Little Ice Age proximal sandar incision (southern iceland)		Since the end of the Little Ice Age, glacial outlets of southern iceland have undergone a substantial retreat, which has modified hydrological and sedimentological settings and caused fluvial adjustments. Based on lichenometric dating and topographical measurements, this study demonstrates that proximal sandar adjustment to glacier retreat follows two distinctive stages. The first one can be rega…	iceland; glacial retreat; little ice age; sandur; lichenometry; fluvial adjustment; paraglacial	-					1
PROFESSOR MATHEWS, OUTBURST FLOODS, AND OTHER GLACIOLOGICAL DISASTERS				-
Pro-glacial lake sedimentation from jokulhlaups (GLOF), Blamannsisen, northern norway		Outburst floods from glacier-dammed lakes are major events associated with glacier thinning and volume reduction. This paper investigates jokulhlaups emanating from the glacier-dammed lake Ovre Messingmalmvatn at Rundvassbreen, an outlet glacier of the Blamannsisen ice cap in northern norway. Since 2001, the lake has several times been observed to drain suddenly, causing jokulhlaup outbursts into…	pro-glacial lake; glacier-dammed lake; jokulhlaup outburst; sedimentation rate; sediment dating	-						1
Proglacial lakes: character, behaviour and geological importance		Proglacial lakes are ubiquitous within the Quaternary record and can provide exceptional breadth and depth of palaeoenvironmental information. Present deglaciation is increasing the number and size of proglacial lakes around the world. This study provides a synthesis of knowledge on proglacial lake character and behaviour and critically evaluates the importance of proglacial lakes from a geologic…	Glacial lake; Ice-dammed; Moraine-dammed; Ice-marginal; Ice-contact; Deglaciation	-
Proglacial river stage, discharge, and temperature datasets from the Akuliarusiarsuup Kuua River northern tributary, Southwest Greenland, 2008-2011		Pressing scientific questions concerning the Greenland ice sheet's climatic sensitivity, hydrology, and contributions to current and future sea level rise require hydrological datasets to resolve. While direct observations of ice sheet meltwater losses can be obtained in terrestrial rivers draining the ice sheet and from lake levels, few such datasets exist. We present a new hydrologic dataset fr…		-								1
Progressive incision of the Channeled Scablands by outburst floods		The surfaces of Earth and mars contain large bedrock canyons that were carved by catastrophic outburst floods(1,2). Reconstructing the magnitude of these canyon-forming floods is essential for understanding the ways in which floods modify planetary surfaces(1,2), the hydrology of early mars(3) and abrupt changes in climate(4). Flood discharges are often estimated by assuming that the floods fille…		-									1
Progressive increase in number and volume of ice-marginal lakes on the western margin of the Greenland Ice Sheet		The evolution in number, area and volume of ice-marginal lakes in western Greenland is very poorly documented or understood. It is important to understand ice-marginal lake evolutions because they provide an element of meltwater retention, affect ice-margin character and behaviour, and potentially glacier dynamics. This study uses repeat satellite imagery acquired between 1987 and 2010 to reveal …	Greenland; lake; meltwater; jokulhlaup; GLOF; glacier; runoff	-								1
Promoting science-based, community-driven approaches to climate change adaptation in glaciated mountain ranges: HiMAP		Glaciated mountains remain among the most under-studied regions in the world from a physical, social and climate change perspective, which complicates the development of appropriate adaptation and hazard mitigation approaches. The goal of the High Mountains Adaptation Partnership (HiMAP) project is to create conditions necessary for all the stakeholders who live in, or are dependent upon glacial …		-		1
Propagation of a subglacial flood wave during the initiation of a jokulhlaup		Observations from the jokulhlaup from Grimsvotn in Vatnajokull, southeastern iceland, in 1996 indicate that the jokulhlaup was initiated by the movement of a localised pressure wave that travelled 50 km in 10 h from Grimsvotn to the terminus, forming a subglacial pathway along the glacier bed. Shortly after this wave reached tire terminus, the jokulhlaup was flowing at a high discharge through a …	jokulhlaup; subglacial flood; Grimsvotn; Vatnajokull; sublacial tunnel; heat transfer; supercooling; frozen sediments	-					1
Provenance and deposition of glacial Lake Missoula lacustrine and flood sediments determined from rock magnetic properties		Repeated outburst flooding from glacial Lake Missoula, Montana, affected large areas of Washington during Marine Oxygen Isotope Stage 2 (29-14 ka). We present the first high-resolution rock magnetic results from two sites that are critical to interpreting these outburst floods and that provide evidence of sediment provenance: glacial Lake Missoula, the source of the floods; and glacial Lake Colum…	Glacial Lake Missoula; Rock magnetic properties; Glacial Lake Columbia; Glacial outburst floods; Magnetic hysteresis; Thermomagnetic susceptibility	-									1
Quantifying the combined effects of multiple extreme floods on river channel geometry and on flood hazards		Effects of flood-induced bed elevation and channel geometry changes on flood hazards are largely unexplored, especially in the case of multiple floods from the same site. This study quantified the evolution of river channel and floodplain geometry during a repeated series of hypothetical extreme floods using a 2D full hydro-morphodynamic model (LHMM). These experiments were designed to examine th…	River channel geometry; Conveyance capacity; Numerical modelling; Multiple floods	-
Quantifying the predictability of the timing of jokulhlaups from Merzbacher Lake, kyrgyzstan		Glacier-dammed lakes can yield subglacial outburst floods (jokulhlaups) repeatedly. Predicting flood timing is crucial for hazard mitigation, but incomplete understanding of flood-initiation physics makes this challenging. Here we examine the predictability of the timing of jokulhlaups from Merzbacher Lake, kyrgyzstan, using five flood-date prediction models of varying complexity. The simplest mo…		-	1
Quaternary break-out flood sediments in the Peshawar basin of northern Pakistan		The presence of horizontally bedded, fining upward sequences of sands, silts, and clays throughout the Peshawar basin of northern Pakistan has previously been ascribed to Pleistocene lakes within the basin. Close inspection of these sediments, however, show sedimentological properties that suggest these stacked sequences are more characteristic of deposits of periodic break-out flood deposits and…	break-out flood sediments; Peshawar basin; Pleistocene lakes; lacustrine deposits	-
Quaternary fans and terraces in the Khumbu Himal south of Mount Everest: their characteristics, age and formation		Large fans and terraces are frequent in the Khumbu Himal within the high Himalayan valleys south of Mt. Everest. These features are composed of massive matrix- and clast-supported diamicts that were formed from both hyperconcentrated flows and coarse-grained debris flows. Cosmogenic radionuclide (CRN) exposure ages for boulders on fans and terraces indicate that periods of fan and terrace formati…		-		1
Quaternary paleolake formation and cataclysmic flooding along the upper Yenisei River		A suite of geomorphological and sedimentological features in the catchment of the upper Yenisei River in the Sayan mountains of southern Siberia testifies to the occurrence of cataclysmic floods that flowed down the river. Evidence of large-scale high-energy flood events includes: 1) gravel dunes, up to a few meters high and spaced 50 to 80 m apart, in the Kyzyl Basin 2) landforms such as hanging…	Quaternary; Siberia; Mongolia; Floods; Paleolakes; Glacial history	-
r.randomwalk v1, a multi-functional conceptual tool for mass movement routing		We introduce r.randomwalk, a flexible and multifunctional open-source tool for backward and forward analyses of mass movement propagation. r.randomwalk builds on GRASS GIS (Geographic Resources Analysis Support System - Geographic Information System), the R software for statistical computing and the programming languages Python and C. Using constrained random walks, mass points are routed from de…		-	1
Radiocarbon dating of mid-Holocene megaflood deposits in the Jokulsa a Fjollum, north iceland		Two megafloods in the canyon of the Jokulsa a Fjollum, the major northern routeway for glaciovolcanic floods from Vatnajokull, have been closely dated by C-14 AMS dates from Betula macrofossils within peat immediately below beds of flood- deposited sand. Ages of c. 4415 and c. 4065 yr BP ( 5020 and 4610 cal. yr BP) are consistent with the presence of the Hekla 4 tephra ( c. 3830 yr BP) resting on…	Jokulhlaups; radiocarbon dating; slackwater sediment; megafloods; mid-Holocene; iceland	-					1
Raising awareness of the impacts of climate change: Initial steps in shaping policy in Nepal		Climate change is happening and people have begun to feel its impacts on their daily lives. Clear indications of these impacts can be seen on Himalayan glaciers, which are melting at rapid rates and consequently form massive glacial takes (Figure 1), with a risk of catastrophic glacial lake outburst floods (GLOFs). GLOFs result in loss of lives, property, and costly infrastructure, as well as dis…		-		1
Rapid expansion of glacial lakes caused by climate and glacier retreat in the Central Himalayas		Glacial lake outburst floods are among the most serious natural hazards in the Himalayas. Such floods are of high scientific and political importance because they exert trans-boundary impacts on bordering countries. The preparation of an updated inventory of glacial lakes and the analysis of their evolution are an important first step in assessment of hazards from glacial lake outbursts. Here, we…	glacial lake; glacial lake outburst flood; Poiqu River basin; Landsat; natural hazards	-		1
RAPID GEOMORPHIC CHANGE CAUSED BY GLACIAL OUTBURST FLOODS AND DEBRIS FLOWS ALONG TAHOMA CREEK, MOUNT RAINIER, Washington, USA		As part of a hazards-assessment study, we examined the nature and rate of geomorphic change caused by outburst floods and debris flows along Tahoma Creek, Mount Rainier, since 1967. Archival aerial photographs of the area proved to be a rich source of qualitative geomorphic information. On the basis of limited direct evidence and considerations of stream hydrology, we conclude that nearly all of …		-									1
RAPID GROWTH OF A GLACIAL LAKE IN KHUMBU-HIMAL, Himalaya - PROSPECTS FOR A CATASTROPHIC FLOOD		The growth of a lake on the Imja Glacier, Khumbu Himal, was traced from maps and photographs supplied by several sources. There were five small ponds in the 1950s. A single lake with islands formed by 1975. A small island existing in 1978 had disappeared in 1980. The lake area was 0.54 km2 in 1984, and had become slighly larger by 1991. The comparison of the lake water volumes of ''Imja Glacier L…		-		1
Rapid sediment entrainment and englacial deposition during jokulhlaups				-
Rare and dangerous: Recognizing extra-ordinary events in stream channels		Extreme-value statistics has taught us that flood flows can be estimated reasonably well, and that while extreme flows are rare, they are certain to occur. The physical process of flooding is reasonably well understood. However, this knowledge does not extend to steep creeks with potentially highly mobile beds. Most infrastructures on such creeks have been designed for clearwater floods with retu…		-
Real time Monitoring for Imja Glacial Lake in Himalaya - Global Warming Front Monitoring System		Imja Tsho Lake is one of the fastest growing in the entire Himalayan region. Regular monitoring based on scientific data and information of the lake is crucial. To initiate an early warning system, a wireless LAN has been established using innovative geo-ICT tools and technologies to connect different field monitoring devices for real time monitoring and early warning system for potential GLOF. T…	Glacial Lake Outburst Flood; Field Server; real time monitoring; global warming; Digital Asia	-		1
RECENT CLIMATIC-CHANGE AND CATASTROPHIC GEOMORPHIC PROCESSES IN MOUNTAIN ENVIRONMENTS		Climatic warming during the last 100-150 years has resulted in a significant glacier ice loss from mountainous areas of the world. Certain natural processes which pose hazards to people and development in these areas have accelerated as a result of this recent deglaciation. These include glacier avalanches, landslides and slope instability caused by glacier debuttressing, and outburst floods from…		-
Recent debris flow occurrences associated with glaciers in the Alps		Debris flows from glacier forefields, triggered by heavy rain or glacial outbursts, or clamming of streams by ice avalanches, pose hazards in Alpine valleys (e.g. the south side of Mount Blanc). Glacier-related debris flows are, in part, a consequence of general glacier retreat and the corresponding exposure of large quantities of unconsolidated, unvegetated, and sometimes ice-cored glacial sedim…	debris flow; glacial outburst floods; climate change; European Alps	-				1
Recent extreme weather events in the Nepal Himalayas		Extreme weather events and disasters induced by them seem to be on the increase in the Himalayas in recent years. If glacier lake outburst floods (GLOF) occur more frequently in the high mountains, then floods and landslide events become more frequent in the middle hills and the lower plains. Such disasters associated with extreme weather events cause widespread damage to life and property and de…	extreme weather events; natural disasters; glacial lake outburst floods; landslide damming; floods; Nepal; physiography; Himalayas	-		1
Recent glacier and glacial lake changes and their interactions in the Bugyai Kangri, southeast Tibet		Glaciers in the Bugyai Kangri are located in a transition zone from southeast Tibet, where monsoonal temperate glaciers dominate, to inner Tibet, where continental glaciers dominate. Here we analyze glacier and glacial lake changes in this region using multi-year inventories based on Landsat images from 1981-2013. Results show that the total area of 141 glaciers in the region decreased by 30.44 +…	climate change; glacier calving; glacier fluctuations; jokulhlaups (GLOFs); remote sensing	-		1
Recent glacier retreat and climate trends in Cordillera Huaytapallana, Peru		We analyzed 19 annual Landsat Thematic Mapper images from 1984 to 2011 to determine changes of the glaciated surface and snow line elevation in six mountain areas of the Cordillera Huaytapallana range in Peru. In contrast to other Peruvian mountains, glacier retreat in these mountains has been poorly documented, even though this is a heavily glaciated area. These glaciers are the main source of w…	glacier retreat; snow line; climate change; lake formation; Cordillera Huaytapallana; Peru	-										1
Recent change and prediction of glacier-dammed lake outburst floods from Kunmalik River in southern Tien Shan, China		Glacier Lake Outburst Flood (GLOF) from a glacier-dammed lake in the Central Tien Shan has occurred during almost 100 years. Recent records of the GLOF events in the 1990s has indicated that the lake volume and peak discharge are becoming larger and larger corresponding to a warming and wetting of the inner Asian continent. Two extraordinary events of GLOF in summer 1994 and winter 1996 are inves…		-	1
Recent occurrence of large jokulhlaups at Lake Tuborg, Ellesmere Island, Nunavut		The varved sediment record from glacially-fed Lake Tuborg, Ellesmere Island, Nunavut, shows that only three large jokulhlaups have occurred there in the last millennium: 2003, 1993, and 1960. Detailed analyses of sediment microstructure and particle size, combined with in-situ hydrometeorological and limnological process studies, allowed jokulhlaup facies identification and discrimination from de…	Jokulhlaup; Varve; Ice-dammed lake; Canadian High Arctic; Lake processes	-									1
RECOGNITION OF DRAINAGE TUNNELS DURING GLACIER LAKE OUTBURST EVENTS FROM TERRESTRIAL IMAGE SEQUENCES		In recent years, many glaciers all over the world have been distinctly retreating and thinning. One of the consequences of this is the increase of so called glacier lake outburst flood events (GLOFs). The mechanisms ruling such GLOF events are still not yet fully understood by glaciologists. Thus, there is a demand for data and measurements that can help to understand and model the phenomena. The…	Time-lapse; image sequences; glacier lake outburst floods; feature tracking; glacier movement	-											1
Reconciling channel formation processes with the nature of elevated outflow systems at Ophir and Aurorae Plana, mars		Many Hesperian outflow channels head at elevations compatible with aquifer recharge beneath the martian south polar cap, and such channels are widely interpreted as the products of this recharge. Some outflow channels head at greater elevations that are inconsistent with southern recharge, including three systems located in Aurorae Planum and eastern Ophir Planum. These three systems have previou…		-
Reconstructing historic Glacial Lake Outburst Floods through numerical modelling and geomorphological assessment: Extreme events in the Himalaya		Recession of high-mountain glaciers in response to climatic change frequently results in the development of moraine-dammed glacial lakes. Moraine dam failure is often accompanied by the release of large volumes of water and sediment, termed a Glacial Lake Outburst Flood (GLOF). Chukhung Glacier is a small (similar to 3km(2)) receding valley glacier in Mt. Everest (Sagarmatha) National Park, Nepal…	Moraine-dam; Glacial Lake Outburst Flood (GLOF); Structure-from-Motion; dam-breach modelling; hydrodynamic modelling	-		1
Reconstructing streamflow variation of the Baker River from tree-rings in Northern Patagonia since 1765		The understanding of the long-term variation of large rivers streamflow with a high economic and social relevance is necessary in order to improve the planning and management of water resources in different regions of the world. The Baker River has the highest mean discharge of those draining both slopes of the Andes South of 20 degrees S and it is among the six rivers with the highest mean strea…	Water resources; Climate variability; Southern Annular Mode; Nothofagus pumilio; Chile; Argentina	-											1
Reconstructing the timescale of a catastrophic fan-forming event on Earth using a mars model		The calculation of formation timescales of alluvial fans and deltas on mars is important as it has direct implications for understanding the planet's hydrologic history. The robustness of sediment transport models is not in doubt but validation of the broad approach using a terrestrial example of similar scale and likely origin, where hydraulic parameters and timescales are known, is useful. Usin…		-
Reconstructing the timing of flash floods using Be-10 surface exposure dating at Leidy Creek alluvial fan and valley, White Mountains, California-Nevada, USA		Large alluvial fans characterize the piedmonts of the White Mountains, California-Nevada, USA, with large boulders strewn across their surfaces. The boulders are interpreted as flash floods deposits with an unclear trigger for the transport process. Several triggers are possible, including glacial lake outburst floods (GLOFs), thunderstorms or rainfall on snow cover. From a paleoenvironmental per…	Alluvial fans; Be-10 cosmogenic nuclides; OSL dating; Flash floods; Glaciation; Quaternary; Holocene; White Mountains; Fish Lake Valley	-									1
Reconstruction of a glacial lake outburst flood (GLOF) in the Engano Valley, Chilean Patagonia: Lessons for GLOF risk management		Floods from moraine-dammed lake failures can have long standing effects not only on riverine landscapes but also on mountain communities due to the high intensity (i.e. great depth and high velocities) and damaging capacity of glacial lake outburst floods (GLOFs). GLOFs may increase in frequency as glaciers retreat and new lakes develop and there is an urgent need to better understand GLOF dynami…	GLOF; HEC-RAS modelling; Patagonia; Bahia Murta; Migration	-											1
Reconstruction of glacial lake outburst floods in northern Tien Shan: Implications for hazard assessment		Glacier lake outburst floods (GLOFs) and related debris flows are among the most significant natural threats in the Tien Shan Mountains of kyrgyzstan and have even caused the loss of life and damage to infrastructure in its capital Bishkek. An improved understanding of the occurrence of this process is essential so as to be able to design reliable disaster risk reduction strategies, even more so …	Debris flow; GLOF; Tree rings; Dendrogeomorphology; Glacier; Aksay; kyrgyz range; kyrgyzstan	-	1
Reconstruction of the largest Holocene jokulhlaup within Jokulsa a Fjollum, NE iceland		Glacial outburst floods (jokulhlaups) have a significant role for landscape evolution in NE iceland. A number of jokulhlaups have routed from the northern margin of Vatnajokull during the Holocene. In this study, reconstruction of the largest Holocene jokulhlaup along Jokulsa Fjollum, NE iceland was undertaken using the HEC-RAS hydraulic modelling and HEC-GeoRAS flood mapping techniques with a Di…		-					1
Reconstruction of the Late-glacial and Holocene history of Lake Oron (Eastern Siberia, Russia) based on high-resolution reflection seismic data		High-resolution seismic data have been used to study the sedimentary infill of Lake Oron. We have tested the idea that glacial Lake Vitim could be formed when glaciers descending from the Kodar Mountains blocked the Vitim River at Lake Oron. The five seismic facies types (shallow, pelagic, mudslide and turbidite, rock-sandslide, and alluvial or glacial fan facies) and five seismic units were iden…	High-resolution seismic data; Lake Oron; Glacier-dammed lake; LGM; East Siberia	-
Record of glacial Lake Missoula floods in glacial Lake Columbia, Washington		During the last glaciation (marine oxygen isotope stage 2), outburst floods from glacial Lake Missoula deposited diagnostic sediments within glacial Lake Columbia. Two dominant outburst flood lithofacies are present within glacial Lake Columbia deposits: a flood expansion bar facies and a finer-grained hyperpycnite facies. We conclude that the flood sediments have a glacial Lake Missoula source b…	Glacial Lake Missoula; Glacial Lake Columbia; Outburst floods; Stratigraphy; Sedimentology	-									1
Record of large, Late Pleistocene outburst floods preserved in Saanich Inlet sediments, Vancouver Island, Canada		Two anomalous, gray, silty clay beds are present in ODP cores collected from Saanich Inlet, Vancouver Island, British Columbia, Canada. The beds, which date to about 10,500 C-14 yr BP (11,000 calendar years BP), contain Tertiary pollen derived from sedimentary rocks found only in the Fraser Lowland, on the mainland of British Columbia and Washington just east of the Strait of Georgia. Abundant il…		-									1
Recurring Jokulhlaups in Salka, northern sweden		An ice-dammed lake at the margin of the glacier Salkaglaciaren, in the Kebnekaise Mountains in northern sweden, drained suddenly in July 2003 producing a flood with a measured peak discharge of 9.5 +/- 0.25 m(3)s(-1). The total lake volume of 4,55 x 10(5) m(3) drained within two days. The hydrograph of this event is characteristic of a jokulhlaup controlled by a single basal ice tunnel that enlar…	outburst flood; jokulhlaup; glacier; ice-damned lake; peak-discharge; hydrograph; polythermal glacier; northern sweden	-						1
Recurring middle Pleistocene outburst floods in east-central alaska		Recurring glacial outburst floods from the Yukon-Tanana Upland are inferred from sediments exposed along the Yukon River near the mouth of Charley River in east-central alaska. Deposits range from imbricate gravel and granules indicating flow locally extending up the Yukon valley, to more distal sediments consisting of at least 10 couplets of planar sands, granules, and climbing ripples with up-v…	glacial chronology; tephra; early-middle Pleistocene; Yukon River; outburst floods	-							1		1
Reduced glacier sliding caused by persistent drainage from a subglacial lake		We present velocity observations of a glacier outlet in Vatnajokull, iceland, deduced from interferometric SAR (InSAR) data obtained during the ERS1/2 tAndem mission in 1995-2000. More than a 50% decrease in glacier velocity was observed subsequent to a large jokulhlaup from the subglacial lake Grimsvotn in 1996. The glacier had not reached its former flow rate in 2000. The jokulhlaup damaged the…		-					1
Refining the pattern and style of Cordilleran Ice Sheet retreat: palaeogeography, evolution and implications of lateglacial ice-dammed lake systems on the southern Fraser Plateau, British Columbia, Canada		Decay of the last Cordilleran Ice Sheet (CIS) near its geographical centre has been conceptualized as being dominated by passive downwasting (stagnation), in part because of the lack of large recessional moraines. Yet, multiple lines of evidence, including reconstructions of glacio-isostatic rebound from palaeoglacial lake shoreline deformation suggest a sloping ice surface and a more systematic …		-								1	1
Regional drainage of meltwater beneath a Hesperian-aged south circumpolar ice sheet on mars		Five sinuous valleys that begin near the margins of the Hesperian-aged Dorsa Argentea Formation (DAF) are examined using mars Global Surveyor mars Orbiter Laser Altimeter data. These valleys are carved into the surrounding Noachian cratered terrain and extend away from the DAF for lengths up to 1600 km before terminating in the Argyre basin 1-3 km below their starting elevations. The association …	Dorsa Argentea Formation; mars; meltwater	-
Regional reconstruction of subglacial hydrology and glaciodynamic behaviour along the southern margin of the Cordilleran Ice Sheet in British Columbia, Canada and northern Washington State, USA		Subglacial landsystems in and around Okanagan Valley, British Columbia, Canada are investigated in order to evaluate landscape development, subglacial hydrology and Cordilleran Ice Sheet dynamics along its southern margin. Major landscape elements include drumlin swarms and tunnel valleys. Drumlins are composed of bedrock, diamicton and glaciofluvial sediments; their form truncates the substrate.…		-									1
Regional unconformities and the sedimentary architecture of the Oak Ridges Moraine area, southern Ontario		Seismic stratigraphy, geometry, and sediment facies within the Oak Ridges Moraine (ORM) area of Ontario record major structural elements and surfaces of the Quaternary sedimentary sequence. The derived stratigraphic architecture can be used to identify the key elements of a regional erosional surface, represented by an unconformity in the subsurface, and associated overlying channel sediments. Th…		-									1
Regional-scale analysis of high-mountain multi-hazard and risk indicators in the Pamir (Tajikistan) with GRASS GIS		We present a model framework for the regional-scale analysis of high-mountain multi-hazard and -risk indicators, implemented with the open-source software package GRASS GIS. This framework is applied to a 98 300 km(2) study area centred in the Pamir (Tajikistan). It includes (i) rock slides, (ii) ice avalanches, (iii) periglacial debris flows and (iv) lake outburst floods. First, a hazard indicat…		-	1
Regional-scale analysis of lake outburst hazards in the southwestern Pamir, Tajikistan, based on remote sensing and GIS		This paper presents an analysis of the hazards emanating from the sudden drainage of alpine lakes in South-Western Tajik Pamir. In the last 40 yr, several new lakes have formed in the front of retreating glacier tongues, and existing lakes have grown. Other lakes are dammed by landslide deposits or older moraines. In 2002, sudden drainage of a glacial lake in the area triggered a catastrophic deb…		-	1
Regional-scale models of debris flows triggered by lake outbursts: the June 25, 2001 debris flow at Tasch (Switzerland) as a test study		A comparably small overflow of the moraine-dammed Lake Weingarten (Valais, Switzerland) on June 2001 triggered a debris flow which caused severe damage in the village of Tasch. The lake outburst was probably caused by a combination of blockage of the outflow by snow or ice blocks and piping processes including retrogressive erosion at the outer side of the moraine. The Tasch debris flow is used t…	glacial lake outburst; topography-based models; hydrological flow routing; single and multiple flow direction; GIS	-				1
Related magma-ice interactions: Possible origins of chasmata, chaos, and surface materials in Xanthe, Margaritifer, and Meridiani Terrae, mars		We examine here the close spatial and temporal associations among several unique features of Xanthe and Margaritifer Terrae, specifically the Valles Marineris troughs or chasmata and their interior deposits, chaotic terrain, the circum-Chryse outflow channels, and the subdued cratered material that covers Xanthe, Margaritifer, and Meridiani Terrae. Though previous hypotheses have attempted to exp…	mars; volcanism; chasmata; tuya; jokulhlaup	-
Relationship between morphology and glaciomarginal deposition in the foreland area of the Opava Mountains (S Poland)		The glaciomarginal zone in front of the Opava Mountains (Eastern Sudetes) shows complex relief. This relief resulted during the Pleistocene in glaciomarginal sedimentation that differed from sedimentation in lowlands. Sedimentological analysis was carried out on deposits of the Odranian Glaciation, when the scandinavian ice sheet reached its maximum extent in the Eastern Sudetes foreland. Three s…	Poland; Pleistocene; sedimentology; mountain foreland; glaciomarginal zone	-
Relationships between flow hydraulics, sediment supply, bedload transport and channel stability in the proglacial Virkisa River, iceland		We present data from a proglacial river in iceland that exhibits very different sedimentological characteristics when compared to its alpine counterparts. The braidplain is characterised by coarse outburst gravels that inhibit sediment transport and channel change. Bedload transport is restricted to the movement of fine-grained gravels that pass through the channel system without promoting signif…		-					1
Relative sea-level data from southwest Scotland constrain meltwater driven sea-level jumps prior to the 8.2 kyr BP event		The most significant climate cooling of the Holocene is centred on 8.2 kyr BP (the '8.2 event'). Its cause is widely attributed to an abrupt slowdown of the Atlantic Meridional Overturning Circulation (AMOC) associated with the sudden drainage of Laurentide proglacial Lakes Agassiz and Ojibway, but model simulations have difficulty reproducing the event with a single-pulse scenario of freshwater …	Sea level; 8.2 ka event; Early Holocene; Ice-sheet; Lake drainage; Scotland	-									1
Remote sensing based assessment of hazards from glacier lake outbursts: a case study in the Swiss Alps		Glacier lakes are a common phenomenon in high mountain areas. Outbursts from glacier lakes have repeatedly caused the loss of human lives as well as severe damage to local infrastructure. In several high mountain ranges around the world, a grave uncertainty about the hazard potential of glacier lakes still exists, especially with respect to the effects of accelerating rates of glacier retreat as …	glacier lake outburst; hazard potential; remote sensing; empirical parameters	-				1
Remote sensing based hazard assessment of glacial lakes: a case study in Zanskar basin, Jammu and Kashmir, India		The climate change of the 20th century has had a pronounced effect on glacier environments of the Himalayas. The formation of moraine dammed glacial lakes and outburst floods from such lakes are a major concern in countries such as Bhutan, Tibet (China), India, Nepal and Pakistan. The hazardous lakes, however, are situated in remote areas and are very difficult to monitor through ground surveys d…		-		1
Remote sensing of alpine lake water environment changes on the Tibetan Plateau and surroundings: A review		Alpine lakes on the Tibetan Plateau (TP) are key indicators of climate change and climate variability. The increasing availability of remote sensing techniques with appropriate spatiotemporal resolutions, broad coverage and low costs allows for effective monitoring lake changes on the TP and surroundings and understanding climate change impacts, particularly in remote and inaccessible areas where…	Tibetan Plateau; Lake; Remote sensing; Glacial lake; Climate change	-
Remote Sensing of Suspended Particulate Matter in Himalayan Lakes A Case Study of Alpine Lakes in the Mount Everest Region		This study presents satellite data and in situ measurements to estimate the concentration of suspended solids in high-altitude and remote lakes of the Himalayas. Suspended particulate matter (SPM) concentrations measured in 13 lakes to the south of Mount Everest (Nepal) in October 2008 and reflectance values of the Advanced Visible and Near Infrared Radiometer type 2 (AVNIR-2) onboard ALOS, acqui…	Himalayan lakes; water color; suspended solids; glacier-lake interactions; remote sensing; ALOS AVNIR-2; Nepal	-		1
Remote sensing-based hazard assessment of glacial lakes in Sikkim Himalaya		Glacial lake is a water body formed in/under/besides and/or in front of a glacier due to glacial dynamics. Such high-altitude glacial lakes are hazardous to humanity and infrastructure as they can drain instantaneous and create devastating floods in the downstream. The formation of moraine-dammed glacial lakes and glacial lake outburst flood (GLOF) is major concern in countries such as Bhutan, Ti…	Glacial lakes; hazard assessment; outburst floods; remote sensing	-		1
Remote sensing-based inventory of glacial lakes in Sikkim Himalaya: semi-automated approach using satellite data		The climate change of the twentieth century had a pronounced effect on glacier environments of the Himalaya. The formation of supraglacial lakes and moraine dammed glacial lakes and glacial lake outburst flood is a major concern in countries such as Bhutan, China (Tibet), India, Nepal and Pakistan. This article depicts a semi-automated identification of glacial lakes in the Sikkim Himalaya, from …		-		1
Remote sounding of Greenland supraglacial melt lakes: implications for subglacial hydraulics		A supraglacial lake-depth retrieval function is developed, based on the correspondence between moderate-resolution imaging spectroradiometer (MODIS) reflectance and water depth measured during raft surveys. Individual lake depth, area and volume statistics, including short-term temporal changes for Greenland's southwestern ablation region, were compiled for 2000-05. The maximum area of an individ…		-								1
Remote-sensing-based analysis of the 1996 surge of Northern Inylchek Glacier, central Tien Shan, kyrgyzstan		The evolution of Northern Inylchek Glacier and its proglacial lake - Upper Lake Merzbacher - during its 1996 surge and the surrounding decades is analyzed with remote sensing imagery. Overall retreat of the glacier from 1943 to 1996 enlarged the lake to 4 km long and approximate to 100 m deep. The surge in 1996 initiated between 12 September and 7 October and advanced the glacier by 3.7 km to ove…	Glacier surge; remote sensing; Lower Lake Merzbacher; Upper Lake Merzbacher; bathymetry; glacier lake outburst flood	-	1
Repeated glacial lake outburst flood threatening the oldest Buddhist monastery in north-western Nepal		Since 2004, Halji village, home of the oldest Buddhist Monastery in north-western Nepal, has suffered from recurrent glacial lake outburst floods (GLOFs). A sudden englacial drainage of a supraglacial lake, located at a distance of 6.5 km from the village, was identified as the source of the flood. The topography of the lake basin was mapped by combining differential Global Positioning System (DG…		-		1
Repeated glacial-lake outburst floods in Patagonia: an increasing hazard?		Five similar glacial-lake outburst floods (GLOFs) occurred in April, October, December 2008, March and September 2009 in the Northern Patagonia Icefield. On each occasion, Cachet 2 Lake, dammed by the Colonia Glacier, released circa 200-million m(3) water into the Colonia River. Refilling has occurred rapidly, such that further outbreak floods can be expected. Pipeflow calculations of the subglac…	Jokulhlaup; Outburst flood; Patagonia; Glacial-lake; Climate change	-											1
Repetition of debris flows on sunny days at a torrent in Karakorum		Debris flows attacked KAnde, a small village on the fan of Aa River, in Karakorum, Pakistan in late July 1997 creating a significant disaster. The author visited KAnde to investigate the hazard in late July 2000, and unexpectedly encountered another debris flow in Aa River. The conditions of debris-flow occurrences were unique. Both debris flows occurred on clear days without any rainfall. Debris…	debris flow; pulsation; glacial-outburst flood; Karakorum	-			1
Resident oral histories: A tool for the study of recent environmental change on the Stikine Plateau of northwestern British Columbia		Resident oral histories are potentially powerful tools for both the spatial and temporal resolution of past changes in the physical environment, particularly in remote, isolated areas. Although subsequent physical verification is desirable, oral histories may provide the initial evidence of past events. This methodology is most likely to be effective when researchers have some knowledge of the so…		-									1
Resident perception of volcanic hazards and evacuation procedures		Katla volcano, located beneath the Myrdalsjokull ice cap in southern iceland, is capable of producing catastrophic jokulhlaup. The icelandic Civil Protection (ICP), in conjunction with scientists, local police and emergency managers, developed mitigation strategies for possible jokulhlaup produced during future Katla eruptions. These strategies were tested during a full-scale evacuation exercise …		-					1
Residents' attitudes and behaviour before and after the 2010 Eyjafjallajokull eruptions-a case study from southern iceland		While the disruption to international air travel caused by the eruption of iceland's Eyjafjallajokull volcano in 2010 has been well documented, the significant social impacts on local residents from ash fall to the south and east of the crater are less well-known. These impacts and attitudes of impacted residents and emergency managers are the foci of our present study. Prior to and during the er…	Risk perception; Volcanic ash; Emergency response; Mixed methods; Katla	-					1
Response of debris-covered glaciers in the Mount Everest region to recent warming, and implications for outburst flood hazards		In areas of high relief, many glaciers have extensive covers of supraglacial debris in their ablation zones, which alters both rates and spatial patterns of melting, with important consequences for glacier response to climate change. Wastage of debris-covered glaciers can be associated with the formation of large moraine-dammed lakes, posing risk of glacier lake outburst floods (GLOFs). In this p…	Glaciers; Debris-covered glaciers; Himalaya; Glacier lake outburst floods	-		1
Response of glacial-lake outburst floods to climate change in the Yarkant River basin on northern slope of Karakoram Mountains, China		Based on the glacial flood events and climate change in the Yarkant River basin during the past 50 years, the study investigated the long-term change of temperature and precipitation, the characteristics of glacial floods, the origin of sudden flood release, the suggested flood mechanism of glacial lakes and the relationship between glacial floods and climate change. Results showed that there was…		-			1
Response of glacier basal motion to transient water storage		Basal motion of glaciers is responsible for short-term variations in glacier velocity(1-6). At the calving fronts of marine-terminating outlet glaciers, accelerated basal motion has led to increased ice discharge and thus is tightly connected to sea level rise(1,7). Subglacial water passes through dynamic conduits that are fed by distributed linked cavities at the bed, and plays a critical role i…		-							1	1
RESULTS FROM THE 2009 GEOSCIENTIFIC EXPEDITION TO THE INYLCHEK GLACIER, CENTRAL Tien SHAN (kyrgyzSTAN)		The 2009 expedition led to the Inylchek Glacier in eastern kyrgyzstan, the largest glacier of the Tien Shan with a length of 60,5 kilometers. In this paper we present the results of our investigations in the surroundings of the Northern Inylchek Glacier, namely in the Peremitschka, the seasonally flooded plain situated between the Southern Inylchek Glacier and Upper Lake Merzbacher. During the su…	Frequency domain electromagnetics; Electric resistivity tomography; Glacier lake outburst flood; Remote sensing; Glacier karst	-	1
Reversal of ice motion during the outburst of a glacier-dammed lake on Gornergletscher, Switzerland		During the outburst flood of a glacier-dammed lake on Gornergletscher, Switzerland, in July 2004, the drained lake water triggered anomalous glacier motion. At the onset of the outburst, the ice-flow direction in the vicinity of the lake became closer to the central flowline. When the lake discharge magnitude decreased, the flow direction altered such that the ice moved back to the azimuth of the…		-				1
Review Article: Lake and breach hazard assessment for moraine-dammed lakes: an example from the Cordillrea Blanca (Peru)		Glacial lake outburst floods (GLOFs) and related debris flows represent a significant threat in high mountainous areas across the globe. It is necessary to quantify this threat so as to mitigate their catastrophic effects. Complete GLOF hazard assessment incorporates two phases: the probability of water release from a given glacial lake is estimated through lake and breach hazard assessment while…		-										1
Risk estimation for future glacier lake outburst floods based on local land-use changes		Effects of climate change are particularly strong in high-mountain regions. Most visibly, glaciers are shrinking at a rapid pace, and as a consequence, glacier lakes are forming or growing. At the same time the stability of mountain slopes is reduced by glacier retreat, permafrost thaw and other factors, resulting in an increasing landslide hazard which can potentially impact lakes and therewith …		-				1
Rock avalanches that travel onto glaciers and related developments, Karakoram Himalaya, Inner Asia		Catastrophic rock slope failures in rugged terrain commonly generate rock avalanches. When these occur in glacier basins the extent of landslide run out and its emplacement geometry are affected by movement over ice. Substantial modifications of glacier activity and sedimentation can follow. Ice activity leads to rapid modification, transport and dispersal of landslide debris. The nature of these…	Rock avalanches; Glacier surges; Disturbance regime; Upper Indus	-		1	1
ROCK-TYPE CONTROLS ON DOWNSTREAM CHANGES IN CLAST PARAMETERS IN SANDUR SYSTEMS IN SOUTHEAST iceland		The role of rock type in controlling downstream variation in clast parameters in non-jokulhlaup-affected, Oraefi sandar in iceland was evaluated. Clast changes in the Svinafellsa are simple, but the effects of tributary sources complicate the clast parameter-distance relationships in the Morsardalur-Kjos system. The behavior of individual rock types must be studied to understand the changes. Both…		-					1
Rothlisberger channel theory: its origins and consequences		The theory of channelized water flow through glaciers, most commonly associated with the names of Hans Rothlisberger and Ron Shreve and their 1972 papers in the Journal of Glaciology, was developed at a time when interest in glacier bed processes was expanding, and the possible relationship between glacier sliding and water at the bed was becoming of keen interest. The R-channel theory provided f…		-
Rothlisberger channels with finite ice depth and open channel flow		The theoretical basis of subglacial channel dynamics can be traced back to the work of Rothlisberger (1972) and Nye (1953). Rothlisberger (1972) considered the channels' behaviour to be governed by a mix between water friction melting back the channel walls and the viscous closure of the surrounding ice; Nye (1953) derived a viscous closure rate for the ice. While their modelling is evidently wel…	fluvial transport	-
Satellite remote sensing procedures for glacial terrain analyses and hazard assessment in the Aoraki Mount Cook region, New Zealand		Hazards originating within glacial environments have received limited attention in New Zealand. In view of rapidly changing environmental conditions and the need for ongoing monitoring, overseas studies have recognised the importance of remote sensing procedures to support related hazard investigations. The initial goal for regional hazard studies is the identification of potential source areas o…	glacial hazard; glacial change; remote sensing; terrain analyses; ASTER; New Zealand	-
Scientific research for landslide risk analysis and international education for mitigation and preparedness		Scientific activities of the World Centre of Excellence on Landslide Disaster Reduction at Charles University in Prague (2011-2014) combine field research using several techniques, capacity building, and international collaboration. Through our landslide research in Peru, Ethiopia, and at several localities inside the Czech Republic, we consider the landslide phenomena as being a part of the phys…	Slope movements; Natural hazards; Capacity building; High mountain areas	-
Seasonal variation in the chemistry of glacial-fed rivers in iceland		Ten icelandic rivers have been monitored at 11 sites throughout one year to obtain baseline values for the design of warning systems based on chemical changes preceding subglacial volcanic eruptions. Seasonal changes characteristic of each river have been identified as well as alarm values for chosen parameters. Six pilot systems based on the measurement of conductivity have been put into operati…	seasonal variation; glacial rivers; monitoring; volcanic; geothermal; jokulhlaup; subglacial eruption; conductivity; mercury; hydrogen sulphide	-					1
Seasonal waves on glaciers		Seasonal waves accompanying annual changes in the sliding velocity of ice travel down glacier at speeds much faster than the ice itself. A simple explanation for these waves in terms of the passage of a pressure wave through the subglacial drainage system is given. Drainage by both distributed and localized systems is explored, with the sliding velocity governed by a dependence on the effective p…	subglacial hydrology; glacier sliding; glacier dynamics; seasonal drainage evolution	-
Seasonal-scale abrasion and quarrying patterns from a two-dimensional ice-flow model coupled to distributed and channelized subglacial drainage		Field data and numerical modeling show that glaciations have the potential either to enhance relief or to dampen topography. We aim to model the effect of the subglacial hydraulic system on spatiotemporal patterns of glacial erosion by abrasion and quarrying on time scales commensurate with drainage system fluctuations (e.g., seasonal to annual). We use a numerical model that incorporates a dual-…	Glacial erosion; Subgjacial hydrology; Abrasion; Quarrying; Ice-flow modeling; Sliding law	-
Sediment monitoring of glacial rivers in iceland: new data on bed load transport		Sediment monitoring of glacial rivers in iceland has been carried out at the Hydrological Service of the National Energy Authority during the past five decades. This paper describes the expansion of the monitoring in recent years, with special emphasis on recent bed load sampling. As an example, the results from an extensive sediment sampling project in the harnessed glacial river Thjorsa, south …	bed load transport; glacial rivers; iceland; jokulhlaup; suspended sediment load	-					1
Sediment rock magnetic properties indicate outburst events for Gega dammed lake at the Tsangpo Gorge in the Tibetan Plateau		A large ice-dammed lake exists at the entrance of Tsangpo gorge in the Tibetan Plateau. Many megafloods occured down the Tasangpo gorge during the last glaciation. The lacustrine sediments are important for understanding these periodic outburst floods. Through detailed rock magnetic studies of 39 lacustrine samples, we found the low frequency magnetic susceptibility (chi(If)) is high in fine sand…	Paleo-dammed lake; Rock magnetism; Tsangpo gorge; Outburst floods	-
Sediment transport rates of major floods in glacial and non-glacial rivers in norway in the present and future climate		This paper considers possible sediment transport impacts in both glacial and non-glacial rivers in norway from climate scenarios predicted by the RegClim (2005) project. The significance of high magnitude, low-frequency events as sediment transport agents is discussed on the basis of sediment transport measurements during major floods in various types of rivers. It was found that suspended sedime…	climate change; erosion; major floods; sediment transport	-						1
Sedimentary and stratigraphic evidence for subglacial flooding, south-central Michigan, USA		The glacial landscape in south-central Michigan is a dissected surface with streamlined, residual, and upland blocks surrounded by lowland valleys dominated by outwash. The upland surface has ridges, hills, and hummocks composed of boulder gravel, which are transitional to drumlins in a down-ice direction, and is dissected by tunnel channels with eskers within them. Sedimentary descriptions from …		-									1
Sedimentary and structural evolution of a relict subglacial to subaerial drainage system and its hydrogeological implications: an example from Anglesey, north Wales, UK		Subglacial drainage systems exert a major control on basal-sliding rates and glacier dynamics. However, comparatively few studies have examined the sedimentary record of subglacial drainage. This is due to the paucity of modern analogues, the limited recognition and preservation of upper flow regime deposits within the geological record, and the difficulty of distinguishing subglacial meltwater d…	Subglacial drainage; Upper plane bed; Helicoidal flow; Sinusoidal bedding; Hydrofracturing; Groundwater	-
Sedimentary architecture of large-scale, jokulhlaup-generated, ice-block obstacle marks: Examples from Skeidararsandur, SE iceland		During glacial outburst floods (jokulhlaups) large ice-blocks are often released from the glacier margin. Ice-blocks ground at points of flow deceleration, generating distinctive patterns of scour and deposition scaled to the obstacle size. The large-scale ice-block obstacle marks produced within the proglacial zone are diagnostic of jokulhlaups. We use ground-penetrating radar (CPR) to investiga…	Outburst flood; Jokulhlaup; Ice-block; Obstacle mark; Ground-penetrating radar	-					1
SEDIMENTARY EFFECTS OF CATACLYSMIC LATE PLEISTOCENE GLACIAL OUTBURST FLOODING, ALTAY MOUNTAINS, Siberia		Pleistocene glacial outburst floods were released from ice-dammed lakes of the Altay Mountains, south-central Siberia. The Kuray-Chuja lake system yielded peak floods in excess of 1 X 10(6) m3 s-1 and as great as 18 x 10(6) m3 s-1. The phenomenally high bed shear stresses and stream powers generated in these flows produced a main-channel, coarse-grained facies of coarse gravel in (1) foreset-bedd…		-
Sedimentary evidence for the formation mechanism of the Armoy moraine and Late Devensian glacial events in the north of Ireland		The internal sedimentology of the Annoy moraine, which marks a late Devensian (Weichselian) incursion of Scottish ice into the north of Ireland, is described from a temporary exposure near Annoy village. The exposure (up to 30 m long, 10 m high) comprises folded gravel beds, massive clay grading up to pebbly diamicton, massive gravel, overfolded and deformed sand, and a gravel and massive diamict…	Irish ice; Scottish ice; surging; glaciolacustrine; British ice sheet; Killard Point Stadial; late Devensian	-
Sedimentary imprints of former ice-sheet margins: Insights from an end-Ordovician archive (SW Libya)		From the Proterozoic to the Quaternary, the evolution of the Earth was characterised by recurrent periods of glaciation. However, the margins of many ancient ice-sheets are poorly defined on palaeogeographic reconstructions. The extent and outlines of ancient ice sheets can be better understood through careful documentation of sediments deposited at the ice-sheet margin. An outstanding example is…	Murzuq Basin; HirnanTian glaciation; Ice front; Tunnel valleys; Glaciotectonic; Supercritical flows	-
Sedimentary record of glacial Lake Mackenzie, Northwest Territories, Canada: Implications for Arctic freshwater forcing		The global oceanographic impact of large volumes of freshwater entering the Arctic Ocean from North america during Laurentide Ice Sheet deglaciation is the subject of much discussion. The model of lateglacial runoff-forced changes in ocean thermohaline circulation (THC) is constrained in part due to a lack of detailed study of the relevant terrestrial glacial sedimentary and geomorphic record. Th…	Glacial Lake Mackenzie; Northwest Territories; Freshwater runoff; Arctic Ocean	-									1
Sedimentary successions in ice-marginal fans of the Late Saalian glaciation, southwestern Poland		The Late Saalian end moraines of southwestern Poland contain several features that may be attributed to the formation that is predominantly controlled by the deposition of soiled (waterlaid) sediments. These hills are essentially small alluvial fans with ice-contact facies, They have a semi-conical form, plano-convex geometry, their distal slopes are up to 5degrees, and proximal slopes are betwee…	fan-type end moraines; ice-marginal sedimentation; SW Poland	-
SEDIMENTATION IN ICE-DAMMED GLACIAL LAKE ASSINIBOINE, SASKATCHEWAN, AND CATASTROPHIC DRAINAGE DOWN THE ASSINIBOINE VALLEY		Ice-dammed glacial Lake Assiniboine covered approximately 1500 km(2) in eastern Saskatchewan at about 11,000 BP. Lithofacies in two cores from the lake basin were identified, correlated, and linked to paleolake strandlines and inflow and outflow channels discerned from aerial photos and surface mapping. Deeper lake stages are reflected by silt and clay varve deposition in the deepest part of the …		-
Sedimentologic evidence for outburst floods from the Laurentide Ice Sheet margin in Wisconsin, USA: implications for tunnel-channel formation		Clast-supported boulder gravel in outwash-fans along the glacial-maximum margin of the Laurentide Ice Sheet in Wisconsin indicates the occurrence of outburst floods. These sediments, with clast intermediate axes of up to 2 m, are located downstream of tunnel channels and were deposited shortly before cessation of glaciofluvial activity on each fan. Since tunnel channels with fans are widespread a…		-									1
[truncated: 159 more rows]

## Sheet: COOPERATION
	USA	UK	CANADA	ICELAND	GERMANY	CHINA	SWITZERLAND	JAPAN	FRANCE	NORWAY	INDIA	SWEDEN	NEPAL	RUSSIA	ITALY	DENMARK	AUSTRIA	CZECH REPUBLIC	NEW ZEALAND	POLAND	SPAIN	PERU	AUSTRALIA	CHILE	FINLAND	NETHERLANDS	ARGENTINA	BELGIUM	KYRGYZSTAN	SOUTH AFRICA	PAKISTAN	IRELAND	BHUTAN	TAIWAN	KAZAKHSTAN	SINGAPORE	BOLIVIA	COLOMBIA	IRAN	LEBANON	MALAYSIA	MEXICO	PORTUGAL	SAUDI ARABIA	UZBEKISTAN		TOTAL ITEMS (CO)AUTHORED	INTERNATIONAL ITEMS (CO)AUTHORED	MONONATIONAL ITEMS
[truncated: 45 more rows]
