# Supplementary material for: GLOFs in the WOS: bibliometrics, geographies and global trends of research on glacial lake outburst floods (Web of Science, 1979–2016)
Source: Copernicus journal article supplement (doi:10.5194/nhess-18-813-2018), 2018-03-14
Supplement: Supplementary file [file nhess-18-813-2018-supplement-title-page.pdf › nhess-18-813-2018-supplement-title-page.pdf]

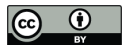

## *Supplement of*

# **GLOFs in the WOS: bibliometrics, geographies and global trends of research on glacial lake outburst floods (Web of Science, 1979–2016)**

**Adam Emmer**

*Correspondence to:* Adam Emmer (aemmer@seznam.cz)

- nhess-18-813-2018-supplement-title-page.pdf
- SUPPLEMENT.xlsx

The copyright of individual parts of the supplement might differ from the CC BY 4.0 License.
